# Supplementary material
Source: publisher site journal article supplement (https://www.spandidos-publications.com/2992/downloadSupplementary)
Supplement: Supplementary file 1 [file downloadSupplementary]

## Sheet: Table_S2_complete_data
Table SII. Proteins identified in 30 samples (complete data; LFQ intensity, MS count and intensity; CIS versus CISMET).
Ratio H/L normalized CIS_CISMET_1	Ratio H/L normalized CIS_CISMET_2	Ratio H/L normalized CIS_CISMET_3	Only identified by site	Reverse	Contaminant	Unique peptides	Sequence coverage [%]	Mol. weight [kDa]	Intensity CIS_CISMET_1	Intensity L CIS_CISMET_1	Intensity H CIS_CISMET_1	Intensity CIS_CISMET_2	Intensity L CIS_CISMET_2	Intensity H CIS_CISMET_2	Intensity CIS_CISMET_3	Intensity L CIS_CISMET_3	Intensity H CIS_CISMET_3	Protein IDs	Majority protein IDs	Protein names	Gene names	Proteins
NaN	NaN	NaN	Intensity H CIS_CISMET_3	Only identified by site	Reverse	NaN	NaN	NaN	NaN	NaN	NaN	NaN	NaN	NaN	NaN	NaN	NaN	P02511;E9PR44;E9PRA8;E9PJL7;A0A024R3B9;E9PNH7	P02511;E9PR44;E9PRA8;E9PJL7;A0Protein IDs	Peptide counts (unique)	Protein names	Fasta headers
NaN	NaN	0.96392				1	3.8	44.822	0	0	0	0	0	0	2930900	1406200	1524700	A0A087X1N8;A0A024QZX5;P35237	A0A087X1N8;A0A024QZX5;P35237	Serpin B6	SERPINB6	3
NaN	NaN	NaN				1	13.5	20.049	0	0	0	0	0	0	0	0	0	K7ER74;A0A024R0T9;P02655;V9GYJ8	K7ER74;A0A024R0T9;P02655;V9GYJ8	Apolipoprotein C-II	APOC2	4
1.3785	1.2826	NaN				2	10.9	20.159	36808000	13023000	23785000	9925700	3162900	6762800	0	0	0	P02511;E9PR44;E9PRA8;E9PJL7;A0A024R3B9;E9PNH7	P02511;E9PR44;E9PRA8;E9PJL7;A0A024R3B9;E9PNH7	Alpha-crystallin B chain	CRYAB	6
NaN	NaN	NaN				1	1.6	104.86	0	0	0	0	0	0	0	0	0	O60462;X5D2Q8;O60462-3;Q7LBX6;A0A024R3W6;O60462-2;O60462-5;A0A024R412;O60462-4;O60462-6	O60462;X5D2Q8;O60462-3;Q7LBX6;A0A024R3W6;O60462-2;O60462-5;A0A024R412;O60462-4;O60462-6	Neuropilin-2	NRP2	10
0.997	1.029	1.0057				5	5.4	141.44	14301000	6030600	8270500	15930000	6300000	9630100	32125000	14056000	18069000	A0A024R4E5;Q00341;Q00341-2;H0Y394;C9JIZ1;C9J5E5;C9JZI8;C9JES8;C9JHZ8;C9JHS7;H7C0A4;H7C2D1;H7BZC3;C9JK79;C9JT62;C9JHN6;C9JEJ8;C9JBS3;C9JQ82;C9JMQ6	A0A024R4E5;Q00341;Q00341-2;H0Y394;C9JIZ1;C9J5E5	Vigilin	HDLBP	20
NaN	NaN	NaN				1	7.7	22.591	0	0	0	0	0	0	58180	58180	0	A0A024R4M0;P46781	A0A024R4M0;P46781	40S ribosomal protein S9	RPS9	2
0.57483	NaN	NaN				1	2.2	61.927	2739800	1689900	1049900	0	0	0	0	0	0	A0A024R571;Q9H4M9;C9JC03;C9J2Z4	A0A024R571;Q9H4M9;C9JC03;C9J2Z4	EH domain-containing protein 1	EHD1	4
NaN	NaN	0.96902				1	4.7	25.898	0	0	0	0	0	0	4130700	1805200	2325500	A0A024RA52;P25787	A0A024RA52;P25787	Proteasome subunit alpha type-2	PSMA2	2
1.224	1.0975	0.98866				1	2.3	46.825	767090	260420	506670	1820800	798590	1022200	3567200	1823900	1743300	Q8TCT9-2;Q8TCT9-4;Q8TCT9;Q8TCT9-5;A0A075B6F6	Q8TCT9-2;Q8TCT9-4;Q8TCT9;Q8TCT9-5;A0A075B6F6	Minor histocompatibility antigen H13	HM13	5
NaN	NaN	NaN				1	1.4	154.18	0	0	0	0	0	0	0	0	0	P82279;F5H0L2;P82279-2;P82279-3;P82279-4;P82279-5;A0A075B6G4	P82279;F5H0L2;P82279-2;P82279-3;P82279-4;P82279-5;A0A075B6G4	Crumbs homolog 1	CRB1	7
0.91714	0.75581	NaN				1	6	20.825	8395300	4011800	4383500	6073700	2783900	3289800	0	0	0	P61224;P62834;F5H7Y6;P61224-3;E7ESV4;P61224-4;F5GX62;P61224-2;F5GYB5;A0A075B6Q0;F5H004;F5H6R7;F5H500;F5H0B7;F5H491;F5GWU8;F5H077;F5GYH7;F5H4H0;F8WBC0	P61224;P62834;F5H7Y6;P61224-3;E7ESV4;P61224-4;F5GX62;P61224-2;F5GYB5;A0A075B6Q0;F5H004;F5H6R7;F5H500;F5H0B7;F5H491;F5GWU8;F5H077;F5GYH7;F5H4H0;F8WBC0	Ras-related protein Rap-1b;Ras-related protein Rap-1A	RAP1B;RAP1A	20
NaN	NaN	NaN				1	38.1	2.1104	0	0	0	0	0	0	0	0	0	A0A075B6Z2	A0A075B6Z2			1
1.0846	1.052	1.0565				1	5.2	21.643	5388300	1793600	3594700	11578000	4730800	6846900	2244500	973210	1271200	A0A075B716;H0YN88;P08708	A0A075B716;H0YN88;P08708	40S ribosomal protein S17	RPS17L;RPS17	3
NaN	NaN	1.039				1	7.2	49.775	0	0	0	0	0	0	4238900	1649800	2589000	Q3ZCM7;Q5SQY0;A0A075B736	Q3ZCM7;Q5SQY0;A0A075B736	Tubulin beta-8 chain	TUBB8;RP11-631M21.2	3
NaN	NaN	NaN				1	7	33.172	0	0	0	0	0	0	0	0	0	Q9Y314;M0R3B2;A0A075B797	Q9Y314;M0R3B2;A0A075B797	Nitric oxide synthase-interacting protein	NOSIP	3
1.1749	0.99545	1.5889				2	3.9	61.829	8767900	3432100	5335800	10564000	3804500	6759700	13918000	6170700	7747700	Q92804;Q92804-2;H3BPE7;P35637;P35637-2;A0A075B7D9	Q92804;Q92804-2;H3BPE7;P35637;P35637-2;A0A075B7D9	TATA-binding protein-associated factor 2N;RNA-binding protein FUS	TAF15;FUS	6
0.92603	0.89838	0.94924				2	3.1	70.923	4913200	2188200	2725100	35270000	14671000	20598000	27669000	16319000	11350000	Q16881;A0A087WSY9;Q16881-6;Q16881-3;A0A182DWI3;Q16881-4;A0A087WSW9;Q16881-2;Q16881-5;F8W809;E9PIR7;Q16881-7;E2QRB9;E9PKD3;E9PIZ5;A0A0B4J225;E9PJU2;E9PKI4;E9PLT3;E9PQI3	Q16881;A0A087WSY9;Q16881-6;Q16881-3;A0A182DWI3;Q16881-4;A0A087WSW9;Q16881-2;Q16881-5;F8W809;E9PIR7;Q16881-7;E2QRB9;E9PKD3;E9PIZ5;A0A0B4J225;E9PJU2;E9PKI4;E9PLT3;E9PQI3	Thioredoxin reductase 1, cytoplasmic	TXNRD1	20
0.76883	0.61919	NaN				1	4.2	18.225	54848000	28674000	26174000	124480000	67315000	57169000	0	0	0	Q9NP73-2;A0A096LP10;A0A087WT15	Q9NP73-2;A0A096LP10;A0A087WT15			3
0.74647	1.2026	1.1036				1	3.2	45.745	1860900	695950	1165000	3083400	1123000	1960400	2524400	989450	1535000	O60884;A0A087WT48	O60884;A0A087WT48	DnaJ homolog subfamily A member 2	DNAJA2	2
NaN	NaN	NaN				2	100	2.489	0	0	0	0	0	0	0	0	0	A0A087WT72	A0A087WT72			1
NaN	NaN	NaN				1	1	146.56	0	0	0	0	0	0	0	0	0	A0A087WVC6;A0A087WTK0;Q12913;Q12913-2	A0A087WVC6;A0A087WTK0;Q12913;Q12913-2	Receptor-type tyrosine-protein phosphatase eta	PTPRJ	4
1.84	1.2078	0.76578				1	2.5	73.027	795200	247470	547740	5364700	1830100	3534700	6680200	3318400	3361900	A0A087WTP3;Q92945;M0R0C6;M0QYG1	A0A087WTP3;Q92945;M0R0C6;M0QYG1	Far upstream element-binding protein 2	KHSRP	4
0.98101	2.2385	2.118				1	3.8	70.67	34945000	10851000	24094000	23519000	4043100	19476000	57124000	19317000	37807000	P11940;Q4VXU2;E7EQV3;P11940-2;A0A087WTT1;Q13310-3;Q13310;Q13310-2;Q9H361;B1ANR0;E7ERJ7;H0Y5F5;Q96DU9;Q96DU9-2;Q4VXU2-2;H0YAR2;H0YEU6;H0YB86;E5RJB9;E5RH24	P11940;Q4VXU2;E7EQV3;P11940-2;A0A087WTT1;Q13310-3;Q13310;Q13310-2;Q9H361;B1ANR0;E7ERJ7;H0Y5F5;Q96DU9;Q96DU9-2;Q4VXU2-2;H0YAR2;H0YEU6;H0YB86;E5RJB9;E5RH24	Polyadenylate-binding protein 1;Polyadenylate-binding protein 1-like;Polyadenylate-binding protein 4;Polyadenylate-binding protein 3;Polyadenylate-binding protein 5	PABPC1;PABPC1L;PABPC4;PABPC3;PABPC5	20
0.91343	1.0195	1.4597				1	3.8	37.92	4982000	2244700	2737300	2537800	1011000	1526700	323760	112240	211520	O15126;A0A087WXB0;A0A087WU14	O15126;A0A087WXB0;A0A087WU14	Secretory carrier-associated membrane protein 1	SCAMP1	3
NaN	NaN	27.397				1	1.4	116.51	0	0	0	0	0	0	134720000	391960	134320000	A0A087WUB1	A0A087WUB1			1
0.92049	NaN	NaN				1	2.1	81.824	118050	42327	75725	0	0	0	0	0	0	A0A087WUH1	A0A087WUH1			1
NaN	NaN	NaN				1	1.8	88.209	0	0	0	0	0	0	0	0	0	A0A087WX23;A0A087WUL4;Q86TG7;A0A087WXK2;B4DSP0;A0A087WZG9;Q86TG7-2	A0A087WX23;A0A087WUL4;Q86TG7;A0A087WXK2;B4DSP0;A0A087WZG9;Q86TG7-2	Retrotransposon-derived protein PEG10	PEG10;hCG_1642748	7
NaN	NaN	NaN				1	3.4	42.942	0	0	0	0	0	0	0	0	0	Q9UNM6-2;A0A087WUL9;Q9UNM6;J3KNQ3;E9PL38;H0YD73	Q9UNM6-2;A0A087WUL9;Q9UNM6;J3KNQ3;E9PL38;H0YD73	26S proteasome non-ATPase regulatory subunit 13	PSMD13	6
0.6524	NaN	NaN				1	4.4	22.106	11801000	6970500	4830700	0	0	0	0	0	0	P07203;A0A087WUQ6	P07203;A0A087WUQ6	Glutathione peroxidase 1	GPX1	2
NaN	NaN	1.1916				1	5.2	32.43	0	0	0	0	0	0	396740	162500	234240	P62847-4;P62847;A0A087WUS0;P62847-3;E7ETK0;P62847-2	P62847-4;P62847;A0A087WUS0;P62847-3;E7ETK0;P62847-2	40S ribosomal protein S24	RPS24	6
1.3533	0.81149	0.94158				2	1.7	138.68	2354900	824810	1530100	5765400	2456400	3309000	4195100	1906000	2289100	A0A087WUT6;O60841	A0A087WUT6;O60841	Eukaryotic translation initiation factor 5B	EIF5B	2
NaN	NaN	NaN				1	3.6	42.2	0	0	0	0	0	0	0	0	0	P35613;P35613-2;A0A087X2B5;P35613-4;A0A087WUV8;P35613-3;I3L192;R4GMX5;R4GN83	P35613;P35613-2;A0A087X2B5;P35613-4;A0A087WUV8;P35613-3;I3L192;R4GMX5;R4GN83	Basigin	BSG	9
NaN	NaN	NaN				1	2.7	46.816	0	0	0	0	0	0	0	0	0	Q9Y5X3;Q5QPE5;Q5QPE4;A0A087WUY5	Q9Y5X3;Q5QPE5;Q5QPE4;A0A087WUY5	Sorting nexin-5	SNX5	4
1.195	1.04	1.1618				6	3.5	274.83	16356000	6416200	9939800	6245700	2309800	3935900	13915000	6351100	7564200	A0A087WUZ3;Q01082;Q01082-2;Q01082-3;F8W6C1;P11277-2;P11277;P11277-3	A0A087WUZ3;Q01082;Q01082-2;Q01082-3;F8W6C1	Spectrin beta chain, brain 1	SPTBN1	8
1.0339	1.1214	1.1278				4	8.4	50.14	47042000	19785000	27257000	39267000	15045000	24222000	54170000	25130000	29039000	P68104;Q5VTE0;A0A087WV01;Q05639;A0A087WVQ9;P68104-2;Q5JR01;A6PW80	P68104;Q5VTE0;A0A087WV01;Q05639;A0A087WVQ9;P68104-2;Q5JR01;A6PW80	Elongation factor 1-alpha 1;Putative elongation factor 1-alpha-like 3;Elongation factor 1-alpha 2	EEF1A1;EEF1A1P5;EEF1A2	8
1.0017	0.72184	0.90937				1	6.1	24.604	5011600	2009700	3001900	4207700	2067500	2140200	7924700	3904700	4020000	P27635;X1WI28;A0A087WV22;F8W7C6	P27635;X1WI28;A0A087WV22;F8W7C6	60S ribosomal protein L10	RPL10	4
NaN	NaN	NaN				1	0.4	426.02	0	0	0	0	0	0	0	0	0	E9PDN5;A0A087WV90	E9PDN5;A0A087WV90		DMD	2
NaN	NaN	NaN				1	6.3	78.69	0	0	0	0	0	0	0	0	0	Q9HBZ2;A0A087WVE9	Q9HBZ2;A0A087WVE9	Aryl hydrocarbon receptor nuclear translocator 2	ARNT2	2
0.99057	1.0613	0.995				10	7.1	192.06	60355000	26007000	34348000	71007000	27397000	43610000	95105000	43300000	51805000	A0A087WVQ6;Q00610;Q00610-2;P53675;P53675-2;A0A087WX41;J3KS13;J3KSQ2;A0A087WXH4;A0A087WV74;K7EJJ5;F5H5N6;J3KRF5	A0A087WVQ6;Q00610;Q00610-2	Clathrin heavy chain 1	CLTC	13
NaN	NaN	NaN				1	4.1	38.405	0	0	0	0	0	0	0	0	0	Q8TAU0;A0A087WVU3	Q8TAU0;A0A087WVU3	Homeobox protein Nkx-2.3	NKX2-3	2
1.056	0.84136	NaN				1	1.1	139.47	1237300	439260	798020	1062200	527000	535210	0	0	0	A0A087X117;A0A0G2JN29;J3KN36;Q5JPE7;P69849;Q15155;Q5JPE7-2;A0A087WW46;A0A0G2JP90;Q5JPE7-3	A0A087X117;A0A0G2JN29;J3KN36;Q5JPE7;P69849;Q15155;Q5JPE7-2;A0A087WW46;A0A0G2JP90;Q5JPE7-3	Nodal modulator 2;Nodal modulator 3;Nodal modulator 1	NOMO2;NOMO3;NOMO1	10
1.2058	1.1299	NaN				3	4.6	105.85	2145700	708480	1437200	355870	122160	233710	0	0	0	A0A087WW66;Q99460;Q99460-2;C9J9M4;H7C378;H7BZR6	A0A087WW66;Q99460;Q99460-2	26S proteasome non-ATPase regulatory subunit 1	PSMD1	6
1.0288	NaN	NaN				1	3.9	26.372	8095700	3335400	4760300	0	0	0	0	0	0	A0A0A6YYL6;P18621-3;A0A0A0MRF8;P18621;J3KRX5;J3QLC8;J3QQT2;A0A087WXM6;P18621-2;J3QS96;A0A087WWH0;J3KRB3;A0A087WY81;J3KSJ0	A0A0A6YYL6;P18621-3;A0A0A0MRF8;P18621;J3KRX5;J3QLC8;J3QQT2;A0A087WXM6;P18621-2;J3QS96;A0A087WWH0;J3KRB3;A0A087WY81;J3KSJ0	60S ribosomal protein L17	RPL17	14
1.3009	1.3579	1.1267				2	8.3	19.398	393890	141670	252220	267700	93784	173910	588680	252140	336550	Q9GZZ1;E7EQ69;C9J5D1;B0AZT5;A0A087WWJ2;Q9GZZ1-2;A0A0D9SF32;C9J5J3	Q9GZZ1;E7EQ69;C9J5D1;B0AZT5;A0A087WWJ2;Q9GZZ1-2;A0A0D9SF32;C9J5J3	N-alpha-acetyltransferase 50	NAA50	8
NaN	NaN	2.3322				1	5.3	21.231	0	0	0	0	0	0	583940	300800	283140	A0A087WWM0;O43617;A6NKE1	A0A087WWM0;O43617;A6NKE1	Trafficking protein particle complex subunit 3	TRAPPC3	3
NaN	NaN	NaN				1	6.8	22.949	0	0	0	0	0	0	0	0	0	P49720;A0A087WY10;A0A087WXQ8	P49720;A0A087WY10;A0A087WXQ8	Proteasome subunit beta type-3	PSMB3	3
NaN	NaN	NaN				1	4.8	38.534	0	0	0	0	0	0	0	0	0	Q9UJZ1;Q9UJZ1-2;A0A087WYB4;F2Z2I8	Q9UJZ1;Q9UJZ1-2;A0A087WYB4;F2Z2I8	Stomatin-like protein 2	STOML2	4
NaN	NaN	6.5627	+			1	0.7	270	0	0	0	0	0	0	6782200	157810	6624400	Q13085-4;A0A087WYK6	Q13085-4;A0A087WYK6			2
1.1047	1.3624	1.2554				2	11.1	16.156	536760	203060	333690	1168200	396290	771870	2533700	1051600	1482100	P09132;A0A087WYR0	P09132;A0A087WYR0	Signal recognition particle 19 kDa protein	SRP19	2
NaN	1.1695	NaN				2	11.4	24.853	0	0	0	5503400	1963000	3540300	0	0	0	O43399-7;A0A087WYR3;O43399-5;O43399-3;O43399;O43399-4;O43399-2;O43399-6;A0A087WZ51	O43399-7;A0A087WYR3;O43399-5;O43399-3;O43399;O43399-4;O43399-2;O43399-6;A0A087WZ51	Tumor protein D54	TPD52L2	9
0.75586	0.8182	0.71889				2	5.6	57.805	21621000	9764700	11857000	46639000	21316000	25323000	27167000	15892000	11275000	E7EUC7;A0A087WYS1;Q16851;Q16851-2;C9JNZ1;C9JQU9;C9JVG3;C9JWG0;C9JUW1;C9JTZ5;F2Z3H1	E7EUC7;A0A087WYS1;Q16851;Q16851-2;C9JNZ1;C9JQU9;C9JVG3;C9JWG0;C9JUW1;C9JTZ5;F2Z3H1	UTP--glucose-1-phosphate uridylyltransferase	UGP2	11
0.87006	1.0142	1.5886				2	12.8	19.155	9301800	4122500	5179200	4235900	1403300	2832700	8135200	3290500	4844700	A0A087WYT3;Q15185;Q15185-4;Q15185-3;Q15185-2;B4DDC6	A0A087WYT3;Q15185;Q15185-4;Q15185-3;Q15185-2;B4DDC6	Prostaglandin E synthase 3	PTGES3	6
NaN	NaN	NaN				2	4.4	52.878	0	0	0	0	0	0	0	0	0	Q96KP4;Q96KP4-2;J3QKT2;A0A087WYZ1;J3KSV5;J3QL02;J3QRA8;J3QRD0;J3QKQ0;J3QLU1;J3QR27;J3QQN6;J3KSS4;J3QRP4	Q96KP4;Q96KP4-2;J3QKT2;A0A087WYZ1;J3KSV5;J3QL02;J3QRA8;J3QRD0;J3QKQ0;J3QLU1;J3QR27;J3QQN6;J3KSS4;J3QRP4	Cytosolic non-specific dipeptidase	CNDP2	14
NaN	0.91058	0.80266				1	5.2	41.581	0	0	0	544310	206120	338190	451960	256150	195820	B3KS98;O15372;A0A087WZK9;E5RGU4;E5RFH0;E5RFW7;E5RH59;E5RHC7	B3KS98;O15372;A0A087WZK9;E5RGU4;E5RFH0;E5RFW7;E5RH59;E5RHC7	Eukaryotic translation initiation factor 3 subunit H	EIF3S3;EIF3H	8
1.0509	1.1976	1.2549				2	7	34.882	24147000	10538000	13609000	30117000	11425000	18692000	31413000	14082000	17331000	P0DME0;A0A087X027;Q01105;Q01105-2;Q01105-4;A0A0C4DFV9;Q01105-3	P0DME0;A0A087X027;Q01105;Q01105-2;Q01105-4;A0A0C4DFV9;Q01105-3	Protein SET	SET	7
1.2625	1.0712	1.0126				3	2.9	111.33	6140900	2367300	3773500	21202000	8670600	12531000	10724000	5148500	5575600	Q9Y4L1;A0A087X054	Q9Y4L1;A0A087X054	Hypoxia up-regulated protein 1	HYOU1	2
NaN	NaN	1.1295				1	1.7	63.86	0	0	0	0	0	0	685700	309150	376550	Q7Z739;A0A087X0Q1;S4R373;A0A087X0C3	Q7Z739;A0A087X0Q1;S4R373;A0A087X0C3	YTH domain family protein 3	YTHDF3	4
NaN	NaN	NaN				1	3.9	37.393	0	0	0	0	0	0	0	0	0	P09668;A0A087X0D5;E9PKT6	P09668;A0A087X0D5;E9PKT6	Pro-cathepsin H;Cathepsin H mini chain;Cathepsin H;Cathepsin H heavy chain;Cathepsin H light chain	CTSH	3
0.23756	NaN	NaN				1	4.4	39.869	2399200	1664300	734890	0	0	0	0	0	0	Q9Y376;A0A087X0K1	Q9Y376;A0A087X0K1	Calcium-binding protein 39	CAB39	2
NaN	NaN	NaN				1	2.4	75.25	0	0	0	0	0	0	0	0	0	O15344;O15344-2;A0A087X255;C9J453;A0A087X0X0;C9JZJ7	O15344;O15344-2;A0A087X255;C9J453;A0A087X0X0;C9JZJ7	Midline-1	MID1	6
1.3479	NaN	NaN				1	3.4	36.748	5385800	1944000	3441800	0	0	0	0	0	0	Q9NUQ9;A0A087X178;E5RI16;E5RJL8;E5RIR8;E5RJE1	Q9NUQ9;A0A087X178;E5RI16;E5RJL8;E5RIR8;E5RJE1	Protein FAM49B	FAM49B	6
1.1811	1.4391	1.0848				1	4.8	24.669	13866000	4954100	8912300	13555000	4734000	8820600	8108300	3658500	4449800	O75608;O75608-2;E5RGR0;B4DP64;A0A087X1K9	O75608;O75608-2;E5RGR0;B4DP64;A0A087X1K9	Acyl-protein thioesterase 1	LYPLA1	5
1.0442	NaN	NaN				1	7.2	41.833	2728900	922370	1806600	0	0	0	0	0	0	O75818;O75818-2;A0A087X1N3;F8WC38	O75818;O75818-2;A0A087X1N3;F8WC38	Ribonuclease P protein subunit p40	RPP40	4
NaN	0.82104	NaN				1	4	42.461	0	0	0	758260	328070	430180	0	0	0	H7C2I1;Q99873;Q99873-4;Q99873-2;Q99873-3;E9PKG1;A0A087X1W2;H0YDE4;E9PIX6;E9PQ98;E9PNR9;E9PMW9	H7C2I1;Q99873;Q99873-4;Q99873-2;Q99873-3;E9PKG1;A0A087X1W2;H0YDE4;E9PIX6;E9PQ98;E9PNR9;E9PMW9	Protein arginine N-methyltransferase 1	PRMT1	12
0.89425	0.84237	NaN				1	4.7	29.126	14197000	6066000	8130900	18796000	8706700	10089000	0	0	0	A0A087X1Z3;Q9UL46;H0YM70	A0A087X1Z3;Q9UL46;H0YM70	Proteasome activator complex subunit 2	PSME2	3
0.93711	0.88436	1.0224				1	2	105.69	10262000	4538200	5723400	20217000	8541200	11676000	18912000	9265000	9647000	P63010-2;P63010;A0A087X253;P63010-3;A0A087WZQ6;A0A087WU93;A0A087WYD1	P63010-2;P63010;A0A087X253;P63010-3;A0A087WZQ6;A0A087WU93;A0A087WYD1	AP-2 complex subunit beta	AP2B1	7
1.0939	NaN	1.1646				1	1.1	146.2	1367300	531000	836330	0	0	0	1486300	607280	878980	O60271;A0A087X2D8;O60271-2;O60271-4;O60271-9	O60271;A0A087X2D8;O60271-2;O60271-4;O60271-9	C-Jun-amino-terminal kinase-interacting protein 4	SPAG9	5
NaN	1.2024	NaN				1	1.4	82.431	0	0	0	15501000	5333900	10167000	0	0	0	Q92499;A0A087X2G1;F1T0B3;Q92499-2;Q92499-3	Q92499;A0A087X2G1;F1T0B3;Q92499-2;Q92499-3	ATP-dependent RNA helicase DDX1	DDX1	5
NaN	NaN	NaN				1	2.7	45.796	0	0	0	0	0	0	0	0	0	A0A087X2I1;P62333	A0A087X2I1;P62333	26S protease regulatory subunit 10B	PSMC6	2
1.3855	1.4445	1.4956				1	3.6	30.376	1649000	558770	1090300	2806900	799280	2007600	1531600	483180	1048400	A0A096LPI6;A0A0B4J2D5;P30042;H7C1F6;A0A0B4J2H4;P30042-2;H7C2G3;A0A096LNH5	A0A096LPI6;A0A0B4J2D5;P30042;H7C1F6;A0A0B4J2H4;P30042-2;H7C2G3;A0A096LNH5	ES1 protein homolog, mitochondrial	C21orf33	8
0.62572	NaN	NaN				1	0.8	115.54	1767300	923830	843510	0	0	0	0	0	0	O76039;O76039-2;A0A1B0GUM4;A0A096LNR9;A0A1B0GTX4	O76039;O76039-2;A0A1B0GUM4;A0A096LNR9;A0A1B0GTX4	Cyclin-dependent kinase-like 5	CDKL5	5
NaN	1.4033	NaN				1	2.8	42.978	0	0	0	3721000	1389100	2331800	0	0	0	A0A0A0MQX8;Q9NR56;Q9NR56-5;Q9NR56-2;C9JP00;Q9NR56-6;Q9NR56-7;Q9NR56-4;Q9NR56-3	A0A0A0MQX8;Q9NR56;Q9NR56-5;Q9NR56-2;C9JP00;Q9NR56-6;Q9NR56-7;Q9NR56-4;Q9NR56-3	Muscleblind-like protein 1	MBNL1	9
NaN	1.3003	NaN				1	6.5	33.371	0	0	0	8885800	2925400	5960400	0	0	0	P45880-1;P45880;P45880-2;A0A0A0MR02	P45880-1;P45880;P45880-2;A0A0A0MR02	Voltage-dependent anion-selective channel protein 2	VDAC2	4
0.016239	0.11145	NaN				2	0.1	3994.6	21759000	21460000	298830	38561	32002	6559.3	0	0	0	A0A0A0MTS7;Q8WZ42-12;Q8WZ42-13;Q8WZ42-8;Q8WZ42;Q8WZ42-2;Q8WZ42-7;Q8WZ42-4;Q8WZ42-11;Q8WZ42-5;A0A0A0MRA3;Q8WZ42-9;Q8WZ42-10;Q8WZ42-3;Q8WZ42-6	A0A0A0MTS7;Q8WZ42-12;Q8WZ42-13;Q8WZ42-8;Q8WZ42;Q8WZ42-2;Q8WZ42-7;Q8WZ42-4;Q8WZ42-11;Q8WZ42-5;A0A0A0MRA3;Q8WZ42-9;Q8WZ42-10;Q8WZ42-3;Q8WZ42-6	Titin	TTN	15
1.1621	1.0639	1.0949				1	0.9	95.737	8981700	3527500	5454200	12030000	4570100	7459800	52591000	20355000	32236000	Q9BUJ2;Q9BUJ2-2;B7Z4B8;A0A0A0MRA5;Q9BUJ2-4;M0R3F1;M0QYZ0;M0QYI8;M0QYM5	Q9BUJ2;Q9BUJ2-2;B7Z4B8;A0A0A0MRA5;Q9BUJ2-4;M0R3F1;M0QYZ0;M0QYI8;M0QYM5	Heterogeneous nuclear ribonucleoprotein U-like protein 1	HNRNPUL1	9
NaN	1.1434	NaN				1	2.6	47.804	0	0	0	8638300	3270100	5368200	0	0	0	A0A0A0MRI2;Q9UNH7;Q9UNH7-2;G3V5X9	A0A0A0MRI2;Q9UNH7;Q9UNH7-2;G3V5X9	Sorting nexin-6	SNX6	4
1.1103	0.93272	1.1176				2	1.1	202.81	2629900	1042400	1587500	4199800	1734200	2465600	44433000	16654000	27778000	Q5VT25-6;Q5VT25-2;Q5VT25;Q5VT25-5;A0A0A0MRJ0;Q5VT25-4;Q5VT25-3;H0Y5V1;A0A0A0MRJ1	Q5VT25-6;Q5VT25-2;Q5VT25;Q5VT25-5;A0A0A0MRJ0;Q5VT25-4;Q5VT25-3;H0Y5V1;A0A0A0MRJ1	Serine/threonine-protein kinase MRCK alpha	CDC42BPA	9
1.2213	NaN	NaN				1	0.8	149.87	124050	47530	76519	0	0	0	0	0	0	E7EW20;A0A0D9SGC1;Q9UM54;Q9UM54-1;Q9UM54-4;Q9UM54-6;Q9UM54-2;A0A0A0MRM8;Q9UM54-5	E7EW20;A0A0D9SGC1;Q9UM54;Q9UM54-1;Q9UM54-4;Q9UM54-6;Q9UM54-2;A0A0A0MRM8;Q9UM54-5	Unconventional myosin-VI	MYO6	9
NaN	NaN	NaN				1	6.7	19.687	0	0	0	0	0	0	0	0	0	A0A0A0MRR7;P09234	A0A0A0MRR7;P09234	U1 small nuclear ribonucleoprotein C	SNRPC	2
1.0594	1.1977	1.2615				7	6.4	152.45	5887600	2451800	3435800	17672000	6877700	10794000	24506000	9973700	14532000	A0A0A0MRV0;Q9P2E9;Q9P2E9-2;Q9P2E9-3;A0A087WVV2;F8W7S5;A0A087WU26;A2A2S5	A0A0A0MRV0;Q9P2E9;Q9P2E9-2;Q9P2E9-3;A0A087WVV2;F8W7S5	Ribosome-binding protein 1	RRBP1	8
NaN	1.4784	1.6156				2	2.5	117.51	0	0	0	24781000	9001700	15780000	17093000	6276400	10816000	Q5JRX3-2;Q5JRX3;Q5JRX3-3;A0A0A0MRX9;B1APQ0	Q5JRX3-2;Q5JRX3;Q5JRX3-3;A0A0A0MRX9;B1APQ0	Presequence protease, mitochondrial	PITRM1	5
NaN	0.93647	0.80969			+	4	8.1	85.696	0	0	0	16252000	6641100	9611000	17833000	9659500	8173500	P06396;A0A0A0MT01;A0A0A0MS51;P06396-3;P06396-4;P06396-2;CON__Q3SX14	P06396;A0A0A0MT01;A0A0A0MS51;P06396-3;P06396-4;P06396-2;CON__Q3SX14	Gelsolin	GSN	7
NaN	NaN	NaN				1	0.6	290.54	0	0	0	0	0	0	0	0	0	J3KNF5;O15078;A0A0A0MS86;F8VS29;F8W097;F8W0V9	J3KNF5;O15078;A0A0A0MS86;F8VS29;F8W097;F8W0V9	Centrosomal protein of 290 kDa	CEP290	6
NaN	NaN	NaN				1	2.6	42.123	0	0	0	0	0	0	0	0	0	A0A0A0MSE2;Q16836-2;Q16836-3;E9PF18;Q16836	A0A0A0MSE2;Q16836-2;Q16836-3;E9PF18;Q16836	Hydroxyacyl-coenzyme A dehydrogenase, mitochondrial	HADH	5
0.98179	1.5472	0.96555				2	4	70.81	39120000	16795000	22325000	16973000	6570900	10402000	59290000	27453000	31837000	P13797;A0A0A0MSQ0;P13797-2;P13797-3;P13796;H7C4N2	P13797;A0A0A0MSQ0;P13797-2;P13797-3;P13796;H7C4N2	Plastin-3;Plastin-2	PLS3;LCP1	6
0.96704	NaN	NaN				1	9	36.867	17462000	7602200	9859400	0	0	0	0	0	0	A0A0A0MSS8;P42330;S4R3Z2;S4R3D5;P17516;H0Y804;A6NHU4	A0A0A0MSS8;P42330;S4R3Z2;S4R3D5;P17516;H0Y804;A6NHU4	Aldo-keto reductase family 1 member C3;Aldo-keto reductase family 1 member C4	AKR1C3;AKR1C4;AKR1C1	7
NaN	NaN	NaN				1	1	140.76	0	0	0	0	0	0	0	0	0	Q9Y6M7-7;Q9Y6M7-8;Q9Y6M7;E9PFN4;Q9Y6M7-12;A0A0A0MST8;Q9Y6M7-13;Q9Y6M7-6;Q9Y6M7-9;Q9Y6M7-2;C9JRP1;Q9Y6M7-3;Q9Y6M7-4;H7C3C4;Q9Y6M7-5	Q9Y6M7-7;Q9Y6M7-8;Q9Y6M7;E9PFN4;Q9Y6M7-12;A0A0A0MST8;Q9Y6M7-13;Q9Y6M7-6;Q9Y6M7-9;Q9Y6M7-2;C9JRP1;Q9Y6M7-3;Q9Y6M7-4;H7C3C4;Q9Y6M7-5	Sodium bicarbonate cotransporter 3	SLC4A7	15
NaN	1.3345	NaN				1	0.3	575.95	0	0	0	311240	107270	203970	0	0	0	Q5T4S7-2;Q5T4S7;Q5T4S7-3;A0A0A0MSW0	Q5T4S7-2;Q5T4S7;Q5T4S7-3;A0A0A0MSW0	E3 ubiquitin-protein ligase UBR4	UBR4	4
1.4081	NaN	1.5612				2	2	144.5	10112000	3857700	6254500	0	0	0	14029000	6137900	7890800	P41252;A0A0A0MSX9;J3KR24	P41252;A0A0A0MSX9;J3KR24	Isoleucine--tRNA ligase, cytoplasmic	IARS	3
2.3633	2.4626	2.0284				2	6.2	58.217	38571000	8728400	29843000	30100000	6309200	23791000	58803000	16307000	42495000	A0A0A0MT64;P22570-3;A0A0A0MSZ4;P22570-7;A0A0C4DGN7;P22570-2;A0A0C4DFN8;P22570;A0A0A0MTR6;P22570-5;J3QQX3;P22570-6;J3QQW7;J3KS64	A0A0A0MT64;P22570-3;A0A0A0MSZ4;P22570-7;A0A0C4DGN7;P22570-2;A0A0C4DFN8;P22570;A0A0A0MTR6;P22570-5;J3QQX3;P22570-6;J3QQW7;J3KS64	NADPH:adrenodoxin oxidoreductase, mitochondrial	FDXR	14
0.67343	NaN	0.48535				1	0.2	596.48	4001200	2270200	1731000	0	0	0	3136100	1494200	1641900	A0A0A0MTC1;Q63HN8-4;A0A0A0MTR7;Q63HN8;Q63HN8-5	A0A0A0MTC1;Q63HN8-4;A0A0A0MTR7;Q63HN8;Q63HN8-5	E3 ubiquitin-protein ligase RNF213	RNF213	5
0.76648	0.75914	NaN				1	1.4	89.491	58717	25840	32877	55043	23425	31619	0	0	0	Q13617-2;A0A0A0MTN0;Q13617;Q5T2B5	Q13617-2;A0A0A0MTN0;Q13617;Q5T2B5	Cullin-2	CUL2	4
0.91239	0.87183	0.9295				8	17.6	64.824	354720000	158760000	195960000	418620000	186970000	231650000	494880000	239270000	255600000	A0A0A0MTS2;P06744-2;P06744;K7EQ48;A0A0J9YYH3;A0A0J9YX90;A0A0J9YXP8;CON__Q3ZBD7;K7EPY4;K7EP41	A0A0A0MTS2;P06744-2;P06744;K7EQ48;A0A0J9YYH3;A0A0J9YX90;A0A0J9YXP8	Glucose-6-phosphate isomerase	GPI	10
NaN	1.0379	NaN				1	3	46.172	0	0	0	12978000	4546800	8431000	0	0	0	Q86XR7-2;Q9Y3B3;A0A0A6YYA0;Q9Y3B3-2	Q86XR7-2;Q9Y3B3;A0A0A6YYA0;Q9Y3B3-2	Transmembrane emp24 domain-containing protein 7	TMED7	4
NaN	1.5382	NaN				1	3.3	54.223	0	0	0	3700800	1139100	2561700	0	0	0	A0A0A6YYJ8;Q96HJ9-2;Q9Y383;Q9Y383-2;Q9Y383-3	A0A0A6YYJ8;Q96HJ9-2;Q9Y383;Q9Y383-2;Q9Y383-3	Putative RNA-binding protein Luc7-like 2	LUC7L2	5
6.4848	NaN	127.01				1	17	11.695	59135	3570.1	55565	0	0	0	232140000	270770	231870000	A0A0B4J1R7	A0A0B4J1R7			1
0.71026	0.6268	NaN				1	1.3	101.27	3420200	1340300	2080000	5064700	1709300	3355300	0	0	0	Q9BXJ9;A0A0B4J1W3;Q6N069;Q6N069-2;Q9BXJ9-4;Q6N069-3;Q6N069-4;Q6N069-5	Q9BXJ9;A0A0B4J1W3;Q6N069;Q6N069-2;Q9BXJ9-4;Q6N069-3;Q6N069-4;Q6N069-5	N-alpha-acetyltransferase 15, NatA auxiliary subunit;N-alpha-acetyltransferase 16, NatA auxiliary subunit	NAA15;NAA16	8
0.59988	NaN	NaN				1	4.1	34.809	1497300	875840	621490	0	0	0	0	0	0	A0A0B4J207;P21108;P60891;B1ALA7	A0A0B4J207;P21108;P60891;B1ALA7	Ribose-phosphate pyrophosphokinase 3;Ribose-phosphate pyrophosphokinase 1	PRPS1L1;PRPS1	4
NaN	NaN	NaN				1	12.1	23.15	0	0	0	4350800	4350800	0	0	0	0	A0A0B4J231;B9A064;P0CG04;P0DOY2	A0A0B4J231;B9A064;P0CG04;P0DOY2	Immunoglobulin lambda-like polypeptide 5;Ig lambda-1 chain C regions	IGLL5;IGLC1	4
NaN	NaN	0.45273				1	11.6	12.465	0	0	0	0	0	0	7013500	5865000	1148500	A0A0B4J273	A0A0B4J273			1
NaN	0.95457	1.0543				1	5	17.911	0	0	0	7071000	2994300	4076800	13978000	6177200	7800600	Q15370-2;I3L0M9;Q15370;B8ZZU8;A0A0B4J296	Q15370-2;I3L0M9;Q15370;B8ZZU8;A0A0B4J296	Transcription elongation factor B polypeptide 2	TCEB2	5
NaN	1.7002	NaN				1	4.5	41.924	0	0	0	4898500	1494400	3404000	0	0	0	P42765;A0A0B4J2A4;K7EME0	P42765;A0A0B4J2A4;K7EME0	3-ketoacyl-CoA thiolase, mitochondrial	ACAA2	3
0.76313	1.1642	1.0047				1	7.9	17.723	1588400	685010	903370	1011500	355190	656300	954780	440370	514410	K7ELC2;P62841;K7EQJ5;S4R417;K7EJ78;A0A0B4J2B4;K7EM56;S4R456	K7ELC2;P62841;K7EQJ5;S4R417;K7EJ78;A0A0B4J2B4;K7EM56;S4R456	40S ribosomal protein S15	RPS15	8
1.6599	3.0955	2.4336				2	13.1	24.75	8594400	1585600	7008800	21320000	3670300	17649000	16766000	2468300	14298000	A0A0C4DFU2;P04179;F5GYZ5;F5H4R2;P04179-4;A0A0C4DG56;P04179-3;F5H3C5;A0A0C4DFU1;P04179-2;F5GXZ9;G5E9P6;G8JLJ2	A0A0C4DFU2;P04179;F5GYZ5;F5H4R2;P04179-4;A0A0C4DG56;P04179-3;F5H3C5;A0A0C4DFU1;P04179-2;F5GXZ9;G5E9P6;G8JLJ2	Superoxide dismutase [Mn], mitochondrial	SOD2	13
0.77523	1.4909	NaN				1	0.1	1011.1	21246000	7815800	13430000	23486000	7635300	15850000	0	0	0	Q8NF91;A0A0C4DG40;Q8NF91-4;E7ENN3;Q8NF91-2;Q8NF91-8	Q8NF91;A0A0C4DG40;Q8NF91-4;E7ENN3;Q8NF91-2;Q8NF91-8	Nesprin-1	SYNE1	6
NaN	NaN	NaN				1	1.9	117.46	0	0	0	0	0	0	0	0	0	A0A0C4DG89;Q7L014	A0A0C4DG89;Q7L014	Probable ATP-dependent RNA helicase DDX46	DDX46	2
NaN	NaN	NaN				2	5.1	84.942	0	0	0	0	0	0	0	0	0	P20810-6;P20810-7;P20810-10;P20810-5;A0A0C4DGB5;P20810-9;P20810;P20810-2;B7Z574;E7EVY3;P20810-8;E9PCH5;P20810-4;E7ES10;E9PDE4;P20810-3;H0Y9H6;H0YD33;H0Y7F0;E7EQA0;A0A0A0MR45;E7EQ12;F8W7E0;E9PSG1;H0Y944	P20810-6;P20810-7;P20810-10;P20810-5;A0A0C4DGB5;P20810-9;P20810;P20810-2;B7Z574;E7EVY3;P20810-8;E9PCH5;P20810-4;E7ES10;E9PDE4;P20810-3;H0Y9H6;H0YD33;H0Y7F0;E7EQA0;A0A0A0MR45;E7EQ12;F8W7E0;E9PSG1;H0Y944	Calpastatin	CAST	25
1.4529	2.0806	1.6059				2	2.6	132.82	773680	245340	528350	2141800	646370	1495500	489680	166730	322950	Q8IX12;Q8IX12-2;A0A0C4DGG8;F5H2E6;F5H1H2;H0YFJ7	Q8IX12;Q8IX12-2;A0A0C4DGG8;F5H2E6;F5H1H2;H0YFJ7	Cell division cycle and apoptosis regulator protein 1	CCAR1	6
NaN	NaN	1.0313				1	0.9	220.85	0	0	0	0	0	0	201190	95109	106080	Q14839-2;A0A0C4DGG9;Q14839;F5GWX5;F5H6N4	Q14839-2;A0A0C4DGG9;Q14839;F5GWX5;F5H6N4	Chromodomain-helicase-DNA-binding protein 4	CHD4	5
NaN	NaN	1.7974				1	2.4	51.712	0	0	0	0	0	0	59452000	20258000	39195000	O75390;B4DJV2;A0A0C4DGI3;H0YIC4	O75390;B4DJV2;A0A0C4DGI3;H0YIC4	Citrate synthase, mitochondrial;Citrate synthase	CS	4
1.0051	NaN	NaN				1	0.8	144.35	217270	116890	100380	0	0	0	0	0	0	Q13635-4;A0A0C4DGI4;F8VQS6;F8VPA3	Q13635-4;A0A0C4DGI4;F8VQS6;F8VPA3		PTCH1	4
1.3154	1.077	1.1846				3	11	35.554	26093000	9996900	16096000	26484000	9813600	16670000	22412000	9614200	12797000	P27695;G3V3M6;G3V5Q1;G3V3C7;A0A0C4DGK8;G3V5D9;G3V359;G3V5M0;G3V3Y6	P27695;G3V3M6;G3V5Q1;G3V3C7;A0A0C4DGK8;G3V5D9	DNA-(apurinic or apyrimidinic site) lyase;DNA-(apurinic or apyrimidinic site) lyase, mitochondrial	APEX1	9
0.7077	0.82871	NaN				2	5	33.786	54728000	25884000	28843000	32984000	14044000	18940000	0	0	0	A0A0C4DGQ5;K7ELJ7;P04632;K7EKD8;Q96L46;A0A075B7C0;K7EIV0;K7EM73;U3KQE2;U3KPR7;K7EMQ1;K7ES78	A0A0C4DGQ5;K7ELJ7;P04632;K7EKD8;Q96L46;A0A075B7C0;K7EIV0;K7EM73;U3KQE2;U3KPR7;K7EMQ1;K7ES78	Calpain small subunit 1;Calpain small subunit 2	CAPNS1;CAPNS2	12
1.9161	NaN	1.5054				1	2.1	59.143	3119600	862920	2256600	0	0	0	6448300	3568300	2880000	P54577;A0A0C4DGZ5	P54577;A0A0C4DGZ5	Tyrosine--tRNA ligase, cytoplasmic	YARS	2
0.95656	0.90964	1.7028				1	1.4	98.502	1183400	565140	618280	2310700	987410	1323300	15757000	4198900	11558000	Q9H4G0;A0A0C4DH22;Q4VXN5;Q4VXN6;Q4VXN7;Q4VXN8	Q9H4G0;A0A0C4DH22;Q4VXN5;Q4VXN6;Q4VXN7;Q4VXN8	Band 4.1-like protein 1	EPB41L1	6
NaN	0.83774	0.79074				1	2.1	68.965	0	0	0	9583900	4520500	5063400	5944700	3035100	2909600	Q01844-5;Q01844;Q01844-3;C9JGE3;B0QYK0;Q01844-6;A0A0D9SFL3;Q01844-2;H7BY36	Q01844-5;Q01844;Q01844-3;C9JGE3;B0QYK0;Q01844-6;A0A0D9SFL3;Q01844-2;H7BY36	RNA-binding protein EWS	EWSR1	9
NaN	2.3617	NaN				1	1.2	117.66	0	0	0	3163600	458770	2704800	0	0	0	E9PCR7;E9PDF2;Q02218;Q02218-2;Q9ULD0;A0A0D9SFS3;Q9ULD0-2;E9PFG7;Q9ULD0-3;Q02218-3	E9PCR7;E9PDF2;Q02218;Q02218-2;Q9ULD0;A0A0D9SFS3;Q9ULD0-2;E9PFG7;Q9ULD0-3;Q02218-3	2-oxoglutarate dehydrogenase, mitochondrial;2-oxoglutarate dehydrogenase-like, mitochondrial	OGDH;OGDHL	10
NaN	NaN	NaN				1	0.9	138.78	0	0	0	0	0	0	0	0	0	A0A0G2JK64;A2ABF9;A0A0G2JIR1;A2ABF8;Q96KQ7;A0A0G2JIS2;Q96KQ7-2;A0A0G2JRN8;A0A0G2JRR0	A0A0G2JK64;A2ABF9;A0A0G2JIR1;A2ABF8;Q96KQ7;A0A0G2JIS2;Q96KQ7-2;A0A0G2JRN8;A0A0G2JRR0	Histone-lysine N-methyltransferase EHMT2	EHMT2	9
1.3575	1.2661	1.333				6	16.8	70.108	165620000	59462000	106160000	106150000	41599000	64548000	280430000	120830000	159600000	A0A0G2JIW1;P0DMV8;P0DMV9;P0DMV8-2;P34931;Q53FA3;V9GZ37	A0A0G2JIW1;P0DMV8;P0DMV9;P0DMV8-2;P34931;Q53FA3;V9GZ37	Heat shock 70 kDa protein 1-like	HSPA1L	7
1.7885	1.6382	1.5614				1	2.7	50.679	20037000	6154800	13882000	30084000	8756900	21327000	17115000	9192000	7922900	Q13838-2;Q13838;O00148;Q5STU3;A0A0G2JJZ9;A0A140T9X3;O00148-2;F6WLT2;A0A140TA18;F6UJC5;A0A140T996;H0Y400;A0A140T9X9;H0YCC6	Q13838-2;Q13838;O00148;Q5STU3;A0A0G2JJZ9;A0A140T9X3;O00148-2;F6WLT2;A0A140TA18;F6UJC5;A0A140T996;H0Y400;A0A140T9X9;H0YCC6	Spliceosome RNA helicase DDX39B;ATP-dependent RNA helicase DDX39A	DDX39B;DDX39A;BAT1	14
NaN	1.2422	NaN	+			1	2.9	39.919	0	0	0	2653400	1147600	1505800	0	0	0	A0A0G2JMW4;Q02833;A0A0G2JLR5;Q02833-2;Q02833-3;A0A0J9YYE4;F8W7Q0;E9PM39	A0A0G2JMW4;Q02833;A0A0G2JLR5;Q02833-2;Q02833-3;A0A0J9YYE4;F8W7Q0;E9PM39	Ras association domain-containing protein 7	RASSF7	8
NaN	0.83251	NaN				2	10.5	17.718	0	0	0	9438200	4251500	5186700	0	0	0	P62269;Q5GGW2;A0A0G2JQH2	P62269;Q5GGW2;A0A0G2JQH2	40S ribosomal protein S18	RPS18	3
NaN	NaN	NaN				1	1.2	114.76	0	0	0	0	0	0	0	0	0	Q9H2U1;Q9H2U1-2;Q9H2U1-3;E7EWK3;A0A0G2JQU7;A0A0G2JRP3	Q9H2U1;Q9H2U1-2;Q9H2U1-3;E7EWK3;A0A0G2JQU7;A0A0G2JRP3	Probable ATP-dependent RNA helicase DHX36	DHX36	6
2.1834	1.5775	0.76726				1	2.9	59.875	1270500	321250	949240	2631000	1041600	1589500	5601900	2879700	2722100	Q9UHX1;A0A0J9YXX5;Q9UHX1-2;A0A0J9YVP6;Q9UHX1-5;A0A0J9YXJ8;Q9UHX1-3;Q9UHX1-6;A0A0J9YYL3;Q9UHX1-4;H0YEM1;A0A0J9YWM1;E9PQ56;A0A0J9YVR6;E9PN18;E9PMU7;E9PL19	Q9UHX1;A0A0J9YXX5;Q9UHX1-2;A0A0J9YVP6;Q9UHX1-5;A0A0J9YXJ8;Q9UHX1-3;Q9UHX1-6;A0A0J9YYL3;Q9UHX1-4;H0YEM1;A0A0J9YWM1;E9PQ56;A0A0J9YVR6;E9PN18;E9PMU7;E9PL19	Poly(U)-binding-splicing factor PUF60	PUF60	17
NaN	0.64699	0.90739				1	3.5	50.519	0	0	0	107110	69877	37230	45238	22551	22686	Q9HD26;Q9HD26-2;F5H1Y4;Q9HD26-3;A0A0J9YVX5	Q9HD26;Q9HD26-2;F5H1Y4;Q9HD26-3;A0A0J9YVX5	Golgi-associated PDZ and coiled-coil motif-containing protein	GOPC	5
NaN	NaN	NaN				1	3.2	41.527	0	0	0	0	0	0	0	0	0	A0A0J9YXF2;A0A0J9YYG4;Q15165;Q15165-1;J3QT77;Q15165-3;G3XAK4;A0A0J9YXU7	A0A0J9YXF2;A0A0J9YYG4;Q15165;Q15165-1;J3QT77;Q15165-3;G3XAK4;A0A0J9YXU7	Serum paraoxonase/arylesterase 2	PON2	8
0.84121	0.85708	0.81923				6	3.2	273.42	27922000	12957000	14964000	32078000	14466000	17612000	9051400	4713600	4337800	P49327;A0A0U1RQF0;A0A0U1RRG3;A0A1B0GTR5	P49327;A0A0U1RQF0	Fatty acid synthase;[Acyl-carrier-protein] S-acetyltransferase;[Acyl-carrier-protein] S-malonyltransferase;3-oxoacyl-[acyl-carrier-protein] synthase;3-oxoacyl-[acyl-carrier-protein] reductase;3-hydroxypalmitoyl-[acyl-carrier-protein] dehydratase;Enoyl-[acyl-carrier-protein] reductase;Oleoyl-[acyl-carrier-protein] hydrolase	FASN	4
0.011089	NaN	NaN				2	1.8	129.93	266810000	261700000	5113000	0	0	0	0	0	0	Q9NQC3;Q9NQC3-6;Q9NQC3-4;Q9NQC3-5;Q9NQC3-2;F8W914;H7C106;Q9NQC3-3;A0A0U1RQR6	Q9NQC3;Q9NQC3-6;Q9NQC3-4;Q9NQC3-5;Q9NQC3-2;F8W914;H7C106;Q9NQC3-3;A0A0U1RQR6	Reticulon-4	RTN4	9
NaN	0.9656	NaN				1	1.9	87.798	0	0	0	1733000	672970	1060000	0	0	0	P47897;P47897-2;A0A1B0GVU9;B4DDN1;H7C0R3;A0A0U1RQX5;A0A0U1RRC8	P47897;P47897-2;A0A1B0GVU9;B4DDN1;H7C0R3;A0A0U1RQX5;A0A0U1RRC8	Glutamine--tRNA ligase	QARS	7
0.89915	0.81048	0.87567				1	0.6	214.11	7517300	2307500	5209800	30492000	13724000	16768000	34201000	18208000	15993000	Q5T5P2;Q5T5P2-3;Q5T5P2-10;Q5T5P2-6;A0A0U1RRK8	Q5T5P2;Q5T5P2-3;Q5T5P2-10;Q5T5P2-6;A0A0U1RRK8	Sickle tail protein homolog	SKT	5
1.5107	1.3103	1.2939				3	9.4	62.463	42233000	13667000	28567000	61713000	21335000	40378000	85711000	35065000	50646000	A0A0U1RRM4;P26599-3;P26599-2;P26599;A6NLN1;K7EKJ7;O95758-4;O95758-5;O95758;O95758-2;O95758-6;O95758-1;K7EK45;A0A087WU68;A0A0D9SF20;X6R242;K7ES59;K7ELW5	A0A0U1RRM4;P26599-3;P26599-2;P26599;A6NLN1;K7EKJ7	Polypyrimidine tract-binding protein 1	PTBP1	18
NaN	NaN	NaN				1	2.7	87.399	0	0	0	0	0	0	0	0	0	A0A0U1RRM6;Q8N8S7;Q8N8S7-2;Q8N8S7-3	A0A0U1RRM6;Q8N8S7;Q8N8S7-2;Q8N8S7-3	Protein enabled homolog	ENAH	4
1.3571	1.3427	1.2754				1	0.9	140.47	853920	323660	530260	657190	221370	435820	234710	86745	147970	P26640;A0A140T936;A0A140T954	P26640;A0A140T936;A0A140T954	Valine--tRNA ligase	VARS	3
NaN	1.2608	NaN				1	3.5	47.355	0	0	0	792490	300820	491680	0	0	0	O75955;O75955-2;A0A140T9R1;A0A140T9W4;A0A140T974	O75955;O75955-2;A0A140T9R1;A0A140T9W4;A0A140T974	Flotillin-1	FLOT1	5
NaN	NaN	1.2528				1	2.7	60.032	0	0	0	0	0	0	8971700	3859800	5111900	A0A1B0GW77;A0A1B0GW82;P49419;A0A1B0GTG2;A0A1B0GUA1;P49419-2;A0A140T9V3;A0A1B0GTJ4;A0A1B0GTY9;P49419-4;A0A1B0GV49	A0A1B0GW77;A0A1B0GW82;P49419;A0A1B0GTG2;A0A1B0GUA1;P49419-2;A0A140T9V3;A0A1B0GTJ4;A0A1B0GTY9;P49419-4;A0A1B0GV49	Alpha-aminoadipic semialdehyde dehydrogenase	ALDH7A1	11
0.70305	0.70506	0.67807				4	8.1	62.701	372430000	188130000	184300000	343830000	163210000	180620000	172610000	94880000	77729000	A0A1B0GU03;A0A1B0GU92;P07339;A0A1B0GWE8;A0A1B0GVD5;A0A1B0GV23;A0A1B0GW44;A0A1B0GVP3;H7C469;H7C1V0;C9JH19;F8WD96;F8W787;A0A1B0GVF1	A0A1B0GU03;A0A1B0GU92;P07339;A0A1B0GWE8;A0A1B0GVD5;A0A1B0GV23;A0A1B0GW44;A0A1B0GVP3;H7C469;H7C1V0	Cathepsin D;Cathepsin D light chain;Cathepsin D heavy chain	CTSD	14
NaN	NaN	2.364				1	2.3	42.814	0	0	0	0	0	0	156540	53317	103220	O75526;P38159;Q96E39;P38159-2;H3BT71;P38159-3;A0A1B0GUK8;H3BR27;H3BNC1	O75526;P38159;Q96E39;P38159-2;H3BT71;P38159-3;A0A1B0GUK8;H3BR27;H3BNC1	RNA-binding motif protein, X-linked-like-2;RNA-binding motif protein, X chromosome;RNA-binding motif protein, X chromosome, N-terminally processed;RNA binding motif protein, X-linked-like-1;RNA binding motif protein, X-linked-like-1, N-terminally processed	RBMXL2;RBMX;RBMXL1	9
NaN	NaN	NaN				1	5.2	17.875	0	0	0	0	0	0	0	0	0	A0A1B0GUS4;P68036;P68036-2	A0A1B0GUS4;P68036;P68036-2	Ubiquitin-conjugating enzyme E2 L3	UBE2L3	3
NaN	3.9861	NaN				1	3	54.548	0	0	0	2015700	431460	1584300	0	0	0	A0A1B0GUW5;Q6XE24;C9JIJ9;Q6XE24-2;Q6XE24-5;Q6XE24-4;Q6XE24-3;P29558;P29558-2;F6Y5H0;E7ETU5;C9J9B2;E7EPF2	A0A1B0GUW5;Q6XE24;C9JIJ9;Q6XE24-2;Q6XE24-5;Q6XE24-4;Q6XE24-3;P29558;P29558-2;F6Y5H0;E7ETU5;C9J9B2;E7EPF2	RNA-binding motif, single-stranded-interacting protein 3;RNA-binding motif, single-stranded-interacting protein 1	RBMS3;RBMS1	13
NaN	NaN	NaN				2	6.1	34.324	0	0	0	0	0	0	0	0	0	Q53GQ0;A0A1B0GV93;A0A1B0GVY6;E9PI21;Q53GQ0-2	Q53GQ0;A0A1B0GV93;A0A1B0GVY6;E9PI21;Q53GQ0-2	Estradiol 17-beta-dehydrogenase 12	HSD17B12	5
NaN	NaN	NaN				1	1.8	271.61	0	0	0	0	0	0	0	0	0	Q9Y4G6;A0A1B0GVU7;A0A1C7CYV7;H0YMT1	Q9Y4G6;A0A1B0GVU7;A0A1C7CYV7;H0YMT1	Talin-2	TLN2	4
1.2445	NaN	NaN				1	3.1	45.671	4989700	1827400	3162300	0	0	0	0	0	0	P52597;A0A1B0GW42	P52597;A0A1B0GW42	Heterogeneous nuclear ribonucleoprotein F;Heterogeneous nuclear ribonucleoprotein F, N-terminally processed	HNRNPF	2
1.3229	NaN	1.2665				1	5	27.872	1097900	345200	752710	0	0	0	836200	341340	494860	P0DN76;Q01081;Q01081-2;Q8WU68;Q8WU68-2;Q8WU68-3;M0R2N4;Q01081-3;M0QYK5;K7EJM7;A0A1B0GW87;K7EJH3	P0DN76;Q01081;Q01081-2;Q8WU68;Q8WU68-2;Q8WU68-3;M0R2N4;Q01081-3;M0QYK5;K7EJM7;A0A1B0GW87;K7EJH3	Splicing factor U2AF 35 kDa subunit;Splicing factor U2AF 26 kDa subunit	U2AF1;U2AF1L4	12
NaN	0.75433	0.565				1	1.4	72.911	0	0	0	1592200	685380	906850	5688600	3469000	2219600	O00116;A0A1B0GWA2	O00116;A0A1B0GWA2	Alkyldihydroxyacetonephosphate synthase, peroxisomal	AGPS	2
NaN	1.1001	NaN				1	5.1	36.032	0	0	0	675150	225390	449760	0	0	0	P30519;I3L1F5;I3L159;I3L463;A0A1B0GXH0;I3L4P8;I3L276	P30519;I3L1F5;I3L159;I3L463;A0A1B0GXH0;I3L4P8;I3L276	Heme oxygenase 2	HMOX2	7
NaN	NaN	0.89353				2	10.1	34.759	0	0	0	0	0	0	687440	340980	346460	Q9H098-2;Q9H098;A0A1C7CYX8;C9JW51;C9JQ40;C9J6N5;C9J3Q3;C9JP05;X6RET8;C9J6Y8;C9JYP1;F8WCJ2	Q9H098-2;Q9H098;A0A1C7CYX8;C9JW51;C9JQ40;C9J6N5;C9J3Q3;C9JP05;X6RET8;C9J6Y8;C9JYP1;F8WCJ2	Protein FAM107B	FAM107B	12
0.64747	0.48162	1.2256				2	5.8	73.502	2702000	1350300	1351700	1885800	797350	1088400	13767000	6004900	7762300	A0A1C7CYX9;Q16555;Q16555-2;Q14194-2;Q14195-2;Q14194;E9PD68;Q14195;H0YBT4	A0A1C7CYX9;Q16555;Q16555-2;Q14194-2;Q14195-2;Q14194;E9PD68;Q14195;H0YBT4	Dihydropyrimidinase-related protein 2;Dihydropyrimidinase-related protein 1;Dihydropyrimidinase-related protein 3	DPYSL2;CRMP1;DPYSL3	9
NaN	NaN	0.85801				1	3.4	64.098	0	0	0	0	0	0	340940	171310	169630	A0AV96;A0AV96-2;D6R9D6;D6RBS9;D6REZ6;D6R9M7;D6RFL5;D6RA49;D6RBP6;D6RCT1	A0AV96;A0AV96-2;D6R9D6;D6RBS9;D6REZ6;D6R9M7;D6RFL5;D6RA49;D6RBP6;D6RCT1	RNA-binding protein 47	RBM47	10
0.96361	NaN	1.1067				1	1	117.97	2138300	933290	1205000	0	0	0	3076500	1393300	1683200	A0AVT1;A0AVT1-2;H0Y8S8	A0AVT1;A0AVT1-2;H0Y8S8	Ubiquitin-like modifier-activating enzyme 6	UBA6	3
NaN	NaN	NaN				1	9.2	20.324	0	0	0	0	0	0	0	0	0	A1KXE4;A1KXE4-2	A1KXE4;A1KXE4-2	Protein FAM168B	FAM168B	2
1.1741	1.6387	1.3475				1	1.5	87.819	5353800	1923800	3430000	13067000	3383600	9683500	15010000	5459900	9550300	A2A274;Q99798	A2A274;Q99798	Aconitate hydratase, mitochondrial	ACO2	2
1.2508	1.3101	1.2482				1	1.4	92.501	16634000	6291600	10343000	21181000	6946100	14235000	30193000	12547000	17645000	Q5SZL2-4;Q5SZL2;A2A3P3	Q5SZL2-4;Q5SZL2;A2A3P3	Centrosomal protein of 85 kDa-like	CEP85L;C6orf204	3
NaN	1.0714	NaN				1	3.9	40.578	0	0	0	86018	34335	51684	0	0	0	Q96EI5-2;Q96EI5;A2RQR6;D6RD44;D6RCE9;D6RIH3;D6RHZ1;J3KQY4	Q96EI5-2;Q96EI5;A2RQR6;D6RD44;D6RCE9;D6RIH3;D6RHZ1;J3KQY4	Transcription elongation factor A protein-like 4	TCEAL4	8
0.91241	0.931	0.74368				1	0.3	402.11	5584300	2602300	2982000	2487500	1079800	1407700	7091000	4274800	2816200	A4UGR9-8;A4UGR9;A4UGR9-3;A4UGR9-2	A4UGR9-8;A4UGR9;A4UGR9-3;A4UGR9-2	Xin actin-binding repeat-containing protein 2	XIRP2	4
NaN	NaN	NaN				2	11.6	25.895	0	0	0	0	0	0	0	0	0	A6NFX8;Q9UKK9;A6NJU6;A6NCQ0;C9JYY9	A6NFX8;Q9UKK9;A6NJU6;A6NCQ0;C9JYY9	ADP-sugar pyrophosphatase	NUDT5	5
0.54742	NaN	NaN				1	2.5	34.006	6027000	3553100	2473900	0	0	0	0	0	0	A6NDG6	A6NDG6	Phosphoglycolate phosphatase	PGP	1
NaN	NaN	NaN				1	2.3	104.84	0	0	0	0	0	0	0	0	0	Q9H694;Q9H694-2;A6NGY7	Q9H694;Q9H694-2;A6NGY7	Protein bicaudal C homolog 1	BICC1	3
NaN	NaN	NaN				1	0.7	152.6	0	0	0	0	0	0	0	0	0	A6NHB5;Q14202;Q14202-2	A6NHB5;Q14202;Q14202-2	Zinc finger MYM-type protein 3	ZMYM3	3
NaN	NaN	NaN				1	2.2	56.068	0	0	0	0	0	0	0	0	0	P54578;P54578-3;P54578-2;A6NJA2	P54578;P54578-3;P54578-2;A6NJA2	Ubiquitin carboxyl-terminal hydrolase 14;Ubiquitin carboxyl-terminal hydrolase	USP14	4
0.82555	0.75038	0.84146				1	12.2	42.009	1224000000	606480000	617520000	344950000	164780000	180170000	1143800000	604900000	538920000	P62736;P68032;P68133;P63267;A6NL76;P63267-2;F6QUT6;F6UVQ4;C9JFL5;B8ZZJ2;F8WB63;C9JUM1	P62736;P68032;P68133;P63267;A6NL76;P63267-2;F6QUT6;F6UVQ4;C9JFL5;B8ZZJ2;F8WB63	Actin, aortic smooth muscle;Actin, alpha cardiac muscle 1;Actin, alpha skeletal muscle;Actin, gamma-enteric smooth muscle	ACTA2;ACTC1;ACTA1;ACTG2	12
1.0937	NaN	NaN				1	7.3	29.806	1466700	501930	964810	0	0	0	0	0	0	A6NMH8;E9PIF1;P60033;H0YDJ9;H0YDL9;E9PRJ8;E9PJK1;H0YEE2;E9PM31	A6NMH8;E9PIF1;P60033;H0YDJ9;H0YDL9;E9PRJ8;E9PJK1;H0YEE2;E9PM31	CD81 antigen	CD81	9
0.79351	0.80021	0.82744				8	26.3	40.411	3435400000	1682800000	1752600000	2601100000	1189400000	1411700000	3842800000	1998000000	1844900000	P07355-2;A6NMY6;P07355;H0YN42;H0YMU9;H0YMD0;H0YKS4;H0YNP5;H0YM50;H0YMM1;H0YMW4;H0YKX9;H0YMT9;H0YLV6;H0YKZ7;H0YKL9;H0YL33;H0YN28;H0YKV8;H0YNA0;H0YKN4;H0YMD9;H0YN52;H0YNB8	P07355-2;A6NMY6;P07355;H0YN42;H0YMU9;H0YMD0;H0YKS4;H0YNP5;H0YM50;H0YMM1;H0YMW4;H0YKX9;H0YMT9;H0YLV6;H0YKZ7	Putative annexin A2-like protein;Annexin A2;Annexin	ANXA2P2;ANXA2	24
0.95449	0.84999	0.81231				1	2.1	61.244	8275600	3630400	4645200	16172000	7032200	9139700	7687100	3793800	3893300	P32189;P32189-2;Q14409;P32189-4;P32189-1;A6NP46;F8WC39	P32189;P32189-2;Q14409;P32189-4;P32189-1;A6NP46;F8WC39	Glycerol kinase;Putative glycerol kinase 3	GK;GK3P	7
NaN	NaN	NaN				1	3.6	40.667	0	0	0	0	0	0	0	0	0	Q15257;A6PVN5;Q15257-2;Q15257-3;F6WIT2;Q15257-4;Q68CR8;B7ZBQ0	Q15257;A6PVN5;Q15257-2;Q15257-3;F6WIT2;Q15257-4;Q68CR8;B7ZBQ0	Serine/threonine-protein phosphatase 2A activator	PPP2R4;DKFZp781M17165	8
NaN	NaN	NaN				1	16.4	15.327	0	0	0	0	0	0	0	0	0	A6PVP4	A6PVP4		TRFP	1
0.7201	0.77467	0.89357				1	27.3	45.338	120230000	72347000	47888000	33117000	15237000	17879000	163220000	81350000	81869000	A8K7Q2	A8K7Q2		HSPA8	1
NaN	NaN	NaN				1	5.4	21.143	0	0	0	0	0	0	0	0	0	A8K878;P55145	A8K878;P55145	Mesencephalic astrocyte-derived neurotrophic factor	MANF	2
0.9849	0.99805	1.0705				1	1	83.617	1863400	830080	1033300	5081400	1995000	3086400	5020200	2253300	2766900	Q16799;Q2NKQ5;Q16799-2;Q16799-3;A8MT72	Q16799;Q2NKQ5;Q16799-2;Q16799-3;A8MT72	Reticulon-1	RTN1	5
NaN	1.0729	0.99376				1	8.2	16.956	0	0	0	91605000	34430000	57174000	50195000	22548000	27647000	A8MU27;P55854-2;A8MUA9;P55854;P61956;Q6EEV6;P61956-2	A8MU27;P55854-2;A8MUA9;P55854;P61956;Q6EEV6;P61956-2	Small ubiquitin-related modifier 3;Small ubiquitin-related modifier 2;Small ubiquitin-related modifier 4	SUMO3;SUMO2;SUMO4	7
1.3908	1.079	0.91112				4	15.5	21.916	9110200	3626500	5483700	6664400	3157500	3506900	15269000	7242400	8026700	A8MUS3;K7ERT8;K7EJV9;H7BY10;P62750;K7EMA7	A8MUS3;K7ERT8;K7EJV9;H7BY10;P62750;K7EMA7	60S ribosomal protein L23a	RPL23A	6
NaN	0.20955	NaN				2	6.7	43.727	0	0	0	2939200	1764400	1174800	0	0	0	Q9NQ29;Q9NQ29-3;Q9NQ29-2;A8MYV2;B8ZZ10;B8ZZ09	Q9NQ29;Q9NQ29-3;Q9NQ29-2;A8MYV2;B8ZZ10;B8ZZ09	Putative RNA-binding protein Luc7-like 1	LUC7L	6
NaN	NaN	NaN				2	3.6	70.901	0	0	0	0	0	0	0	0	0	B0QY89;Q9Y262;Q9Y262-2;C9K0Q7;C9JHP4;H7C3A0	B0QY89;Q9Y262;Q9Y262-2;C9K0Q7;C9JHP4;H7C3A0	Eukaryotic translation initiation factor 3 subunit L	EIF3EIP;EIF3L	6
NaN	NaN	1.4977				1	4.9	20.457	0	0	0	0	0	0	672730	297980	374750	B0QYN7;P63279;H3BQQ9;H3BPC4	B0QYN7;P63279;H3BQQ9;H3BPC4	SUMO-conjugating enzyme UBC9	UBE2I	4
NaN	NaN	NaN				2	4.3	61.626	0	0	0	0	0	0	0	0	0	B0YIW6;P48444;P48444-2	B0YIW6;P48444;P48444-2	Coatomer subunit delta	ARCN1	3
1.0804	0.85628	0.85595				2	3.8	53.778	16967000	6357800	10610000	12309000	5682600	6625900	23599000	11685000	11914000	P41219-2;P41219;P08670;B0YJC4;B0YJC5;H7C5W5;F8W835;Q5JVS8	P41219-2;P41219;P08670;B0YJC4;B0YJC5;H7C5W5;F8W835;Q5JVS8	Peripherin;Vimentin	PRPH;VIM	8
NaN	NaN	NaN				1	6.2	32.818	0	0	0	0	0	0	0	0	0	P09601;B1AHA8	P09601;B1AHA8	Heme oxygenase 1	HMOX1	2
1.4807	1.3895	1.0194				3	6.1	69.842	18459000	6349900	12109000	5493800	1748500	3745300	35639000	15988000	19651000	P12956;B1AHC9;P12956-2	P12956;B1AHC9;P12956-2	X-ray repair cross-complementing protein 6	XRCC6	3
0.85326	0.88042	0.96177				2	11.5	24.428	8577800	3847400	4730500	11437000	4674400	6762100	13179000	1546300	11633000	O75832;B1AJY7;B1AJY5;O75832-2;B1AJY6	O75832;B1AJY7;B1AJY5;O75832-2;B1AJY6	26S proteasome non-ATPase regulatory subunit 10	PSMD10	5
NaN	1.2398	NaN				1	4.7	33.781	0	0	0	879770	233710	646060	0	0	0	B1AK88;P47756;P47756-2;B1AK85;B1AK87	B1AK88;P47756;P47756-2;B1AK85;B1AK87	F-actin-capping protein subunit beta	CAPZB	5
NaN	NaN	NaN				1	0.7	139.41	0	0	0	0	0	0	0	0	0	B1AKJ5;O43847-2;O43847;G3V1R5;H0Y5G9	B1AKJ5;O43847-2;O43847;G3V1R5;H0Y5G9	Nardilysin	NRD1	5
NaN	NaN	0.94551				1	3.2	37.377	0	0	0	0	0	0	4489100	2236000	2253100	P62873;P62879;Q9HAV0;P62873-2;E7EP32;C9JXA5;C9JIS1;F6UT28;F6X3N5;C9JZN1;B1AKQ8	P62873;P62879;Q9HAV0;P62873-2;E7EP32;C9JXA5;C9JIS1;F6UT28;F6X3N5;C9JZN1;B1AKQ8	Guanine nucleotide-binding protein G(I)/G(S)/G(T) subunit beta-1;Guanine nucleotide-binding protein G(I)/G(S)/G(T) subunit beta-2;Guanine nucleotide-binding protein subunit beta-4	GNB1;GNB2;GNB4	11
3.3729	NaN	NaN				1	0.6	254.3	2188200	446350	1741900	0	0	0	0	0	0	O95477;B1AMI2	O95477;B1AMI2	ATP-binding cassette sub-family A member 1	ABCA1	2
NaN	NaN	NaN				1	4.3	32.528	0	0	0	0	0	0	0	0	0	P35030;P35030-4;P35030-2;P35030-3;P35030-5;B1AN99	P35030;P35030-4;P35030-2;P35030-3;P35030-5;B1AN99	Trypsin-3	PRSS3	6
1.0863	1.2315	0.83539				1	2.9	64.734	190360	67821	122540	456590	145790	310800	315640	170130	145510	P35610;B1APM4	P35610;B1APM4	Sterol O-acyltransferase 1	SOAT1	2
1.1934	1.4068	0.90273				2	6.4	38.449	1287100	493160	793920	820680	291230	529450	2639600	1010300	1629300	Q9UBE0;B3KNJ4;Q9UBE0-3;Q9UBE0-2;M0QX65;M0R054;M0QYM8	Q9UBE0;B3KNJ4;Q9UBE0-3;Q9UBE0-2;M0QX65;M0R054;M0QYM8	SUMO-activating enzyme subunit 1	SAE1	7
0.68834	0.64547	NaN				1	4.1	30.886	5590700	1704200	3886500	6829400	3371700	3457600	0	0	0	P61289-2;P61289-3;P61289;K9J957;K7ESG5;B3KQ25;K7ENH2;K7EKR3;K7EPX6;K7EMD0	P61289-2;P61289-3;P61289;K9J957;K7ESG5;B3KQ25;K7ENH2;K7EKR3;K7EPX6;K7EMD0	Proteasome activator complex subunit 3	PSME3	10
1.3066	0.92922	1.0705				4	9.3	65.308	678510	251260	427250	16752000	6729000	10023000	46277000	20880000	25397000	P30153;B3KQV6;E9PH38;C9J9C1	P30153;B3KQV6;E9PH38	Serine/threonine-protein phosphatase 2A 65 kDa regulatory subunit A alpha isoform	PPP2R1A	4
NaN	NaN	NaN				1	3.4	44.408	0	0	0	0	0	0	0	0	0	P49354;P49354-2;B3KVN2	P49354;P49354-2;B3KVN2	Protein farnesyltransferase/geranylgeranyltransferase type-1 subunit alpha	FNTA	3
NaN	NaN	NaN				1	3.5	42.674	0	0	0	0	0	0	0	0	0	P35659;B4DFG0;P35659-2;D6R9L5;D6RDA2	P35659;B4DFG0;P35659-2;D6R9L5;D6RDA2	Protein DEK	DEK	5
1.3362	1.0873	1.0618				1	9.6	36.735	478050000	199230000	278830000	637160000	242970000	394180000	483870000	217990000	265880000	P52895;Q04828;B4DK69;S4R3P0;P52895-2	P52895;Q04828;B4DK69;S4R3P0;P52895-2	Aldo-keto reductase family 1 member C2;Aldo-keto reductase family 1 member C1	AKR1C2;AKR1C1	5
2.4005	1.8715	1.918				1	2.7	48.099	9031600	2627600	6404000	5221500	1447200	3774400	724150	226510	497640	B4DLN1;P52815	B4DLN1;P52815	39S ribosomal protein L12, mitochondrial	SLC25A10;MRPL12	2
1.2089	1.2008	1.0991				5	18.6	30.867	1386000000	497070000	888940000	1586200000	556000000	1030200000	481150000	201890000	279250000	P15559;H3BNV2;P15559-2;P15559-3;B4DLR8;H3BRK3	P15559;H3BNV2;P15559-2;P15559-3;B4DLR8;H3BRK3	NAD(P)H dehydrogenase [quinone] 1	NQO1	6
NaN	NaN	NaN				1	5.2	28.612	0	0	0	0	0	0	0	0	0	O95249;E9PCW1;K7EJC8;B4DQA8;F6RU00	O95249;E9PCW1;K7EJC8;B4DQA8;F6RU00	Golgi SNAP receptor complex member 1	GOSR1	5
0.74437	1.1546	0.7797				2	10.6	24.488	35471000	17202000	18268000	67517000	31822000	35694000	54005000	27233000	26772000	Q15907;P62491;H3BSC1;Q15907-2;H3BMH2;P62491-2;B4DQU5	Q15907;P62491;H3BSC1;Q15907-2;H3BMH2;P62491-2;B4DQU5	Ras-related protein Rab-11B;Ras-related protein Rab-11A	RAB11B;RAB11A	7
NaN	NaN	NaN				1	3.8	42.668	0	0	0	0	0	0	0	0	0	B5MDU6;Q9H6V9-2;Q9H6V9;B4DRG3;B5MCE2	B5MDU6;Q9H6V9-2;Q9H6V9;B4DRG3;B5MCE2	UPF0554 protein C2orf43	C2orf43	5
0.93918	0.77665	0.91275				1	21	77.038	5547800	2193300	3354400	8258800	3840000	4418800	13311000	6185700	7125300	P0CG48;Q96C32;P0CG47;Q5PY61;J3QKN0;F5GXK7;F5H747;P62979;F5H388;B4DV12;F5H265;F5H2Z3;F5GYU3;P62987;F5H6Q2;J3QTR3;J3QS39;M0R1V7;F5GZ39;J3QSA3	P0CG48;Q96C32;P0CG47;Q5PY61;J3QKN0;F5GXK7;F5H747;P62979;F5H388;B4DV12;F5H265;F5H2Z3;F5GYU3;P62987;F5H6Q2;J3QTR3;J3QS39;M0R1V7;F5GZ39;J3QSA3	Polyubiquitin-C;Ubiquitin;Polyubiquitin-B;Ubiquitin;Ubiquitin-40S ribosomal protein S27a;Ubiquitin;40S ribosomal protein S27a;Ubiquitin-60S ribosomal protein L40;Ubiquitin;60S ribosomal protein L40	UBC;UBB;RPS27A;UBA52	20
NaN	1.272	NaN				1	4.6	21.778	0	0	0	1536800	525150	1011600	0	0	0	F8VYN9;P40616;P40616-2;B4DZG7	F8VYN9;P40616;P40616-2;B4DZG7	ADP-ribosylation factor-like protein 1	ARL1	4
NaN	NaN	0.94519				1	1.6	110.18	0	0	0	0	0	0	732050	344780	387280	B5MBZ0;Q9HC35;Q9HC35-2	B5MBZ0;Q9HC35;Q9HC35-2	Echinoderm microtubule-associated protein-like 4	EML4	3
NaN	NaN	NaN				1	5.3	21.391	0	0	0	0	0	0	0	0	0	B5MC07;O95994;C9J3E2;H7C3Z9	B5MC07;O95994;C9J3E2;H7C3Z9	Anterior gradient protein 2 homolog	AGR2	4
1.159	0.97125	0.97026				2	4.3	48.162	12970000	5171800	7798400	13361000	5386900	7973900	18401000	9348800	9052300	Q9Y6E2;E7ETZ4;B5MCH7;B5MCE7;Q7L1Q6-3;Q7L1Q6-4;Q7L1Q6;Q7L1Q6-2;E9PFD4	Q9Y6E2;E7ETZ4;B5MCH7;B5MCE7;Q7L1Q6-3;Q7L1Q6-4;Q7L1Q6;Q7L1Q6-2;E9PFD4	Basic leucine zipper and W2 domain-containing protein 2;Basic leucine zipper and W2 domain-containing protein 1	BZW2;BZW1	9
1.0911	1.0922	1.1019				3	7.9	46.108	35988000	14542000	21446000	55542000	20661000	34881000	67823000	30233000	37591000	P39023;G5E9G0;B5MCW2;H7C422;H7C3M2;F8WCR1	P39023;G5E9G0;B5MCW2	60S ribosomal protein L3	RPL3	6
1.0268	1.1707	1.0438				2	6.6	45.46	23064000	9939100	13125000	28664000	11201000	17463000	33091000	14751000	18340000	Q15019-2;Q15019-3;Q15019;B5MCX3;H7C2Y0;C9J2Q4;H7C310	Q15019-2;Q15019-3;Q15019;B5MCX3;H7C2Y0;C9J2Q4;H7C310	Septin-2	2017-09-02	7
2.2366	1.3014	1.5945				2	4.6	51.294	1864000	481910	1382100	45830000	14888000	30942000	22409000	7982600	14426000	P55084;F5GZQ3;P55084-2;B5MD38	P55084;F5GZQ3;P55084-2;B5MD38	Trifunctional enzyme subunit beta, mitochondrial;3-ketoacyl-CoA thiolase	HADHB	4
1.4731	1.0849	1.3333				5	18.9	26.224	167670000	61695000	105980000	447680000	167570000	280120000	341520000	131390000	210130000	B5MDF5;P62826;J3KQE5;F5H018;B4DV51;H0YFC6	B5MDF5;P62826;J3KQE5;F5H018	GTP-binding nuclear protein Ran	RAN	6
NaN	NaN	NaN				1	4.3	33.969	0	0	0	0	0	0	0	0	0	P23193;P23193-2;B7Z4S1	P23193;P23193-2;B7Z4S1	Transcription elongation factor A protein 1	TCEA1	3
NaN	NaN	NaN				1	1.6	89.834	0	0	0	0	0	0	0	0	0	Q96GQ7;B7Z6D5	Q96GQ7;B7Z6D5	Probable ATP-dependent RNA helicase DDX27	DDX27	2
NaN	NaN	NaN				1	1.3	69.019	0	0	0	0	0	0	1025900	1025900	0	B7Z7U4;R4GNH5	B7Z7U4;R4GNH5	Tyrosine-protein kinase receptor	NTRK3	2
0.90036	NaN	2.2115				1	7	32.806	1586700	605980	980690	0	0	0	993510	441050	552470	P40855;Q5QNY5;B7Z8B3;E9PS71	P40855;Q5QNY5;B7Z8B3;E9PS71	Peroxisomal biogenesis factor 19	PEX19	4
1.8049	1.0512	1.7152				2	5.2	56.806	5024300	1376600	3647700	6893200	2091500	4801700	7720700	2617900	5102900	P30419;B7Z8J4;P30419-2;K7EN42;K7EN82	P30419;B7Z8J4;P30419-2;K7EN42;K7EN82	Glycylpeptide N-tetradecanoyltransferase 1	NMT1	5
NaN	0.76891	NaN				3	10.2	45.374	0	0	0	4233400	1818200	2415100	0	0	0	P55209;H0YIV4;F5H4R6;F8W0J6;P55209-2;B7Z9C2;F8W543;F8VV59;P55209-3;F8VY35;F8VUX1;F8VXI6;F8W118;F8W020;H0YHC3;H0YH88;F8VVB5;F8VRJ2	P55209;H0YIV4;F5H4R6;F8W0J6;P55209-2;B7Z9C2;F8W543;F8VV59;P55209-3;F8VY35;F8VUX1;F8VXI6;F8W118;F8W020;H0YHC3;H0YH88	Nucleosome assembly protein 1-like 1	NAP1L1	18
NaN	NaN	NaN				1	2.6	59.67	0	0	0	0	0	0	0	0	0	P48643;E9PCA1;B7ZAR1;E7ENZ3;P48643-2	P48643;E9PCA1;B7ZAR1;E7ENZ3;P48643-2	T-complex protein 1 subunit epsilon	CCT5	5
NaN	1.1685	1.3524				1	11	16.645	0	0	0	3254200	1176800	2077500	3615700	1459700	2156000	B8ZZN6;P63165;B9A032;B8ZZJ0	B8ZZN6;P63165;B9A032;B8ZZJ0	Small ubiquitin-related modifier 1	SUMO1	4
NaN	NaN	NaN				1	1.8	48.713	0	0	0	0	0	0	0	0	0	Q12765-2;Q12765;C9K052;C9J7U9;B8ZZP4	Q12765-2;Q12765;C9K052;C9J7U9;B8ZZP4	Secernin-1	SCRN1	5
1.1592	1.0693	1.0644				1	12.6	12.203	4015600	1432100	2583500	3497800	1435100	2062700	2903300	1190800	1712600	P06454;P06454-2;B8ZZQ6	P06454;P06454-2;B8ZZQ6	Prothymosin alpha;Thymosin alpha-1	PTMA	3
NaN	NaN	NaN				1	3.1	43.482	0	0	0	0	0	0	0	0	0	Q6NVY1;B9A058;H7C126	Q6NVY1;B9A058;H7C126	3-hydroxyisobutyryl-CoA hydrolase, mitochondrial	HIBCH	3
1.8147	NaN	NaN				1	3.8	58.92	100640	31194	69449	0	0	0	0	0	0	Q92925;Q92925-2;B9EGA3;Q92925-3;J3KMX2	Q92925;Q92925-2;B9EGA3;Q92925-3;J3KMX2	SWI/SNF-related matrix-associated actin-dependent regulator of chromatin subfamily D member 2	SMARCD2	5
NaN	0.89691	0.6519			+	1	1.7	47.082	0	0	0	92894	42546	50348	33200	19777	13424	CON__A3EZ82;Q6E0U4;Q6E0U4-2;Q6E0U4-16;CON__A3EZ79;Q6E0U4-4;C9IYI1;C9JCN1;H7BZ95;M0R0A5;Q6E0U4-8;M0R265;C9J186;Q6E0U4-9;Q6E0U4-10;S4R3L7;Q6E0U4-12;Q6E0U4-14;Q6E0U4-11;Q6E0U4-13;S4R2X7;Q6E0U4-15;M0R1M0	CON__A3EZ82;Q6E0U4;Q6E0U4-2;Q6E0U4-16;CON__A3EZ79;Q6E0U4-4;C9IYI1;C9JCN1;H7BZ95;M0R0A5;Q6E0U4-8;M0R265;C9J186;Q6E0U4-9;Q6E0U4-10;S4R3L7;Q6E0U4-12;Q6E0U4-14;Q6E0U4-11;Q6E0U4-13;S4R2X7;Q6E0U4-15;M0R1M0	Dermokine	DMKN	23
NaN	NaN	NaN				1	9.8	13.282	0	0	0	0	0	0	0	0	0	C9IYP1	C9IYP1		DLG1	1
1.5473	1.5462	2.0413				1	2.7	33.887	4481300	1431900	3049400	15904000	4766500	11138000	9142300	3386000	5756300	C9IZQ1;E9PAL7;P43307;C9J5W0;C9J3L8;P43307-2	C9IZQ1;E9PAL7;P43307;C9J5W0;C9J3L8;P43307-2	Translocon-associated protein subunit alpha	SSR1	6
0.95697	0.91219	0.85609				1	5.3	23.489	5925900	2725300	3200500	15375000	6926700	8448000	10300000	5025000	5275100	P51149;C9J8S3;C9J592;C9J4V0;C9IZZ0;C9J4S4;C9J7D1	P51149;C9J8S3;C9J592;C9J4V0;C9IZZ0;C9J4S4;C9J7D1	Ras-related protein Rab-7a	RAB7A	7
NaN	NaN	NaN				1	5.2	23.491	0	0	0	0	0	0	0	0	0	Q9H0T7;H7C1P7;C9J0T6	Q9H0T7;H7C1P7;C9J0T6	Ras-related protein Rab-17	RAB17	3
NaN	NaN	0.83777				1	1.5	65.746	0	0	0	0	0	0	6295700	2658700	3637000	Q93052;C9JUT4;C9J4E3;C9J5C8;C9J1K7;C9J3U9;C9JT42;C9JIY7;C9J2R5;C9JE51	Q93052;C9JUT4;C9J4E3;C9J5C8;C9J1K7;C9J3U9;C9JT42;C9JIY7;C9J2R5;C9JE51	Lipoma-preferred partner	LPP	10
NaN	1.4861	1.4483				2	12.6	19.81	0	0	0	898680	285540	613130	2191500	897100	1294400	O43324;C9J1V9;D6RBD7;O43324-2;H0YAL7;D6RCQ0	O43324;C9J1V9;D6RBD7;O43324-2;H0YAL7;D6RCQ0	Eukaryotic translation elongation factor 1 epsilon-1	EEF1E1	6
NaN	NaN	NaN				1	0.8	176.23	0	0	0	0	0	0	0	0	0	Q04637-9;Q04637-8;Q04637;E7EUU4;Q04637-3;E9PGM1;Q04637-4;E7EX73;Q04637-5;Q04637-7;Q04637-6;C9JF13;C9K073;C9J2Z7;C9J6B6	Q04637-9;Q04637-8;Q04637;E7EUU4;Q04637-3;E9PGM1;Q04637-4;E7EX73;Q04637-5;Q04637-7;Q04637-6;C9JF13;C9K073;C9J2Z7;C9J6B6	Eukaryotic translation initiation factor 4 gamma 1	EIF4G1	15
1.0276	0.90854	1.0741				2	13.4	20.503	1829200	761950	1067200	1515400	390150	1125200	9641800	4273200	5368700	I3L504;P63241-2;P63241;Q6IS14;Q9GZV4;I3L397;C9J4W5;C9J7B5;F8WCJ1	I3L504;P63241-2;P63241;Q6IS14;Q9GZV4;I3L397;C9J4W5;C9J7B5;F8WCJ1	Eukaryotic translation initiation factor 5A-1;Eukaryotic translation initiation factor 5A-1-like;Eukaryotic translation initiation factor 5A-2	EIF5A;EIF5AL1;EIF5A2	9
NaN	NaN	NaN				1	6.1	25.966	0	0	0	0	0	0	0	0	0	P11234-2;P11234-3;P11234;C9J6B1	P11234-2;P11234-3;P11234;C9J6B1	Ras-related protein Ral-B	RALB	4
NaN	2.0375	0.94507				2	7.5	44.078	0	0	0	513670	118470	395200	3248700	1285900	1962800	Q99733-2;Q99733;C9JZI7;C9J6D1;E9PKT8;H0YCI4;A8MXH2;E9PP22;E9PNJ7;E9PS34;E9PJJ2;E9PNW0;C9J1B1;E9PKI2	Q99733-2;Q99733;C9JZI7;C9J6D1;E9PKT8;H0YCI4;A8MXH2;E9PP22;E9PNJ7;E9PS34;E9PJJ2;E9PNW0;C9J1B1;E9PKI2	Nucleosome assembly protein 1-like 4	NAP1L4	14
0.059388	NaN	NaN				1	4.4	39.681	3927500	3682900	244630	0	0	0	0	0	0	P35249;C9JZI1;P35249-2;C9J8M3;C9JTT7;C9JXZ7;F8WE44;C9JGY5;C9JW34	P35249;C9JZI1;P35249-2;C9J8M3;C9JTT7;C9JXZ7;F8WE44;C9JGY5;C9JW34	Replication factor C subunit 4	RFC4	9
0.81735	0.50139	0.58266				1	2.8	36.014	25287000	13616000	11670000	5545600	3003600	2541900	6846500	4154600	2691900	Q14847-2;Q14847;Q14847-3;C9J9W2	Q14847-2;Q14847;Q14847-3;C9J9W2	LIM and SH3 domain protein 1	LASP1	4
NaN	NaN	NaN				1	10.5	14.968	0	0	0	0	0	0	0	0	0	C9JA36	C9JA36		ATP1B3	1
1.5864	NaN	NaN				1	8.3	20.511	1709000	458080	1250900	0	0	0	0	0	0	P18085;C9JAK5;U3KQF2	P18085;C9JAK5;U3KQF2	ADP-ribosylation factor 4	ARF4	3
NaN	NaN	1.3996	+			1	4.7	23.205	0	0	0	0	0	0	278530	94326	184210	C9JCC6;Q14919-2;Q14919;E9PNC7	C9JCC6;Q14919-2;Q14919;E9PNC7	Dr1-associated corepressor	DRAP1	4
NaN	NaN	NaN				1	4	31.904	0	0	0	0	0	0	0	0	0	F6WQW2;P43487;P43487-2;C9JDM3;C9JJ34	F6WQW2;P43487;P43487-2;C9JDM3;C9JJ34	Ran-specific GTPase-activating protein	RANBP1	5
0.90576	0.97203	0.84406				1	3.8	29.455	14758000	6449400	8308600	23955000	9232600	14722000	24591000	12126000	12465000	P22090;P62701;Q8TD47;C9JEH7	P22090;P62701;Q8TD47;C9JEH7	40S ribosomal protein S4, Y isoform 1;40S ribosomal protein S4, X isoform;40S ribosomal protein S4, Y isoform 2	RPS4Y1;RPS4X;RPS4Y2	4
0.60202	0.76366	0.78308				1	3	61.594	1699700	622990	1076800	1263500	591400	672060	1846400	1017700	828680	O95817;C9JFK9	O95817;C9JFK9	BAG family molecular chaperone regulator 3	BAG3	2
NaN	NaN	NaN				2	5.7	58.44	2494300	2494300	0	0	0	0	0	0	0	C9JIZ6;P07602-3;P07602-2;P07602;Q5BJH1;A0A0J9YXB8	C9JIZ6;P07602-3;P07602-2;P07602;Q5BJH1;A0A0J9YXB8	Proactivator polypeptide;Saposin-A;Saposin-B-Val;Saposin-B;Saposin-C;Saposin-D	PSAP	6
1.2159	1.0428	NaN				1	2.5	43.447	22401000	8608600	13793000	34098000	14046000	20052000	0	0	0	Q92734;Q92734-2;Q92734-3;Q92734-4;C9JJP5;C9JUE0;C9JTY3	Q92734;Q92734-2;Q92734-3;Q92734-4;C9JJP5;C9JUE0;C9JTY3	Protein TFG	TFG	7
NaN	0.92053	0.90118				1	5.3	24.68	0	0	0	3135200	1213700	1921500	915150	403670	511470	Q92520;C9JMN4;C9JP35	Q92520;C9JMN4;C9JP35	Protein FAM3C	FAM3C	3
NaN	NaN	1.0917				1	4.1	30.223	0	0	0	0	0	0	19464000	8273400	11191000	U3KQV3;U3KQA9;Q5JR05;P08134;P61586;Q5JR08;C9JX21;E9PQH6;C9JNR4;E9PN11;Q5JR07;Q5JR06;C9JRM1;E9PLA2	U3KQV3;U3KQA9;Q5JR05;P08134;P61586;Q5JR08;C9JX21;E9PQH6;C9JNR4;E9PN11;Q5JR07;Q5JR06;C9JRM1;E9PLA2	Rho-related GTP-binding protein RhoC;Transforming protein RhoA	RHOC;RHOA	14
1.157	0.64265	1.0222				1	5.1	17.779	22206000	9585700	12621000	12053000	4819600	7233100	5960100	2805400	3154700	P83731;C9JNW5;C9JXB8	P83731;C9JNW5;C9JXB8	60S ribosomal protein L24	RPL24	3
NaN	NaN	NaN				1	11.3	22.083	0	0	0	0	0	0	0	0	0	Q9BRJ6;C9JQV0	Q9BRJ6;C9JQV0	Uncharacterized protein C7orf50	C7orf50	2
NaN	NaN	NaN				1	3.5	50.127	0	0	0	0	0	0	0	0	0	Q96Q11;Q96Q11-2;F8W8C3;C9JRS7;Q96Q11-3	Q96Q11;Q96Q11-2;F8W8C3;C9JRS7;Q96Q11-3	CCA tRNA nucleotidyltransferase 1, mitochondrial	TRNT1	5
NaN	NaN	NaN	+			1	16.5	9.6541	0	0	0	0	0	0	0	0	0	C9JTA8	C9JTA8		C2orf76	1
NaN	NaN	NaN				1	2.3	59.594	0	0	0	0	0	0	0	0	0	Q14554;Q14554-2;C9JY10	Q14554;Q14554-2;C9JY10	Protein disulfide-isomerase A5	PDIA5	3
0.56685	0.64584	0.61333				2	2.1	144.37	8135700	4781700	3354000	9750300	4718800	5031500	6875100	4072800	2802300	Q92823-5;Q92823;F8W775;Q92823-2;C9JYY6;Q92823-6;Q92823-4;Q92823-3;A0A087X2B3	Q92823-5;Q92823;F8W775;Q92823-2;C9JYY6;Q92823-6;Q92823-4;Q92823-3;A0A087X2B3	Neuronal cell adhesion molecule	NRCAM	9
0.97369	0.90156	NaN				1	2.1	108.17	439510	208610	230900	1088400	455960	632430	0	0	0	O60716;O60716-2;O60716-3;C9JZR2;O60716-5;O60716-9;O60716-10;O60716-11;O60716-13;O60716-17;O60716-18;O60716-19;O60716-21;O60716-25;O60716-26;O60716-27;O60716-29;H0YC95	O60716;O60716-2;O60716-3;C9JZR2;O60716-5;O60716-9;O60716-10;O60716-11;O60716-13;O60716-17;O60716-18;O60716-19;O60716-21;O60716-25;O60716-26;O60716-27;O60716-29;H0YC95	Catenin delta-1	CTNND1	18
NaN	NaN	NaN			+	1	2.8	77.456	0	0	0	0	0	0	1675100	1675100	0	CON__ENSEMBL:ENSBTAP00000016046	CON__ENSEMBL:ENSBTAP00000016046			1
0.96265	0.93527	0.88023			+	3	9.2	57.73	505880000	218790000	287090000	567120000	241150000	325980000	532320000	263300000	269010000	F5H5D3;CON__ENSEMBL:ENSBTAP00000016242;P68363;Q71U36;Q13748;Q6PEY2;Q9BQE3;Q13748-2;Q71U36-2;P68363-2;C9J2C0;Q9NY65;P68366;P68366-2;Q9NY65-2;V9GZ17;F8VVB9;F8W0F6;F8VQQ4;F8VS66;F8VRZ4;F8VWV9;F8VX09;F8VRK0;F8VXZ7	F5H5D3;CON__ENSEMBL:ENSBTAP00000016242;P68363;Q71U36;Q13748;Q6PEY2;Q9BQE3;Q13748-2;Q71U36-2;P68363-2	Tubulin alpha-1B chain;Tubulin alpha-1A chain;Tubulin alpha-3C/D chain;Tubulin alpha-3E chain;Tubulin alpha-1C chain	TUBA1C;TUBA1B;TUBA1A;TUBA3C;TUBA3E	25
NaN	NaN	NaN			+	1	3.8	53.661	0	0	0	1351900	1351900	0	0	0	0	CON__ENSEMBL:ENSBTAP00000018229;CON__Q3MHN5	CON__ENSEMBL:ENSBTAP00000018229;CON__Q3MHN5			2
0.084248	NaN	4.5074			+	5	4.7	164.34	12822000	12075000	747190	0	0	0	5967200	3218600	2748600	CON__ENSEMBL:ENSBTAP00000024146;P20742;P01023;P20742-2	CON__ENSEMBL:ENSBTAP00000024146			4
0.01444	NaN	NaN			+	1	8.7	24.409	21519000	21369000	150040	1978300	1978300	0	0	0	0	CON__P00761	CON__P00761			1
0.6327	0.6448	0.68481			+	1	4.4	60.044	761710000	409260000	352450000	1063600000	551630000	511990000	1059300000	596520000	462790000	CON__P02538;CON__P04259;CON__P48668;P02538;P04259;P48668;CON__P50446	CON__P02538;CON__P04259;CON__P48668;P02538;P04259;P48668;CON__P50446	Keratin, type II cytoskeletal 6A;Keratin, type II cytoskeletal 6B;Keratin, type II cytoskeletal 6C	KRT6A;KRT6B;KRT6C	7
0.02095	NaN	NaN			+	6	18.1	69.366	44919000	44494000	424290	0	0	0	0	0	0	CON__P02768-1;P02768;A0A0C4DGB6;B7WNR0;D6RHD5;H0YA55;C9JKR2;P02768-2;A0A087WWT3;P02768-3;H7C013	CON__P02768-1;P02768;A0A0C4DGB6;B7WNR0;D6RHD5;H0YA55;C9JKR2;P02768-2;A0A087WWT3;P02768-3	Serum albumin	ALB	11
0.10751	0.042987	0.13684			+	25	44.3	69.293	1117300000	1104300000	12923000	349300000	346540000	2752600	1277700000	1254100000	23534000	CON__P02769	CON__P02769			1
0.63218	0.60654	0.67166			+	3	20.5	56.608	6261000000	3304000000	2956900000	2789300000	1489100000	1300200000	5513500000	3123800000	2389700000	P05787-2;CON__P05787;P05787;F8W1U3;F8VP67;CON__Q9H552;CON__H-INV:HIT000292931;CON__Q5XQN5;CON__P13647;P13647;CON__Q922U2;CON__Q6IFZ6;F8W0C6;CON__H-INV:HIT000016045;H0YIB2;CON__Q3TTY5;CON__Q01546;Q01546;CON__P12035;P12035;CON__Q6ISB0;CON__Q9NSB2;Q9NSB2;CON__P19013;CON__Q7Z794;Q7Z794;CON__O95678;CON__Q8BGZ7;O95678;F8W1S1;CON__Q32MB2;Q86Y46;P19013;CON__Q7RTS7;Q7RTS7;CON__P07744;CON__Q9R0H5;CON__Q3SY…	P05787-2;CON__P05787;P05787;F8W1U3;F8VP67	Keratin, type II cytoskeletal 8	KRT8	47
0.94729	0.81011	0.88483			+	2	7.2	51.417	559340000	251820000	307520000	619300000	284020000	335280000	600660000	305680000	294980000	CON__P08729;CON__Q3KNV1;P08729;CON__Q9DCV7	CON__P08729;CON__Q3KNV1;P08729;CON__Q9DCV7	Keratin, type II cytoskeletal 7	KRT7	4
0.15909	NaN	NaN			+	1	4.1	47.754	158750	129250	29497	0	0	0	0	0	0	CON__P08730-1	CON__P08730-1			1
0.087024	NaN	0.11805			+	4	15.6	38.418	69248000	65386000	3862300	1177300	1177300	0	29838000	23153000	6685300	CON__P12763;P02765	CON__P12763			2
0.046593	NaN	NaN			+	3	7.4	59.51	18069000	17890000	179070	4444400	4444400	0	0	0	0	CON__P13645;P13645;CON__Q7Z3Y7;Q7Z3Y7	CON__P13645;P13645	Keratin, type I cytoskeletal 10	KRT10	4
0.37905	NaN	NaN			+	1	4.5	30.276	1955400	1511100	444290	0	0	0	0	0	0	CON__P15497	CON__P15497			1
NaN	0.66155	NaN			+	1	2.6	54.71	0	0	0	960930	761710	199220	0	0	0	CON__P28800	CON__P28800			1
0.0090112	0.0077127	0.034507			+	4	10.1	46.103	81158000	79863000	1294900	89162000	88475000	687130	216660000	213230000	3437800	CON__P34955	CON__P34955			1
0.019985	0.11802	0.031213			+	4	13	62.129	4177800	4051500	126280	19214000	18330000	884200	1850500	1780000	70493	CON__P35527;P35527;K7EQQ3	CON__P35527;P35527;K7EQQ3	Keratin, type I cytoskeletal 9	KRT9	3
0.80079	0.70462	0.81596			+	1	24.3	41.736	2144800000	1033500000	1111400000	2003400000	955570000	1047900000	2185500000	1129300000	1056300000	CON__P60712;P60709;Q6S8J3;Q562R1;E7EVS6;G5E9R0;C9JZR7;C9JTX5;A5A3E0;P0CG38;P0CG39;Q9BYX7	CON__P60712;P60709	Actin, cytoplasmic 1;Actin, cytoplasmic 1, N-terminally processed	ACTB	12
0.72861	0.46349	0.61107			+	1	19.4	6.1414	310900	159650	151250	208660	127360	81297	781990	487070	294920	P13640;CON__P67983;P02795;P04732;P13640-2;P80297;Q8N339	P13640;CON__P67983;P02795;P04732;P13640-2;P80297;Q8N339	Metallothionein-1G;Metallothionein-2;Metallothionein-1E;Metallothionein-1X;Metallothionein-1M	MT1G;MT2A;MT1E;MT1X;MT1M	7
1.098	1.1487	1.164			+	2	3.7	55.802	120990000	45828000	75160000	164050000	59555000	104500000	93035000	38188000	54847000	CON__P78386;P78386;CON__Q14533;Q14533;CON__P78385;CON__Q6NT21;P78385;CON__O43790;O43790;A0A087X106;CON__Q61726;F5GYI5;A6NCN2;CON__Q9NSB4;Q9NSB4	CON__P78386;P78386;CON__Q14533;Q14533;CON__P78385;CON__Q6NT21;P78385;CON__O43790;O43790;A0A087X106;CON__Q61726;F5GYI5;A6NCN2;CON__Q9NSB4;Q9NSB4	Keratin, type II cuticular Hb5;Keratin, type II cuticular Hb1;Keratin, type II cuticular Hb3;Keratin, type II cuticular Hb6;Keratin-81-like protein;Keratin, type II cuticular Hb2	KRT85;KRT81;KRT83;KRT86;KRT82	15
0.043467	0.066702	0.048238			+	10	20.5	77.738	57689000	56976000	712750	21115000	20598000	517420	32768000	32057000	711190	CON__Q0IIK2;CON__Q29443	CON__Q0IIK2;CON__Q29443			2
NaN	NaN	NaN			+	1	6.9	22.144	0	0	0	0	0	0	0	0	0	CON__Q2KIS7;P05452;E9PHK0	CON__Q2KIS7;P05452;E9PHK0	Tetranectin	CLEC3B	3
NaN	0.81007	NaN			+	1	1.4	85.411	0	0	0	1644300	597630	1046700	0	0	0	CON__Q3KUS7	CON__Q3KUS7			1
NaN	NaN	NaN			+	1	2.1	68.587	0	0	0	3219500	3219500	0	0	0	0	CON__Q3SZ57	CON__Q3SZ57			1
NaN	NaN	NaN			+	1	7.4	23.182	17469000	17469000	0	0	0	0	0	0	0	CON__Q3SZR3	CON__Q3SZR3			1
NaN	NaN	NaN			+	1	2.1	42.663	0	0	0	0	0	0	0	0	0	CON__Q58D62	CON__Q58D62			1
0.70571	0.68914	0.82521			+	1	4.9	57.809	3071400	1716300	1355200	7727600	3551000	4176600	8778900	4417200	4361700	CON__Q5XKE5;Q5XKE5;CON__Q8VED5	CON__Q5XKE5;Q5XKE5;CON__Q8VED5	Keratin, type II cytoskeletal 79	KRT79	3
0.6541	0.66364	0.68084			+	1	4.8	58.911	601220000	320990000	280220000	638920000	330390000	308520000	663160000	382720000	280440000	CON__Q6NXH9	CON__Q6NXH9			1
NaN	0.80837	1.1163				1	1	102.33	0	0	0	7360200	3107700	4252500	6132000	3188800	2943200	D3DQV9;P78344;H0Y3P2;P78344-2;E9PKF8	D3DQV9;P78344;H0Y3P2;P78344-2;E9PKF8	Eukaryotic translation initiation factor 4 gamma 2	EIF4G2	5
NaN	NaN	NaN				1	1.8	45.801	0	0	0	0	0	0	0	0	0	Q86WR7;Q86WR7-2;D3DRR9	Q86WR7;Q86WR7-2;D3DRR9	Uncharacterized protein C10orf47	C10orf47	3
1.1183	1.0073	1.0574				5	36.6	17.962	8231300	3424000	4807200	20996000	8480200	12516000	16199000	7933900	8265400	F8W727;P62910;D3YTB1;D3YTI8	F8W727;P62910;D3YTB1	60S ribosomal protein L32	RPL32	4
NaN	0.92693	1.098				2	6.6	60.004	0	0	0	4185500	1636800	2548800	2006200	901290	1104900	E9PF82;Q13557-11;Q13557-4;Q13557-6;E9PBG7;Q13557-3;Q13557;D6R938;Q13557-5;Q13557-10;Q13557-9;Q13557-12;Q13557-8;Q13554;Q13555-6;A0A0A0MT11;Q13555;Q13555-8;Q13555-2;Q13554-2;Q13555-9;A0A0A0MS52;Q13555-7;Q13555-4;Q13555-5;Q13555-3;Q13554-5;Q13554-8;Q5SWX3;Q13554-3;Q13555-10;Q13554-6;Q9UQM7-2;Q13554-4;Q9UQM7;Q8WU40;Q13554-7;H7BXS4;H0Y6G2;H0Y9C2;H0Y9J2	E9PF82;Q13557-11;Q13557-4;Q13557-6;E9PBG7;Q13557-3;Q13557;D6R938;Q13557-5;Q13557-10;Q13557-9;Q13557-12;Q13557-8;Q13554;Q13555-6;A0A0A0MT11;Q13555;Q13555-8;Q13555-2;Q13554-2;Q13555-9;A0A0A0MS52;Q13555-7;Q13555-4;Q13555-5;Q13555-3;Q13554-5;Q13554-8;Q5SWX3;Q13554-3;Q13555-10;Q13554-6;Q9UQM7-2;Q13554-4;Q9UQM7;Q8WU40;Q13554-7;H7BXS4;H0Y6G2;H0Y9C2;H0Y9J2	Calcium/calmodulin-dependent protein kinase type II subunit delta;Calcium/calmodulin-dependent protein kinase type II subunit beta;Calcium/calmodulin-dependent protein kinase type II subunit gamma;Calcium/calmodulin-dependent protein kinase type II subunit alpha	CAMK2D;CAMK2B;CAMK2G;CAMK2A	41
1.0603	1.0337	1.037				6	28.6	26.839	400900000	154830000	246070000	597730000	213880000	383850000	260040000	114070000	145970000	D6R956;P09936;D6RE83;D6R974;D6RF53	D6R956;P09936;D6RE83;D6R974	Ubiquitin carboxyl-terminal hydrolase isozyme L1	UCHL1	5
0.57255	0.61171	0.54591				2	11.2	15.394	2216600	1214100	1002500	5959000	3026600	2932400	4676800	2820800	1855900	Q6PUV4;D6R960;D6RGY3;D6RBA5;D6RI05;D6RDN3	Q6PUV4;D6R960;D6RGY3;D6RBA5;D6RI05;D6RDN3	Complexin-2	CPLX2	6
3.8672	1.5912	1.2353				2	12.9	24.033	1655500	228610	1426900	3928700	1199000	2729800	1300600	521680	778930	P26583;D6R9A6	P26583;D6R9A6	High mobility group protein B2	HMGB2	2
1.0127	NaN	NaN				2	3	51.229	135000000	57198000	77807000	0	0	0	0	0	0	G8JLB6;P31943;E9PCY7;D6RBM0;D6RIH9;D6RJ04;D6RDU3;D6RIU0;E7EN40;D6RIT2;D6RFM3;D6R9T0;E5RGV0;D6RAM1;E7EQJ0;D6RDL0;D6RF17;D6R9D3;E5RJ94	G8JLB6;P31943;E9PCY7;D6RBM0;D6RIH9;D6RJ04;D6RDU3;D6RIU0;E7EN40;D6RIT2;D6RFM3;D6R9T0;E5RGV0;D6RAM1;E7EQJ0;D6RDL0;D6RF17;D6R9D3;E5RJ94	Heterogeneous nuclear ribonucleoprotein H;Heterogeneous nuclear ribonucleoprotein H, N-terminally processed	HNRNPH1	19
NaN	0.6854	NaN				1	4.1	26.724	0	0	0	5486900	2627800	2859000	0	0	0	Q9BUT1;Q9BUT1-2;D6RIR6;D6R9U8;D6RFG2;D6RBF6	Q9BUT1;Q9BUT1-2;D6RIR6;D6R9U8;D6RFG2;D6RBF6	3-hydroxybutyrate dehydrogenase type 2	BDH2	6
NaN	NaN	3.3419				1	6.5	19.856	0	0	0	0	0	0	1384400	304380	1080000	Q8N183;D6RA56	Q8N183;D6RA56	Mimitin, mitochondrial	NDUFAF2	2
NaN	0.18145	NaN				1	3.4	36.375	0	0	0	16385000	12046000	4339100	0	0	0	P12429;D6RA82;D6RFG5	P12429;D6RA82;D6RFG5	Annexin A3;Annexin	ANXA3	3
1.1173	1.0866	0.80048				3	11.5	34.95	19720000	6841400	12878000	25057000	8639200	16418000	16798000	7228200	9570200	D6REE5;P63244;H0Y8W2;J3KPE3;D6RAC2;H0YAM7;D6R9L0;D6R9Z1;H0YAF8;D6RFX4;H0Y8R5;D6RHH4;D6RBD0;D6RF23;H0Y9P0	D6REE5;P63244;H0Y8W2;J3KPE3;D6RAC2;H0YAM7;D6R9L0;D6R9Z1;H0YAF8;D6RFX4;H0Y8R5	Guanine nucleotide-binding protein subunit beta-2-like 1	GNB2L1	15
0.57782	1.3412	1.284				3	10.1	38.434	18506000	4458600	14047000	38005000	12869000	25136000	65639000	27435000	38204000	Q14103;Q14103-2;Q14103-3;Q14103-4;H0Y8G5;D6RAF8;H0YA96;D6RF44;D6RBQ9;D6RD83	Q14103;Q14103-2;Q14103-3;Q14103-4;H0Y8G5;D6RAF8;H0YA96;D6RF44;D6RBQ9;D6RD83	Heterogeneous nuclear ribonucleoprotein D0	HNRNPD	10
NaN	NaN	1.0162				1	5.2	21.863	0	0	0	0	0	0	11948000	5504300	6443600	P32969;H0Y9V9;D6RAN4;H0Y9R4	P32969;H0Y9V9;D6RAN4;H0Y9R4	60S ribosomal protein L9	RPL9	4
1.0312	1.1892	1.0027				2	8.3	29.945	81335000	32540000	48794000	90197000	33148000	57049000	65657000	29619000	36038000	P61247;D6RAT0;D6RG13;H0Y9Y4;E9PFI5;D6RB09;H0Y8L7;D6R9B6;D6RAS7;D6RED7;D6RGE0	P61247;D6RAT0;D6RG13;H0Y9Y4;E9PFI5;D6RB09;H0Y8L7;D6R9B6;D6RAS7;D6RED7;D6RGE0	40S ribosomal protein S3a	RPS3A	11
0.84801	0.80946	0.92475				1	6.9	16.008	2608500	1486600	1122000	6680600	3227600	3453100	8767300	4615100	4152300	D6RB85	D6RB85		CANX	1
0.84626	0.83639	NaN				2	6.6	35.936	5775800	2609000	3166700	6952800	2997500	3955300	0	0	0	P08758;D6RBL5;D6RBE9	P08758;D6RBL5;D6RBE9	Annexin A5;Annexin	ANXA5	3
NaN	NaN	NaN				1	2.7	58.47	0	0	0	0	0	0	0	0	0	O60749;O60749-2;D6RC15	O60749;O60749-2;D6RC15	Sorting nexin-2	SNX2	3
1.0467	1.0692	1.3014				1	0.6	175.48	3085700	1253900	1831800	4949800	1809800	3140000	3860500	1577300	2283200	Q6PGP7;D6RCE2	Q6PGP7;D6RCE2	Tetratricopeptide repeat protein 37	TTC37	2
0.069864	1.0135	0.89426				2	6.5	22.241	162880000	161960000	914680	702610	229450	473160	238110	104550	133560	D6RCQ1;D6REM9	D6RCQ1;D6REM9		RUFY3	2
0.80729	NaN	NaN				1	2.6	66.193	2881700	1515200	1366500	0	0	0	0	0	0	O75083;D6RD66	O75083;D6RD66	WD repeat-containing protein 1	WDR1	2
NaN	0.58498	NaN				1	6.2	17.699	0	0	0	15482	8180.3	7301.8	0	0	0	P20290-2;D6RDG3	P20290-2;D6RDG3		BTF3	2
1.417	NaN	1.4428				3	9.3	50.822	5268800	1754800	3514000	0	0	0	11381000	4341200	7040000	Q9NVA2-2;D6RER5;Q9NVA2;D6RGI3;H0Y961;H0Y9G8;Q14141;B1AMS2;Q14141-4;Q14141-2;D6RDU5;Q14141-3;D6R9Y6;D6RDP1	Q9NVA2-2;D6RER5;Q9NVA2;D6RGI3;H0Y961;H0Y9G8	Septin-11	2017-09-11	14
0.14467	NaN	NaN				1	2.7	53.564	7296800	6949800	347060	0	0	0	0	0	0	Q8NEF3;D6RF76	Q8NEF3;D6RF76	Coiled-coil domain-containing protein 112	CCDC112	2
NaN	NaN	NaN				1	1	132.42	0	0	0	0	0	0	0	0	0	J3KQ40;O95759;Q0IIM8;J3KN75;Q0IIM8-3;Q0IIM8-2;D6RFZ2	J3KQ40;O95759;Q0IIM8;J3KN75;Q0IIM8-3;Q0IIM8-2;D6RFZ2	TBC1 domain family member 8;TBC1 domain family member 8B	TBC1D8;TBC1D8B	7
NaN	3.4362	NaN				1	5.2	35.98	0	0	0	7742600	1027500	6715100	0	0	0	P32322-3;P32322;E2QRB3	P32322-3;P32322;E2QRB3	Pyrroline-5-carboxylate reductase 1, mitochondrial	PYCR1	3
NaN	1.0197	NaN				1	6.4	17.676	0	0	0	2710800	1056200	1654500	0	0	0	Q8WVJ2;E5RFP0	Q8WVJ2;E5RFP0	NudC domain-containing protein 2	NUDCD2	2
1.4242	1.27	1.2973				1	3.9	36.067	4564600	1405400	3159200	5851000	1876500	3974500	6750300	2581000	4169300	Q16698;Q16698-2;E5RFV2;E5RJG7;E5RJD2	Q16698;Q16698-2;E5RFV2;E5RJG7;E5RJD2	2,4-dienoyl-CoA reductase, mitochondrial	DECR1	5
NaN	0.98141	NaN				1	3.3	30.344	0	0	0	4140100	2365200	1774900	0	0	0	O94903;E5RG77;E5RFX7;H0YBG2	O94903;E5RG77;E5RFX7;H0YBG2	Proline synthase co-transcribed bacterial homolog protein	PROSC	4
NaN	NaN	0.92399				1	3.3	36.694	0	0	0	0	0	0	4501100	2084000	2417000	P29218-3;P29218;H0YBL1;E5RIP7;E5RG13	P29218-3;P29218;H0YBL1;E5RIP7;E5RG13	Inositol monophosphatase 1	IMPA1	5
NaN	NaN	NaN				1	5	44.314	0	0	0	0	0	0	0	0	0	Q8NEZ2;Q8NEZ2-2;E5RG91;Q8NEZ2-3;E5RJX6;E5RHB8;E5RJ10	Q8NEZ2;Q8NEZ2-2;E5RG91;Q8NEZ2-3;E5RJX6;E5RHB8;E5RJ10	Vacuolar protein sorting-associated protein 37A	VPS37A	7
NaN	NaN	NaN				1	22.2	12.203	0	0	0	0	0	0	0	0	0	E5RGH3	E5RGH3		PABPC1	1
NaN	1.3329	1.1935				1	10.2	21.802	0	0	0	8655700	3080800	5574900	4451000	1784000	2667000	Q93045-2;Q93045;E5RGX5	Q93045-2;Q93045;E5RGX5	Stathmin-2;Stathmin	STMN2	3
NaN	NaN	NaN				1	1.2	136.97	0	0	0	0	0	0	0	0	0	Q6P1X5;E5RI28	Q6P1X5;E5RI28	Transcription initiation factor TFIID subunit 2	TAF2	2
NaN	NaN	0.45283				1	4.1	56.914	0	0	0	0	0	0	122510	72684	49825	Q6NXR4;E5RIH5	Q6NXR4;E5RIH5	TELO2-interacting protein 2	TTI2	2
1.0616	NaN	0.89497				1	2.1	87.156	1645700	676730	968930	0	0	0	2885000	1402400	1482600	Q9Y263;E5RIM3;H0YBW4	Q9Y263;E5RIM3;H0YBW4	Phospholipase A-2-activating protein	PLAA	3
NaN	0.8709	1.575				1	2.5	52.22	0	0	0	7988000	3454100	4533900	5115400	1613700	3501700	P60228;H0YBR5;E5RIT4	P60228;H0YBR5;E5RIT4	Eukaryotic translation initiation factor 3 subunit E	EIF3E	3
1.2207	0.98856	1.0205				1	4.9	18.72	4492900	1790500	2702400	7222900	2881200	4341700	2550600	1146400	1404200	E5RJR5;P63208;P63208-2;F8W8N3;E7ERH2	E5RJR5;P63208;P63208-2;F8W8N3;E7ERH2	S-phase kinase-associated protein 1	SKP1	5
NaN	NaN	NaN				1	2.7	63.836	0	0	0	0	0	0	0	0	0	Q86UE4;E5RJU9	Q86UE4;E5RJU9	Protein LYRIC	MTDH	2
NaN	NaN	NaN				1	2.4	75.872	0	0	0	0	0	0	0	0	0	P08133;P08133-2;E5RK69	P08133;P08133-2;E5RK69	Annexin A6;Annexin	ANXA6	3
NaN	NaN	NaN				1	1.3	117.01	0	0	0	0	0	0	0	0	0	Q9UI26-2;Q9UI26;E7EMB7	Q9UI26-2;Q9UI26;E7EMB7	Importin-11	IPO11	3
NaN	0.54701	0.49446				2	11.3	23.699	0	0	0	6467200	3590200	2877000	10422000	6415500	4006600	G3V3D1;E7EMS2;G3V3E8;H0YIZ1;P61916;J3KMY5;P61916-2;G3V2V8	G3V3D1;E7EMS2;G3V3E8;H0YIZ1;P61916;J3KMY5;P61916-2;G3V2V8	Epididymal secretory protein E1	NPC2	8
1.3853	NaN	1.2731				1	21.5	22.677	2679400	873050	1806300	0	0	0	1986200	805620	1180600	P62820;E7END7;P62820-2;P62820-3;P61006-2;Q92930;P51153;H0YNE9;H0YMN7;H0YL94;H0YLJ8	P62820;E7END7;P62820-2;P62820-3	Ras-related protein Rab-1A	RAB1A	11
1.0733	1.0322	0.97181				1	7.8	24.146	6412000	2563700	3848300	10096000	3859400	6236700	7914800	3599300	4315500	P61313;E7ENU7;E7EQV9;P61313-2;E7EX53	P61313;E7ENU7;E7EQV9;P61313-2;E7EX53	60S ribosomal protein L15;Ribosomal protein L15	RPL15	5
NaN	NaN	NaN				1	4.7	23.432	0	0	0	0	0	0	0	0	0	P50914;E7EPB3	P50914;E7EPB3	60S ribosomal protein L14	RPL14	2
2.3426	1.0802	1.5761				3	11.2	50.694	16926000	7256400	9670000	45445000	17888000	27557000	50820000	23479000	27340000	E7EPK1;Q16181;Q16181-2;E7ES33;G3V1Q4;A0A0U1RRE1;Q6ZU15;A0A0U1RRH9;A0A0U1RRM2	E7EPK1;Q16181;Q16181-2;E7ES33;G3V1Q4;A0A0U1RRE1	Septin-7	2017-09-07	9
NaN	0.73053	NaN				1	4.3	26.864	0	0	0	990450	480480	509970	0	0	0	E7EQ34;O14653-2;O14653;O14653-3;I3L4Z6;I3L1K7	E7EQ34;O14653-2;O14653;O14653-3;I3L4Z6;I3L1K7	Golgi SNAP receptor complex member 2	GOSR2	6
NaN	NaN	NaN				1	6	22.761	0	0	0	0	0	0	0	0	0	Q15363;E7EQ72	Q15363;E7EQ72	Transmembrane emp24 domain-containing protein 2	TMED2	2
NaN	2.052	NaN				1	3.6	42.794	0	0	0	1744500	480520	1264000	0	0	0	P51553;P51553-2;E7EQB8;G5E9Q7;E9PF84	P51553;P51553-2;E7EQB8;G5E9Q7;E9PF84	Isocitrate dehydrogenase [NAD] subunit gamma, mitochondrial	IDH3G	5
1.1116	1.1977	1.1664				3	5.6	71.456	24836000	10513000	14323000	4063400	1502600	2560700	19840000	8659000	11181000	Q13409;Q13409-5;Q13409-2;Q13409-7;Q13409-3;Q13409-6;E7EQL5;E7EV09;E7EMU4;E7ESD3;E7EQU2;E7ETL8;E7ET01;E7ERH4;E7ERR6;E7EUM4;E7EU01;E9PGG1	Q13409;Q13409-5;Q13409-2;Q13409-7;Q13409-3;Q13409-6;E7EQL5;E7EV09;E7EMU4;E7ESD3;E7EQU2;E7ETL8;E7ET01	Cytoplasmic dynein 1 intermediate chain 2	DYNC1I2	18
0.92566	0.85689	0.86351				3	5.5	69.371	42287000	19536000	22751000	33633000	14812000	18822000	115100000	59168000	55936000	E7EQR4;P15311	E7EQR4;P15311	Ezrin	EZR	2
NaN	NaN	1.3673				1	7	22.98	0	0	0	0	0	0	3006700	1114100	1892600	O15347;E7EQU1;E7ES08;E9PES6	O15347;E7EQU1;E7ES08;E9PES6	High mobility group protein B3	HMGB3	4
NaN	NaN	NaN				1	1.7	83.024	0	0	0	0	0	0	0	0	0	P51659-2;P51659;P51659-3;E7EWE5;E7ER27	P51659-2;P51659;P51659-3;E7EWE5;E7ER27	Peroxisomal multifunctional enzyme type 2;(3R)-hydroxyacyl-CoA dehydrogenase;Enoyl-CoA hydratase 2	HSD17B4	5
NaN	1.0792	NaN				1	1.8	60.343	0	0	0	12788000	4707300	8080800	0	0	0	P17987;E7ERF2;F5H136;F5H676;F5GZI8;F5H726	P17987;E7ERF2;F5H136;F5H676;F5GZI8;F5H726	T-complex protein 1 subunit alpha	TCP1	6
0.41925	NaN	NaN	+			1	1.6	71.355	1414200	973670	440520	0	0	0	0	0	0	O60941;E7EVB6;O60941-7;O60941-4;E9PEY4;O60941-2;O60941-5;O60941-3;F8W9U0;E7ES64;E9PE76;F8WD22	O60941;E7EVB6;O60941-7;O60941-4;E9PEY4;O60941-2;O60941-5;O60941-3;F8W9U0;E7ES64;E9PE76;F8WD22	Dystrobrevin beta	DTNB	12
NaN	0.021819	NaN				1	2	70.125	0	0	0	4396700	4352000	44717	0	0	0	F2Z2Y1;O95677;O95677-4;E9PLN6;O95677-2;O95677-5;E7ESD5;O95677-3	F2Z2Y1;O95677;O95677-4;E9PLN6;O95677-2;O95677-5;E7ESD5;O95677-3	Eyes absent homolog 4	EYA4	8
1.0603	1.1661	1.1328				4	11.4	50.227	7873300	3080400	4792800	8317500	3525900	4791600	15074000	6061900	9011800	Q9Y265;Q9Y265-2;E7ETR0	Q9Y265;Q9Y265-2;E7ETR0	RuvB-like 1	RUVBL1	3
NaN	0.65306	0.75451				1	1.8	87.097	0	0	0	4095500	2110600	1984900	5605400	2758900	2846500	O00469-2;O00469;E7ETU9;O00469-3	O00469-2;O00469;E7ETU9;O00469-3	Procollagen-lysine,2-oxoglutarate 5-dioxygenase 2	PLOD2	4
0.64452	1.1772	1.2971				3	1.2	377.13	3105400	1803500	1301900	9505700	2472300	7033400	2462600	1013600	1449000	Q14789-2;Q14789;Q14789-3;Q14789-4;E7EU81;H0Y867	Q14789-2;Q14789;Q14789-3;Q14789-4;E7EU81;H0Y867	Golgin subfamily B member 1	GOLGB1	6
0.9727	0.93893	0.95551				4	25.1	36.053	577040000	260140000	316900000	459840000	194420000	265420000	495310000	242250000	253060000	P04406;P04406-2;E7EUT5	P04406;P04406-2;E7EUT5	Glyceraldehyde-3-phosphate dehydrogenase	GAPDH	3
0.9497	0.85122	0.87362				8	5.9	245.44	24745000	10363000	14381000	27309000	11621000	15688000	25267000	13828000	11439000	E7EVA0;P27816;P27816-6;P27816-2;P27816-4;P27816-5;B5MEG9;H7C4C5;F8W9U4;H0Y2V1;H7C456	E7EVA0;P27816;P27816-6;P27816-2	Microtubule-associated protein;Microtubule-associated protein 4	MAP4	11
NaN	NaN	NaN				1	1.5	83.694	0	0	0	0	0	0	0	0	0	E7EVH7;Q07866-9;Q07866-4;G3V5R9;Q07866-6;Q07866-10;Q07866-5;G3V3H3;Q07866-7;F8W6L3;Q07866;Q07866-3;Q07866-2;G3V2E7;Q07866-8;G5E9S8;G3V2P7	E7EVH7;Q07866-9;Q07866-4;G3V5R9;Q07866-6;Q07866-10;Q07866-5;G3V3H3;Q07866-7;F8W6L3;Q07866;Q07866-3;Q07866-2;G3V2E7;Q07866-8;G5E9S8;G3V2P7	Kinesin light chain 1	KLC1	17
NaN	NaN	1.6718				1	4	27.572	0	0	0	0	0	0	2770300	1281900	1488400	Q08623-4;Q08623;Q08623-3;E7EVH9	Q08623-4;Q08623;Q08623-3;E7EVH9	Pseudouridine-5-monophosphatase	HDHD1	4
NaN	1.4645	2.0124				1	6.3	26.585	0	0	0	527550	182020	345530	339120	97675	241450	E9PF49;Q9Y6M9;E7EWZ0;E9PH64	E9PF49;Q9Y6M9;E7EWZ0;E9PH64	NADH dehydrogenase [ubiquinone] 1 beta subcomplex subunit 9	NDUFB9	4
0.89975	1.008	0.76747				2	1.4	205.42	28171000	11752000	16419000	15985000	6360000	9624700	17166000	9211000	7955400	E9PAV3;E9PAV3-2;Q13765;H0YHX9;F8W0W4;F8VNW4;F8VZJ2;F8W1N5	E9PAV3;E9PAV3-2;Q13765;H0YHX9;F8W0W4;F8VNW4;F8VZJ2;F8W1N5	Nascent polypeptide-associated complex subunit alpha	NACA	8
1.4239	1.1652	1.2932				4	9.7	47.958	9133600	3140100	5993500	9421400	2772900	6648500	33595000	14358000	19237000	P22234-2;P22234;E9PBS1;D6RF62	P22234-2;P22234;E9PBS1	Multifunctional protein ADE2;Phosphoribosylaminoimidazole-succinocarboxamide synthase;Phosphoribosylaminoimidazole carboxylase	PAICS	4
NaN	NaN	1.6826				1	2.8	52.314	0	0	0	0	0	0	6789000	2359100	4429900	Q16576-2;Q09028;Q16576;Q09028-2;E9PC52;Q09028-3;Q09028-4;Q5JP01;H0YF10	Q16576-2;Q09028;Q16576;Q09028-2;E9PC52;Q09028-3;Q09028-4;Q5JP01;H0YF10	Histone-binding protein RBBP4;Histone-binding protein RBBP7	RBBP4;RBBP7	9
NaN	NaN	0.85102				2	11.9	22.313	0	0	0	0	0	0	423310	200740	222580	P37235;P84074;E9PC71;E5RGA9;P61601;H7BZC1	P37235;P84074;E9PC71;E5RGA9;P61601;H7BZC1	Hippocalcin-like protein 1;Neuron-specific calcium-binding protein hippocalcin;Neurocalcin-delta	HPCAL1;HPCA;NCALD	6
NaN	0.92536	NaN				1	1.3	80.651	0	0	0	1890800	663550	1227300	0	0	0	Q9BYT8;E9PCB6;H0YAK4	Q9BYT8;E9PCB6;H0YAK4	Neurolysin, mitochondrial	NLN	3
NaN	NaN	1.6871				2	7.4	37.221	0	0	0	0	0	0	31833000	4152300	27681000	P16520;E9PCP0;P16520-2;F5H0S8;F5H100;F5H8J8;F5GZN8	P16520;E9PCP0;P16520-2;F5H0S8;F5H100;F5H8J8;F5GZN8	Guanine nucleotide-binding protein G(I)/G(S)/G(T) subunit beta-3	GNB3	7
0.5855	NaN	NaN				2	2.3	131.98	200750	110570	90175	0	0	0	0	0	0	O43795;E9PDF6;O43795-2;Q9UBC5;E7EQD9;H7C2Y7;C9JYW1	O43795;E9PDF6;O43795-2;Q9UBC5;E7EQD9;H7C2Y7;C9JYW1	Unconventional myosin-Ib;Unconventional myosin-Ia	MYO1B;MYO1A	7
1.7802	2.2957	1.323				3	6.6	47.731	11868000	3376600	8491400	27232000	8218400	19014000	45911000	17979000	27932000	Q96I99-2;Q96I99;E9PDQ8	Q96I99-2;Q96I99;E9PDQ8	Succinyl-CoA ligase [GDP-forming] subunit beta, mitochondrial	SUCLG2	3
1.4508	1.0616	1.1546				2	4.9	68.903	452680	173020	279670	411860	170910	240950	706150	298260	407890	E9PEB5;Q96AE4-2;Q96AE4;C9JSZ1	E9PEB5;Q96AE4-2;Q96AE4;C9JSZ1	Far upstream element-binding protein 1	FUBP1	4
NaN	NaN	0.95971				1	1.1	134.28	0	0	0	0	0	0	2576500	1518600	1058000	P00533;E9PFD7;Q504U8;P00533-3;P00533-4	P00533;E9PFD7;Q504U8;P00533-3;P00533-4	Epidermal growth factor receptor	EGFR	5
NaN	1.3565	NaN				2	8.2	31.566	0	0	0	10876000	3484900	7391500	0	0	0	Q9Y2Q3-2;Q9Y2Q3;Q9Y2Q3-3;E9PFN5;Q9Y2Q3-4;C9JNT3	Q9Y2Q3-2;Q9Y2Q3;Q9Y2Q3-3;E9PFN5;Q9Y2Q3-4;C9JNT3	Glutathione S-transferase kappa 1	GSTK1	6
NaN	NaN	NaN				1	2.3	69.991	0	0	0	0	0	0	0	0	0	Q14738;E9PFR3;Q14738-2;Q14738-3	Q14738;E9PFR3;Q14738-2;Q14738-3	Serine/threonine-protein phosphatase 2A 56 kDa regulatory subunit delta isoform	PPP2R5D	4
0.94246	0.82065	0.8865				2	5.2	62.663	2818500	1397300	1421200	2405300	1103700	1301600	2659600	1499600	1160000	Q05682-4;E9PGZ1;Q05682-5;Q05682;Q05682-2;Q05682-6;Q05682-3;E7EX44;C9J813	Q05682-4;E9PGZ1;Q05682-5;Q05682;Q05682-2;Q05682-6;Q05682-3;E7EX44;C9J813	Caldesmon	CALD1	9
2.3856	NaN	NaN				1	3.3	27.049	1325400	283310	1042100	0	0	0	0	0	0	Q9BUP3;E9PI87;Q9BUP3-2	Q9BUP3;E9PI87;Q9BUP3-2	Oxidoreductase HTATIP2	HTATIP2	3
NaN	NaN	NaN				1	1.9	69.967	329310	329310	0	0	0	0	0	0	0	Q9UQC2-2;E9PJE2;E9PJ26	Q9UQC2-2;E9PJE2;E9PJ26		GAB2	3
0.94562	0.89251	0.89883				0	25.7	70.897	602410000	278360000	324050000	511070000	192680000	318390000	995530000	461290000	534240000	P11142;E9PKE3;E9PNE6;P11142-2;E9PN89;E9PLF4;E9PK54;E9PQK7;E9PPY6;E9PN25;E9PS65;E9PI65;E9PM13;P17066	P11142;E9PKE3;E9PNE6;P11142-2;E9PN89;E9PLF4;E9PK54;E9PQK7;E9PPY6	Heat shock cognate 71 kDa protein	HSPA8	14
0.74586	NaN	NaN				1	1.4	98.484	160910	87197	73711	0	0	0	0	0	0	Q5H9R7-5;Q5H9R7;Q5H9R7-2;Q5H9R7-6;E9PKF6;H7BXH2;Q5H9R7-4;Q5H9R7-3;E9PQP7;H0YEN2	Q5H9R7-5;Q5H9R7;Q5H9R7-2;Q5H9R7-6;E9PKF6;H7BXH2;Q5H9R7-4;Q5H9R7-3;E9PQP7;H0YEN2	Serine/threonine-protein phosphatase 6 regulatory subunit 3	PPP6R3	10
NaN	NaN	NaN				1	27.9	23.092	0	0	0	0	0	0	0	0	0	E9PKH2	E9PKH2		SERPINH1	1
1.2093	1.046	1.2693				1	1.4	109.44	1248900	459830	789040	7102000	3268900	3833000	9275600	3689700	5585900	Q14697-2;Q14697;E9PKU7;F5H6X6	Q14697-2;Q14697;E9PKU7;F5H6X6	Neutral alpha-glucosidase AB	GANAB	4
1.0263	0.9987	0.97869				5	23.2	28.486	135970000	56906000	79060000	270360000	103830000	166520000	44602000	20627000	23975000	P23396-2;P23396;E9PL09;H0YEU2;E9PPU1;E9PSF4;H0YCJ7;E9PK82;F2Z2S8;E9PJH4;E9PQ96;E9PQX2	P23396-2;P23396;E9PL09;H0YEU2;E9PPU1;E9PSF4	40S ribosomal protein S3	RPS3	12
0.62764	0.87443	1.2436				2	26.9	22.171	2119500	882840	1236700	73274000	30194000	43080000	1756400	741760	1014700	Q9H0U4;E9PLD0;Q92928	Q9H0U4;E9PLD0;Q92928	Ras-related protein Rab-1B;Putative Ras-related protein Rab-1C	RAB1B;RAB1C	3
NaN	0.84682	NaN				3	3.5	103.28	0	0	0	13634000	6149500	7484600	0	0	0	P55786;E9PLK3;P55786-2;A6NEC2;E9PP11;A6NEC2-3;E9PPD4;E9PJY4;H0YCQ5	P55786;E9PLK3;P55786-2	Puromycin-sensitive aminopeptidase	NPEPPS	9
NaN	NaN	NaN				1	1.5	93.741	0	0	0	0	0	0	0	0	0	O75534-4;O75534-3;O75534;O75534-2;E9PLT0	O75534-4;O75534-3;O75534;O75534-2;E9PLT0	Cold shock domain-containing protein E1	CSDE1	5
NaN	NaN	NaN				1	4.3	40.576	0	0	0	0	0	0	0	0	0	E9PLX9	E9PLX9		CCDC67	1
NaN	1.0524	1.5				1	8.7	20.332	0	0	0	1220300	274120	946190	871130	303990	567140	O00193;E9PM92;E9PRZ9	O00193;E9PM92;E9PRZ9	Small acidic protein	SMAP;C11orf58	3
NaN	1.2023	1.2413				1	5.7	23.705	0	0	0	252660	81959	170700	209270	72963	136300	O00217;E9PPW7;F8W9K7;E9PN51	O00217;E9PPW7;F8W9K7;E9PN51	NADH dehydrogenase [ubiquinone] iron-sulfur protein 8, mitochondrial	NDUFS8	4
NaN	NaN	NaN				1	2.2	86.267	0	0	0	0	0	0	0	0	0	P49321-3;P49321;P49321-4;E9PPR5;E9PNB5	P49321-3;P49321;P49321-4;E9PPR5;E9PNB5	Nuclear autoantigenic sperm protein	NASP	5
NaN	0.48156	NaN				1	6.7	22.999	0	0	0	3043900	1780800	1263200	0	0	0	J3KNE7;Q16890;E9PPQ1;Q16890-5;E9PNK6;Q16890-2;Q16890-3;Q16890-4	J3KNE7;Q16890;E9PPQ1;Q16890-5;E9PNK6;Q16890-2;Q16890-3;Q16890-4	Tumor protein D53	TPD52L1	8
NaN	NaN	0.73361				1	6.2	14.529	0	0	0	0	0	0	7237200	3936800	3300300	E9PR17;P13987;E9PNW4	E9PR17;P13987;E9PNW4	CD59 glycoprotein	CD59	3
NaN	1.4714	NaN				1	4.5	30.692	0	0	0	2326300	606010	1720200	0	0	0	Q9BTT0;Q9BTT0-3;E9PPH5	Q9BTT0;Q9BTT0-3;E9PPH5	Acidic leucine-rich nuclear phosphoprotein 32 family member E	ANP32E	3
0.93063	1	1.0085				2	10.2	37.489	2001500	834690	1166800	1387700	565140	822510	3835000	1478700	2356300	Q9UHD1;Q9UHD1-2;E9PPQ5;E9PSD5;E9PIZ4	Q9UHD1;Q9UHD1-2;E9PPQ5;E9PSD5;E9PIZ4	Cysteine and histidine-rich domain-containing protein 1	CHORDC1	5
1.0629	0.99171	0.96753				4	14.3	31.324	54638000	21935000	32702000	128990000	49706000	79283000	6760400	2986200	3774200	P15880;E9PQD7;H0YEN5;E9PMM9;E9PPT0	P15880;E9PQD7;H0YEN5	40S ribosomal protein S2	RPS2	5
NaN	NaN	NaN				1	2.8	61.331	0	0	0	0	0	0	0	0	0	O00482;O00482-2;O00482-3;E9PQH2	O00482;O00482-2;O00482-3;E9PQH2	Nuclear receptor subfamily 5 group A member 2	NR5A2	4
NaN	NaN	NaN				1	44.4	18.727	0	0	0	0	0	0	0	0	0	E9PQQ4	E9PQQ4		HSPA8	1
NaN	0.0024687	NaN				1	1.7	184.7	0	0	0	137100000	136490000	615120	0	0	0	Q86VI3;F2Z2E2	Q86VI3;F2Z2E2	Ras GTPase-activating-like protein IQGAP3	IQGAP3	2
1.0999	1.041	0.97693				5	16.9	37.54	421560000	172050000	249500000	599540000	242760000	356780000	451000000	219240000	231760000	P37837;F2Z393	P37837;F2Z393	Transaldolase	TALDO1	2
2.8528	NaN	NaN				2	4.3	57.488	17141000	5518500	11623000	0	0	0	0	0	0	P78371;F5GWF6;P78371-2;F8VQ14	P78371;F5GWF6;P78371-2;F8VQ14	T-complex protein 1 subunit beta	CCT2	4
NaN	0.86973	0.97821				1	0.5	299.72	0	0	0	547690	188810	358880	351290	161260	190030	Q9H4A3-7;Q9H4A3-6;Q9H4A3-5;Q9H4A3;Q9H4A3-2;F5GWT4;Q9H4A3-4	Q9H4A3-7;Q9H4A3-6;Q9H4A3-5;Q9H4A3;Q9H4A3-2;F5GWT4;Q9H4A3-4	Serine/threonine-protein kinase WNK1	WNK1	7
1.1405	1.1912	1.0086				3	12.3	30.239	5880200	2270300	3610000	12753000	4447000	8305700	6102600	2710100	3392500	P25786-2;P25786;F5GX11;B4DEV8	P25786-2;P25786;F5GX11	Proteasome subunit alpha type-1	PSMA1	4
NaN	NaN	0.84409				1	3.6	46.476	0	0	0	0	0	0	1284100	730040	554080	Q5VW32;Q5VW32-2;F5GXQ0	Q5VW32;Q5VW32-2;F5GXQ0	BRO1 domain-containing protein BROX	BROX	3
1.0113	0.73021	1.0985				1	10.6	12.074	16337000	7177200	9160100	18115000	10947000	7167500	8734400	3723800	5010600	F5GXR3;P20962;F5H7R9	F5GXR3;P20962;F5H7R9	Parathymosin	PTMS	3
1.5275	1.0731	3.8463				1	4	33.296	11350000	3544900	7805300	10099000	3809500	6289100	6695300	2028800	4666500	Q99623;J3KPX7;F5GY37	Q99623;J3KPX7;F5GY37	Prohibitin-2	PHB2	3
1.2355	1.047	1.0852				1	0.9	126.97	11331000	4378500	6952500	13552000	5156700	8395600	29363000	13051000	16311000	Q16531;F5GY55	Q16531;F5GY55	DNA damage-binding protein 1	DDB1	2
1.0324	NaN	NaN				2	7.3	32.359	346240	158140	188110	0	0	0	0	0	0	F5GYJ8;F5H6Q1;J3KR44;Q96FW1;F5GYN4;F5H3F0	F5GYJ8;F5H6Q1;J3KR44;Q96FW1;F5GYN4;F5H3F0	Ubiquitin thioesterase OTUB1	OTUB1	6
NaN	NaN	1.3768				1	1.3	95.925	0	0	0	0	0	0	7979100	3098700	4880400	Q8NE71;Q8NE71-2;Q5STZ8;F5GYK6	Q8NE71;Q8NE71-2;Q5STZ8;F5GYK6	ATP-binding cassette sub-family F member 1	ABCF1	4
NaN	NaN	2.2412				1	3.3	44.659	0	0	0	0	0	0	2845900	743550	2102300	F5GYQ1;P61421;R4GN72;J3QL14	F5GYQ1;P61421;R4GN72;J3QL14	V-type proton ATPase subunit d 1	ATP6V0D1	4
NaN	0.78487	1.0017				2	10	23.85	0	0	0	676360	330710	345650	572960	277510	295450	Q9NZD2;F5H0U5;H0YFS9	Q9NZD2;F5H0U5;H0YFS9	Glycolipid transfer protein	GLTP	3
NaN	NaN	1.0436				1	4.5	23.025	0	0	0	0	0	0	1279900	585450	694430	Q15286;F5H157	Q15286;F5H157	Ras-related protein Rab-35	RAB35	2
NaN	NaN	NaN				1	3.9	31.307	0	0	0	0	0	0	0	0	0	Q9H9H4;F5H4M0;F5H1F6	Q9H9H4;F5H4M0;F5H1F6	Vacuolar protein sorting-associated protein 37B	VPS37B	3
NaN	NaN	NaN				1	2.5	55.233	0	0	0	0	0	0	0	0	0	F5H1T6	F5H1T6		ATP6V0A1	1
NaN	1.2179	1.4182				1	4.2	42.592	0	0	0	3354100	1009500	2344600	2364600	1061500	1303100	P39748;P39748-2;F5H1Y3	P39748;P39748-2;F5H1Y3	Flap endonuclease 1	FEN1	3
1.2067	1.1938	1.2045				3	4.3	110.61	16364000	6706000	9657800	10554000	3425300	7129100	46112000	20584000	25528000	F5H2F4;P11586;V9GYY3	F5H2F4;P11586	C-1-tetrahydrofolate synthase, cytoplasmic;Methylenetetrahydrofolate dehydrogenase;Methenyltetrahydrofolate cyclohydrolase;Formyltetrahydrofolate synthetase	MTHFD1	3
0.79305	0.97093	0.91477				1	1	121.68	9175500	4499700	4675700	8531600	3952200	4579400	10181000	5088000	5093200	O00159;O00159-3;F5H6E2;O00159-2	O00159;O00159-3;F5H6E2;O00159-2	Unconventional myosin-Ic	MYO1C	4
NaN	NaN	NaN				1	3.5	60.541	0	0	0	0	0	0	0	0	0	Q6DD88;F5H6I7	Q6DD88;F5H6I7	Atlastin-3	ATL3	2
0.84433	0.93224	0.95013				3	14	45.376	5610500	3103100	2507400	5946800	2847600	3099200	5926600	2815700	3111000	P61160-2;P61160;F5H6T1	P61160-2;P61160;F5H6T1	Actin-related protein 2	ACTR2	3
NaN	NaN	NaN				1	6.1	23.934	0	0	0	0	0	0	0	0	0	Q96GC5;Q96GC5-3;F5H702	Q96GC5;Q96GC5-3;F5H702	39S ribosomal protein L48, mitochondrial	MRPL48	3
NaN	1.1147	1.252				1	2.7	37.238	0	0	0	3470200	1262600	2207600	2351100	904020	1447100	O43414;F6UGJ8;O43414-2;H0Y4B0;F6QUN3;O43414-3	O43414;F6UGJ8;O43414-2;H0Y4B0;F6QUN3;O43414-3	ERI1 exoribonuclease 3	ERI3	6
0.8642	0.7545	0.73494				1	5.5	18.506	11203000	5268100	5935100	8539600	3927400	4612200	11630000	6177900	5451700	P60981;P60981-2;F6RFD5	P60981;P60981-2;F6RFD5	Destrin	DSTN	3
1.1374	1.1364	NaN				4	8	54.719	7796700	2910900	4885800	19570000	7341000	12229000	0	0	0	F6TLX2;Q9HC38;Q9HC38-2;I3L3Q4;Q9HC38-3;I3L1I0	F6TLX2;Q9HC38;Q9HC38-2;I3L3Q4	Glyoxalase domain-containing protein 4	GLOD4	6
0.60031	NaN	NaN	+			1	3.1	32.596	1529200	646050	883120	0	0	0	0	0	0	S4R435;Q9NQ39;F6U211;P46783	S4R435;Q9NQ39;F6U211;P46783	Putative 40S ribosomal protein S10-like;40S ribosomal protein S10	RPS10P5;RPS10	4
NaN	0.78647	NaN				2	6.5	41.331	0	0	0	16853000	7815600	9036900	0	0	0	P50502;Q8IZP2;Q3KNR6;F6VDH7;H7C3I1;Q8NFI4	P50502;Q8IZP2;Q3KNR6;F6VDH7;H7C3I1;Q8NFI4	Hsc70-interacting protein;Putative protein FAM10A4;Putative protein FAM10A5	ST13;ST13P4;ST13P5	6
1.0003	0.88379	1.0492				1	3.9	31.392	32213000	12941000	19272000	32313000	12423000	19890000	24943000	10938000	14004000	K7ERQ8;P51148-2;P51148;P20339;P61020;P20339-2;P61020-2;K7ERI8;F8VVK3;F8VUA5;F8VVZ0;F8VWU4;F8VWZ7;F8VSF8;F8VPW9;F8WD79;F8WCY6	K7ERQ8;P51148-2;P51148;P20339;P61020;P20339-2;P61020-2;K7ERI8;F8VVK3;F8VUA5;F8VVZ0;F8VWU4;F8VWZ7;F8VSF8;F8VPW9;F8WD79;F8WCY6	Ras-related protein Rab-5C;Ras-related protein Rab-5A;Ras-related protein Rab-5B	RAB5C;RAB5A;RAB5B	17
1.1571	1.1257	1.1348				1	3.2	38.746	5691300	2049300	3642000	9631500	3442500	6189100	4948600	2143300	2805300	P09651;P09651-2;F8W6I7;P09651-3;F8W646;F8VTQ5	P09651;P09651-2;F8W6I7;P09651-3;F8W646;F8VTQ5	Heterogeneous nuclear ribonucleoprotein A1	HNRNPA1	6
NaN	1.1227	0.96164				1	6.8	21.728	0	0	0	3958200	1461300	2496900	6389700	2030400	4359300	J3QQ67;Q07020;H0YHA7;G3V203;Q07020-2;F8VUA6	J3QQ67;Q07020;H0YHA7;G3V203;Q07020-2;F8VUA6	60S ribosomal protein L18	RPL18	6
NaN	1.1311	1.2098				2	12.1	22.34	0	0	0	8628800	2451200	6177600	9085200	3921300	5163900	F8VVA7;P61923;F8VYZ4;P61923-5;F8W156;F8VUC5;F8VXB1;P61923-4;F8VXR1;F8W651	F8VVA7;P61923;F8VYZ4;P61923-5;F8W156;F8VUC5;F8VXB1;P61923-4;F8VXR1;F8W651	Coatomer subunit zeta-1	COPZ1	10
NaN	NaN	NaN				1	26.4	30.906	0	0	0	0	0	0	0	0	0	F8VUG2	F8VUG2		KRT8	1
0.73193	1.0672	1.055				1	1.3	94.299	23024	11414	11610	40316	13675	26641	18179	7730.3	10448	Q96MT3;F8VUG8;F8W1J1;F8W1Q8	Q96MT3;F8VUG8;F8W1J1;F8W1Q8	Prickle-like protein 1	PRICKLE1	4
NaN	1.1531	NaN				2	10.1	22.092	0	0	0	9938300	3576500	6361800	0	0	0	O43583;F8VVL1	O43583;F8VVL1	Density-regulated protein	DENR	2
1.173	1.153	1.0685				3	16.7	34.273	88528000	34089000	54440000	54580000	19495000	35084000	58824000	26681000	32144000	P05388;F8VWS0;P05388-2;Q8NHW5;F8VU65;G3V210;F8VZS0;F8VW21;F8VRK7;F8VPE8;F8VQY6;F8VS58;F8W1K8	P05388;F8VWS0;P05388-2;Q8NHW5;F8VU65;G3V210	60S acidic ribosomal protein P0;60S acidic ribosomal protein P0-like	RPLP0;RPLP0P6	13
0.64991	NaN	NaN	+			1	18.3	7.9372	454350	223200	231150	0	0	0	0	0	0	F8VX16	F8VX16		SLC6A15	1
NaN	1.0877	0.84628				1	3	34.674	0	0	0	1080000	432970	647080	1020300	528050	492200	Q96GA7;F8VZ97	Q96GA7;F8VZ97	Serine dehydratase-like	SDSL	2
1.1101	NaN	NaN				1	5.4	26.477	734450	283040	451410	0	0	0	0	0	0	P54819;F8W1A4;P54819-2;P54819-5;P54819-3;P54819-6;F8VZG5;G3V213;P54819-4	P54819;F8W1A4;P54819-2;P54819-5;P54819-3;P54819-6;F8VZG5;G3V213;P54819-4	Adenylate kinase 2, mitochondrial	AK2	9
1.0747	0.99764	NaN				1	4.4	48.057	527190	258420	268770	334790	177980	156810	0	0	0	P05783;F8VZY9	P05783;F8VZY9	Keratin, type I cytoskeletal 18	KRT18	2
1.1924	0.86507	NaN				2	4.3	56.559	4997300	1918000	3079300	2020500	843620	1176900	0	0	0	P06576;H0YH81;F8W079;F8W0P7;H0YI37	P06576;H0YH81;F8W079;F8W0P7;H0YI37	ATP synthase subunit beta, mitochondrial;ATP synthase subunit beta	ATP5B	5
NaN	NaN	0.099391				1	5.2	30.777	0	0	0	0	0	0	5106400	4935100	171250	P02647;F8W696	P02647;F8W696	Apolipoprotein A-I;Truncated apolipoprotein A-I	APOA1	2
NaN	NaN	NaN				1	2.3	116.64	0	0	0	0	0	0	0	0	0	Q14157-5;Q14157;F8W726;Q14157-3;Q14157-1;Q14157-4	Q14157-5;Q14157;F8W726;Q14157-3;Q14157-1;Q14157-4	Ubiquitin-associated protein 2-like	UBAP2L	6
NaN	NaN	0.82512	+			1	10.2	14.579	0	0	0	0	0	0	684500	453150	231350	F8W8A6	F8W8A6		HIBCH	1
1.4205	NaN	NaN				3	9.2	51.112	1983400	658050	1325300	0	0	0	0	0	0	O43493;F8W8W7;J3KQ45;O43493-3;O43493-5;O43493-2;O43493-4;O43493-6	O43493;F8W8W7;J3KQ45;O43493-3;O43493-5;O43493-2;O43493-4;O43493-6	Trans-Golgi network integral membrane protein 2	TGOLN2	8
NaN	0.87339	NaN				1	3.8	64.989	0	0	0	513020	223600	289430	0	0	0	Q9BY44;F8WAE5;Q9BY44-3;Q9BY44-4;Q9BY44-2;H7C5R5	Q9BY44;F8WAE5;Q9BY44-3;Q9BY44-4;Q9BY44-2;H7C5R5	Eukaryotic translation initiation factor 2A	EIF2A	6
NaN	NaN	NaN				1	4.2	89.425	0	0	0	0	0	0	0	0	0	O14782;F8WER6;F8WAR6	O14782;F8WER6;F8WAR6	Kinesin-like protein KIF3C	KIF3C	3
0.97188	0.8748	0.78955				2	16	20.762	9127500	4159000	4968600	5366200	2328400	3037700	6437700	3117800	3319900	H0Y7A7;E7ETZ0;P0DP23;P0DP24;P0DP25;G3V479;M0QZ52;F8WBR5;E7EMB3	H0Y7A7;E7ETZ0;P0DP23;P0DP24;P0DP25;G3V479;M0QZ52;F8WBR5;E7EMB3		CALM2;CALM1	9
NaN	0.67343	NaN				1	5.3	27.492	0	0	0	359110	190750	168360	0	0	0	Q9P0W5-4;F8WDG0	Q9P0W5-4;F8WDG0		SCHIP1	2
NaN	0.8811	NaN				1	0.9	85.018	0	0	0	2024600	886770	1137800	0	0	0	P17858;F8WEU2	P17858;F8WEU2	6-phosphofructokinase, liver type	PFKL	2
0.97634	NaN	NaN				1	5.4	30.608	2321500	954420	1367100	0	0	0	0	0	0	Q9NQR4;H7C579;F8WF70	Q9NQR4;H7C579;F8WF70	Omega-amidase NIT2	NIT2	3
5.6456	NaN	NaN				2	14.2	21.225	8508200	1052000	7456300	0	0	0	0	0	0	P02794;G3V192;G3V1D1;E9PPQ4	P02794;G3V192;G3V1D1;E9PPQ4	Ferritin heavy chain;Ferritin	FTH1	4
NaN	NaN	NaN				1	3.6	41.806	0	0	0	0	0	0	0	0	0	Q9BRK5;Q9BRK5-6;Q9BRK5-2;G3V1E2;Q9BRK5-3;H0Y3T6;Q9BRK5-4	Q9BRK5;Q9BRK5-6;Q9BRK5-2;G3V1E2;Q9BRK5-3;H0Y3T6;Q9BRK5-4	45 kDa calcium-binding protein	SDF4	7
0.88605	NaN	0.78812				3	5.5	70.311	3286900	1658200	1628700	0	0	0	8634800	4797000	3837800	O14975;O14975-2;G3V1R7	O14975;O14975-2;G3V1R7	Very long-chain acyl-CoA synthetase	SLC27A2	3
0.07938	NaN	NaN				1	8	25.308	1915600	1872800	42785	0	0	0	0	0	0	Q9BUA6;P10916;G3V1V8	Q9BUA6;P10916;G3V1V8	Myosin regulatory light chain 10;Myosin regulatory light chain 2, ventricular/cardiac muscle isoform	MYL10;MYL2	3
NaN	NaN	1.0953				2	7.9	35.386	0	0	0	0	0	0	3378600	1582900	1795700	Q8TC12;G3V234;G3V2G6;Q8TC12-2;Q8TC12-3;H0YJ46;H0YIZ8;H0YJ10	Q8TC12;G3V234;G3V2G6;Q8TC12-2;Q8TC12-3;H0YJ46;H0YIZ8;H0YJ10	Retinol dehydrogenase 11	RDH11	8
1.0202	1.3897	NaN				1	4	28.147	10537000	4387300	6150000	6695100	1886800	4808300	0	0	0	G3V5Z7;P60900;P60900-2;G3V295;P60900-3	G3V5Z7;P60900;P60900-2;G3V295;P60900-3	Proteasome subunit alpha type;Proteasome subunit alpha type-6	PSMA6	5
NaN	NaN	1.0688				1	5.5	24.976	0	0	0	0	0	0	1949200	819540	1129600	P49755;G3V2K7	P49755;G3V2K7	Transmembrane emp24 domain-containing protein 10	TMED10	2
NaN	1.5533	NaN				1	2.8	38.499	0	0	0	5037400	1564300	3473200	0	0	0	Q8N8N7;G3V3Y1;Q8N8N7-2	Q8N8N7;G3V3Y1;Q8N8N7-2	Prostaglandin reductase 2	PTGR2	3
0.84797	0.81545	0.74672				1	0.8	163.71	44943000	23305000	21638000	78064000	35251000	42813000	117900000	60911000	56986000	Q9UHC1;Q9UHC1-2;G3V419	Q9UHC1;Q9UHC1-2;G3V419	DNA mismatch repair protein Mlh3	MLH3	3
NaN	0.95851	0.89474				2	12.7	17.512	0	0	0	9547400	3681900	5865500	11433000	5353200	6079600	G3V4P8;P60983	G3V4P8;P60983	Glia maturation factor beta	GMFB	2
NaN	NaN	NaN				1	0.7	227.58	0	0	0	0	0	0	0	0	0	Q15643;G3V4R7	Q15643;G3V4R7	Thyroid receptor-interacting protein 11	TRIP11	2
NaN	NaN	NaN				1	4.5	49.184	0	0	0	0	0	0	0	0	0	P62191;P62191-2;G3V4X1	P62191;P62191-2;G3V4X1	26S protease regulatory subunit 4	PSMC1	3
NaN	NaN	NaN				2	10.2	28.433	0	0	0	0	0	0	0	0	0	P25788;P25788-2;G3V4X5;H0YJ03	P25788;P25788-2;G3V4X5;H0YJ03	Proteasome subunit alpha type-3	PSMA3	4
NaN	NaN	NaN				1	1.6	96.331	0	0	0	0	0	0	0	0	0	Q9GZR7;G3V529;Q9GZR7-2	Q9GZR7;G3V529;Q9GZR7-2	ATP-dependent RNA helicase DDX24	DDX24	3
NaN	NaN	NaN				1	1	159.83	0	0	0	0	0	0	0	0	0	Q96PC5;G3V599;O15320-5;O15320;O15320-10;O15320-3;O15320-4;O15320-2;O15320-7;O15320-6;O15320-8;O15320-9	Q96PC5;G3V599;O15320-5;O15320;O15320-10;O15320-3;O15320-4;O15320-2;O15320-7;O15320-6;O15320-8;O15320-9	Melanoma inhibitory activity protein 2;Cutaneous T-cell lymphoma-associated antigen 5	MIA2;CTAGE5	12
NaN	NaN	NaN				1	2.7	66.136	0	0	0	51075	0	51075	0	0	0	O75909-4;O75909;G3V5E1;O75909-1	O75909-4;O75909;G3V5E1;O75909-1	Cyclin-K	CCNK	4
NaN	0.71782	NaN				1	5.2	26.688	0	0	0	2221100	1121700	1099400	0	0	0	Q9UEU0;G3V5I2;J3KMW2	Q9UEU0;G3V5I2;J3KMW2	Vesicle transport through interaction with t-SNAREs homolog 1B	VTI1B	3
0.28571	0.32171	0.30364				1	1.3	131.45	394070	289560	104500	369740	237640	132100	319200	236270	82921	P55011;P55011-3;G3XAL9	P55011;P55011-3;G3XAL9	Solute carrier family 12 member 2	SLC12A2	3
NaN	NaN	NaN				1	3.5	55.142	0	0	0	0	0	0	0	0	0	G5EA30;Q92879-4;Q92879;Q92879-6;Q92879-3;Q92879-2;Q92879-5	G5EA30;Q92879-4;Q92879;Q92879-6;Q92879-3;Q92879-2;Q92879-5	CUGBP Elav-like family member 1	CELF1	7
0.78368	1.3553	1.099				1	1.4	118.32	2270700	863100	1407600	3829600	823190	3006500	9799700	4171800	5627900	P53992;G5EA31	P53992;G5EA31	Protein transport protein Sec24C	SEC24C	2
1.0446	0.97814	NaN				2	2.7	83.398	1214600	478610	736000	1522000	624540	897460	0	0	0	O00429-6;O00429-8;O00429;O00429-2;G8JLD5;O00429-3;O00429-5;O00429-4;O00429-7;F8VZ52;B4DDQ3;F8VUJ9;F8W1W3;B4DPZ9;F8VYL3;F8VR28	O00429-6;O00429-8;O00429;O00429-2;G8JLD5;O00429-3;O00429-5;O00429-4;O00429-7;F8VZ52;B4DDQ3;F8VUJ9;F8W1W3;B4DPZ9;F8VYL3;F8VR28	Dynamin-1-like protein	DNM1L	16
0.62776	0.55729	NaN				1	1.3	81.537	2511800	1445300	1066500	3722500	1878800	1843700	0	0	0	P16070;P16070-5;P16070-7;P16070-3;P16070-4;P16070-6;P16070-17;P16070-8;P16070-16;P16070-10;P16070-11;P16070-13;P16070-14;P16070-12;P16070-18;H0Y2P0;H0YD13;H0YE40	P16070;P16070-5;P16070-7;P16070-3;P16070-4;P16070-6;P16070-17;P16070-8;P16070-16;P16070-10;P16070-11;P16070-13;P16070-14;P16070-12;P16070-18;H0Y2P0;H0YD13;H0YE40	CD44 antigen	CD44	18
0.78591	0.94522	0.736				1	2.8	61.277	5142800	2631500	2511300	5656700	2599500	3057200	6603500	3807300	2796200	Q15942;H0Y2Y8;Q15942-2;H7C3D3	Q15942;H0Y2Y8;Q15942-2;H7C3D3	Zyxin	ZYX	4
NaN	1.0148	1.0859				1	0.5	189.71	0	0	0	5592600	2500000	3092600	5965500	2562600	3402900	Q8N7X0;H0Y334;Q8N7X0-2;H0Y333	Q8N7X0;H0Y334;Q8N7X0-2;H0Y333	Androglobin	ADGB	4
0.8851	0.88882	0.83936				5	0.8	861.07	1366500	542890	823620	3174400	1391800	1782700	209950	107220	102730	H3BQK9;H3BPE1;Q9UPN3;Q9UPN3-2;Q9UPN3-3;Q9UPN3-4;H0Y390;Q9UPN3-5;E9PNZ4;E9PLY5;H0YD69	H3BQK9;H3BPE1;Q9UPN3;Q9UPN3-2;Q9UPN3-3;Q9UPN3-4;H0Y390;Q9UPN3-5	Microtubule-actin cross-linking factor 1, isoforms 1/2/3/5	MACF1	11
0.98185	1.2595	1.1462				2	10.4	41.905	16624000	6693200	9930700	19801000	7144600	12656000	21716000	9579000	12138000	H0Y449;P67809	H0Y449;P67809	Nuclease-sensitive element-binding protein 1	YBX1	2
0.93683	0.85727	1.0276				1	5.2	23.411	10252000	4383700	5868700	10119000	4014200	6105300	6927200	2995800	3931400	Q5T9B7;P00568;H0Y4J6	Q5T9B7;P00568;H0Y4J6	Adenylate kinase isoenzyme 1	AK1	3
1.2624	1.0786	1.2753				1	2.3	55.804	6294600	2509100	3785500	7240500	2820300	4420200	9466400	4076500	5389900	P12268;H0Y4R1	P12268;H0Y4R1	Inosine-5-monophosphate dehydrogenase 2	IMPDH2	2
1.3353	1.3653	1.1726				1	2.9	46.48	34750000	12676000	22074000	36502000	11458000	25044000	46270000	18954000	27317000	Q9HDC9;H0Y512;Q9HDC9-2	Q9HDC9;H0Y512;Q9HDC9-2	Adipocyte plasma membrane-associated protein	APMAP;C20orf3	3
NaN	0.5486	NaN				1	0.5	272.32	0	0	0	357890	214080	143810	0	0	0	P02751-15;P02751-7;P02751;P02751-11;P02751-3;P02751-17;P02751-8;P02751-13;P02751-14;P02751-9;P02751-5;P02751-6;P02751-10;P02751-12;H0Y7Z1	P02751-15;P02751-7;P02751;P02751-11;P02751-3;P02751-17;P02751-8;P02751-13;P02751-14;P02751-9;P02751-5;P02751-6;P02751-10;P02751-12;H0Y7Z1	Fibronectin;Anastellin;Ugl-Y1;Ugl-Y2;Ugl-Y3	FN1	15
NaN	NaN	NaN				1	0.5	213.86	27397000	27397000	0	123410000	123410000	0	0	0	0	Q96MT7-2;H0Y853	Q96MT7-2;H0Y853		WDR52	2
1.1772	1.4399	1.0035				2	1.6	125.54	3266600	1354800	1911800	45023000	16806000	28217000	69759000	30970000	38789000	O00410-3;H0Y8C6;O00410;O00410-2	O00410-3;H0Y8C6;O00410;O00410-2	Importin-5	IPO5	4
NaN	NaN	NaN				1	6.8	15.435	0	0	0	0	0	0	0	0	0	H0Y8N5	H0Y8N5		PPWD1	1
0.92515	0.64691	0.70114				1	5.8	41.937	1010200	508890	501350	551080	284830	266260	741230	460300	280930	P48729-2;P48729;U3KQK7;H0Y9X2;U3KPX3;U3KQ83	P48729-2;P48729;U3KQK7;H0Y9X2;U3KPX3;U3KQ83	Casein kinase I isoform alpha	CSNK1A1	6
0.93283	1.3512	1.4038				2	3	74.139	12108000	4446100	7662200	3542200	1331000	2211100	13325000	4908300	8416700	P02545;P02545-3;P02545-6;P02545-4;P02545-2;P02545-5;Q5TCI8;Q3BDU5;H0YAB0	P02545;P02545-3;P02545-6;P02545-4;P02545-2;P02545-5;Q5TCI8;Q3BDU5;H0YAB0	Prelamin-A/C;Lamin-A/C	LMNA	9
NaN	NaN	NaN				1	1.9	88.105	0	0	0	0	0	0	0	0	0	Q05209;H0YC15	Q05209;H0YC15	Tyrosine-protein phosphatase non-receptor type 12	PTPN12	2
1.5975	1.2135	1.0927				4	18.3	31.17	1315300	279460	1035800	14879000	4913100	9965900	5587000	2373300	3213700	H0YC42;P55327-3;P55327-6;P55327-5;P55327-7;P55327;P55327-4;P55327-2;P55327-8;H0YC44;E5RFR7	H0YC42;P55327-3;P55327-6;P55327-5;P55327-7;P55327;P55327-4;P55327-2;P55327-8;H0YC44;E5RFR7	Tumor protein D52	MRPS28;TPD52	11
0.97223	1.1957	0.96175				1	1.4	140.84	325190	145720	179470	412540	157450	255100	3734800	1249000	2485800	P55265-4;P55265;P55265-2;H0YCK3;P55265-3;P55265-5	P55265-4;P55265;P55265-2;H0YCK3;P55265-3;P55265-5	Double-stranded RNA-specific adenosine deaminase	ADAR	6
NaN	0.76196	0.1888				2	10.9	22.611	0	0	0	319300	173420	145880	188940	148160	40780	Q01995;H0YCU9	Q01995;H0YCU9	Transgelin	TAGLN	2
NaN	1.473	NaN				1	1.7	70.754	0	0	0	979840	332700	647140	0	0	0	Q13492;Q13492-5;Q13492-2;Q13492-3;Q13492-4;H0YEH1;H0YEF7;H0YD48;H0YCY1;H0YEY8;H0YE97	Q13492;Q13492-5;Q13492-2;Q13492-3;Q13492-4;H0YEH1;H0YEF7;H0YD48;H0YCY1;H0YEY8;H0YE97	Phosphatidylinositol-binding clathrin assembly protein	PICALM	11
NaN	1.0074	NaN				1	2.1	58.946	0	0	0	1507000	601360	905640	0	0	0	Q3LXA3;Q3LXA3-2;H0YCY6;I3L252	Q3LXA3;Q3LXA3-2;H0YCY6;I3L252	Bifunctional ATP-dependent dihydroxyacetone kinase/FAD-AMP lyase (cyclizing);ATP-dependent dihydroxyacetone kinase;FAD-AMP lyase (cyclizing)	DAK	4
NaN	NaN	NaN				1	6.6	22.231	0	0	0	0	0	0	0	0	0	H0YD16	H0YD16		TOR1AIP1	1
NaN	NaN	NaN				1	6.7	30.221	0	0	0	0	0	0	0	0	0	P52943-2;P52943;H0YFA4;H0YHD8	P52943-2;P52943;H0YFA4;H0YHD8	Cysteine-rich protein 2	CRIP2	4
NaN	1.4185	1.237				1	8.3	20.601	0	0	0	2702100	1025600	1676500	2673300	1172100	1501100	P61204;P84077;P61204-2;H0YGG7	P61204;P84077;P61204-2;H0YGG7	ADP-ribosylation factor 3;ADP-ribosylation factor 1	ARF3;ARF1	4
NaN	NaN	NaN				1	3.8	28.48	0	0	0	0	0	0	0	0	0	P28074;P28074-2;P28074-3;H0YJM8	P28074;P28074-2;P28074-3;H0YJM8	Proteasome subunit beta type-5	PSMB5	4
NaN	1.0094	1.3393				1	3.6	53.165	0	0	0	4577900	1777700	2800200	4170600	1510200	2660400	P23381;P23381-2;H0YJP3	P23381;P23381-2;H0YJP3	Tryptophan--tRNA ligase, cytoplasmic;T1-TrpRS;T2-TrpRS	WARS	3
1.396	1.0137	0.84023				1	4.2	38.324	2460400	1027100	1433300	4356900	1824300	2532700	2566300	1222300	1344000	Q00796;H0YLA4;H0YKB3;Q00796-2	Q00796;H0YLA4;H0YKB3;Q00796-2	Sorbitol dehydrogenase	SORD	4
1.1238	0.99315	0.98251				2	12.9	19.072	19574000	7996700	11577000	21172000	8376200	12796000	48860000	23177000	25683000	H0YKD8;P46779-3;P46779-2;P46779;H0YMF4;H0YLP6;P46779-5;P46779-4	H0YKD8;P46779-3;P46779-2;P46779;H0YMF4;H0YLP6;P46779-5;P46779-4	60S ribosomal protein L28	RPL28	8
NaN	NaN	NaN				1	2.4	46.374	0	0	0	0	0	0	0	0	0	P16930;H0YLC7	P16930;H0YLC7	Fumarylacetoacetase	FAH	2
1.1183	1.0065	1.1433				2	8.8	29.483	2204200	956600	1247600	16884000	6162500	10722000	9007600	3832100	5175600	P25789;H0YN18;P25789-2;H0YL69;H0YMZ1;H0YMA1;H0YMI6;H0YKT8;H0YKS0	P25789;H0YN18;P25789-2;H0YL69;H0YMZ1;H0YMA1;H0YMI6;H0YKT8;H0YKS0	Proteasome subunit alpha type-4;Proteasome subunit alpha type;Proteasome subunit beta type	PSMA4	9
1.2053	1.1796	1.0828				2	8.8	28.585	44855000	15815000	29040000	66271000	21737000	44535000	14172000	6120800	8050800	P39687;H0YN26;O43423;O95626	P39687;H0YN26;O43423;O95626	Acidic leucine-rich nuclear phosphoprotein 32 family member A;Acidic leucine-rich nuclear phosphoprotein 32 family member C;Acidic leucine-rich nuclear phosphoprotein 32 family member D	ANP32A;ANP32C;ANP32D	4
NaN	NaN	NaN				1	2	88.255	0	0	0	0	0	0	0	0	0	Q16666;Q16666-2;Q16666-6;Q16666-3;X6RHM1;H3BM18	Q16666;Q16666-2;Q16666-6;Q16666-3;X6RHM1;H3BM18	Gamma-interferon-inducible protein 16	IFI16	6
NaN	NaN	0.77282	+			1	7.5	15.685	0	0	0	0	0	0	1138400	591570	546830	H3BM68	H3BM68		CD276	1
NaN	0.77089	NaN				1	4.5	28.082	0	0	0	22179000	10031000	12147000	0	0	0	O15305;H3BV55;H3BRM0;H3BPH4;O15305-2;H3BNY9;H3BT06;H3BV34;H3BM92;H3BR08	O15305;H3BV55;H3BRM0;H3BPH4;O15305-2;H3BNY9;H3BT06;H3BV34;H3BM92;H3BR08	Phosphomannomutase 2	PMM2	10
0.064357	NaN	NaN				1	9	22.007	1046700	1003300	43353	0	0	0	0	0	0	H3BPK4;Q96A32;H3BN54;H3BML9	H3BPK4;Q96A32;H3BN54;H3BML9	Myosin regulatory light chain 2, skeletal muscle isoform	MYLPF	4
NaN	NaN	1.3587	+			1	6.5	17.328	0	0	0	0	0	0	95695	36024	59671	Q99471;H3BPF6;Q99471-3;H3BMQ1	Q99471;H3BPF6;Q99471-3;H3BMQ1	Prefoldin subunit 5	PFDN5	4
0.9681	NaN	1.8193				2	11.5	26.227	2454700	915220	1539500	0	0	0	2289700	1038500	1251200	O43809;H3BND3;H3BV41	O43809;H3BND3;H3BV41	Cleavage and polyadenylation specificity factor subunit 5	NUDT21	3
0.95519	NaN	NaN				3	3.7	128.3	288330	116600	171730	0	0	0	0	0	0	Q93009;Q93009-3;H3BND8;F5H2X1	Q93009;Q93009-3;H3BND8;F5H2X1	Ubiquitin carboxyl-terminal hydrolase 7;Ubiquitin carboxyl-terminal hydrolase	USP7	4
NaN	1.6306	1.1932				1	1.2	72.333	0	0	0	23226000	7208000	16018000	8521900	3492400	5029500	Q9BVA0;H3BPK1;H3BPD8	Q9BVA0;H3BPK1;H3BPD8	Katanin p80 WD40-containing subunit B1	KATNB1	3
1.4044	NaN	NaN				1	3.9	33.805	3809900	1430200	2379700	0	0	0	0	0	0	Q16775;Q16775-2;H3BPQ4;H3BPK3;Q16775-3;H3BQW8	Q16775;Q16775-2;H3BPQ4;H3BPK3;Q16775-3;H3BQW8	Hydroxyacylglutathione hydrolase, mitochondrial	HAGH	6
NaN	NaN	13.033	+			1	0.8	114.22	0	0	0	0	0	0	10329000	267930	10061000	Q9Y2M0;Q9Y2M0-2;H3BQ24	Q9Y2M0;Q9Y2M0-2;H3BQ24	Fanconi-associated nuclease 1	FAN1	3
0.94533	0.93854	0.93582				10	16.4	57.936	1312900000	594740000	718150000	1279800000	541980000	737860000	1664700000	828950000	835710000	P14618;P14618-2;P14618-3;H3BTN5;H3BQ34;B4DNK4;H3BR70;H3BTJ2;H3BUW1;H3BT25	P14618;P14618-2;P14618-3;H3BTN5;H3BQ34;B4DNK4	Pyruvate kinase isozymes M1/M2;Pyruvate kinase	PKM2	10
NaN	NaN	NaN				1	27.8	17.793	0	0	0	0	0	0	0	0	0	H3BR04	H3BR04		ALDOA	1
1.0415	1.0068	NaN				1	1.6	68.699	1365600	540970	824630	1001100	401150	600000	0	0	0	P15170-3;P15170-2;Q8IYD1;P15170;H3BR35	P15170-3;P15170-2;Q8IYD1;P15170;H3BR35	Eukaryotic peptide chain release factor GTP-binding subunit ERF3B;Eukaryotic peptide chain release factor GTP-binding subunit ERF3A	GSPT2;GSPT1	5
NaN	0.66854	NaN				1	1.8	99.554	0	0	0	2662100	1159000	1503000	0	0	0	H3BVG0;Q8N1F7;Q8N1F7-2;H3BRD9;H3BVE2	H3BVG0;Q8N1F7;Q8N1F7-2;H3BRD9;H3BVE2	Nuclear pore complex protein Nup93	NUP93	5
1.4772	0.9854	1.9908				2	7.7	48.442	1778400	609860	1168500	5770700	2627100	3143600	2159100	716830	1442300	P22695;H3BRG4;H3BSJ9;H3BUI9;H3BUE4	P22695;H3BRG4;H3BSJ9;H3BUI9;H3BUE4	Cytochrome b-c1 complex subunit 2, mitochondrial	UQCRC2	5
NaN	NaN	NaN				1	1.6	113.49	0	0	0	0	0	0	0	0	0	H3BSK8	H3BSK8		RBBP6	1
NaN	NaN	1.0673				1	5.6	15.945	0	0	0	0	0	0	1666700	779410	887340	Q14019;H3BT58	Q14019;H3BT58	Coactosin-like protein	COTL1	2
NaN	1.0386	1.0036				1	1	88.234	0	0	0	346370	130000	216370	367480	150970	216520	Q9UQ90;H3BTY6	Q9UQ90;H3BTY6	Paraplegin	SPG7	2
NaN	NaN	NaN				1	8	18.822	0	0	0	0	0	0	0	0	0	Q9Y2Y0;Q9Y2Y0-2;H3BU49	Q9Y2Y0;Q9Y2Y0-2;H3BU49	ADP-ribosylation factor-like protein 2-binding protein	ARL2BP	3
1.4106	1.14	1.1437				2	1.4	115.58	960480	319930	640550	1957500	582450	1375100	4118300	1774700	2343600	Q8WWM7-3;Q8WWM7;H3BUF6;Q8WWM7-2;Q8WWM7-9;Q8WWM7-4;Q8WWM7-5;Q8WWM7-8;Q8WWM7-6	Q8WWM7-3;Q8WWM7;H3BUF6;Q8WWM7-2;Q8WWM7-9;Q8WWM7-4;Q8WWM7-5;Q8WWM7-8;Q8WWM7-6	Ataxin-2-like protein	ATXN2L	9
NaN	NaN	NaN				1	4.1	47.377	0	0	0	0	0	0	0	0	0	P78356;P48426;P48426-2;H7BXS3	P78356;P48426;P48426-2;H7BXS3	Phosphatidylinositol 5-phosphate 4-kinase type-2 beta;Phosphatidylinositol 5-phosphate 4-kinase type-2 alpha	PIP4K2B;PIP4K2A	4
0.73554	0.80591	0.65652	+			1	1	163.08	73219000	37392000	35827000	112210000	56303000	55910000	105400000	59768000	45635000	Q6P1J6;Q6P1J6-3;H7BYX7	Q6P1J6;Q6P1J6-3;H7BYX7	Phospholipase B1, membrane-associated;Phospholipase A2;Lysophospholipase	PLB1	3
NaN	NaN	NaN				1	4.2	23.819	0	0	0	0	0	0	0	0	0	P23919;H7BZ20	P23919;H7BZ20	Thymidylate kinase	DTYMK	2
0.97381	0.95958	0.91522				13	25.8	57.116	528460000	237870000	290590000	950170000	407730000	542440000	890820000	447440000	443380000	P07237;H7BZ94;H0Y3Z3;I3L312;I3L398;I3L3U6;I3NI03;I3L0S0;I3L4M2;I3L3P5;I3L514;I3L1Y5	P07237;H7BZ94;H0Y3Z3	Protein disulfide-isomerase	P4HB	12
NaN	0.9642	NaN				2	7.5	35.536	0	0	0	12385000	6420600	5964700	0	0	0	Q53FA7;Q53FA7-2;H7BZH6	Q53FA7;Q53FA7-2;H7BZH6	Quinone oxidoreductase PIG3	TP53I3	3
1.1411	0.99256	1.0135				2	7.8	31.462	20612000	7602200	13010000	24524000	9569500	14955000	15587000	6972900	8614000	P10768;X6RA14;H7BZT7;U3KQT1	P10768;X6RA14;H7BZT7;U3KQT1	S-formylglutathione hydrolase	ESD	4
NaN	NaN	NaN				1	2.8	54.554	0	0	0	0	0	0	0	0	0	O60443;O60443-3;H7C3W1;H7C147	O60443;O60443-3;H7C3W1;H7C147	Non-syndromic hearing impairment protein 5	DFNA5	4
NaN	NaN	NaN				1	8.4	22.065	0	0	0	0	0	0	0	0	0	H7C1E4	H7C1E4		AP1S1	1
NaN	NaN	NaN				1	7.3	15.192	0	0	0	0	0	0	0	0	0	H7C2G0	H7C2G0		SH3BGR	1
NaN	1.0823	0.97259				1	13.8	11.755	0	0	0	284930	107530	177400	262490	136810	125680	H7C2M1	H7C2M1		SCLY	1
NaN	NaN	NaN				1	3.9	40.684	0	0	0	0	0	0	0	0	0	H7C2Q8;Q99848	H7C2Q8;Q99848	Probable rRNA-processing protein EBP2	EBNA1BP2	2
NaN	NaN	NaN				1	3.9	40.513	0	0	0	0	0	0	0	0	0	Q9UBS4;H7C2Y5	Q9UBS4;H7C2Y5	DnaJ homolog subfamily B member 11	DNAJB11	2
NaN	0.83912	NaN				1	2.2	43.547	0	0	0	14051000	5824500	8226300	0	0	0	H7C350	H7C350			1
NaN	1.1163	1.0188				1	1.3	100.67	0	0	0	7210300	2638700	4571600	7795800	3225900	4570000	Q9BXP5;Q9BXP5-3;Q9BXP5-2;Q9BXP5-4;Q9BXP5-5;H7C3A1	Q9BXP5;Q9BXP5-3;Q9BXP5-2;Q9BXP5-4;Q9BXP5-5;H7C3A1	Serrate RNA effector molecule homolog	SRRT	6
1.1128	NaN	1.0584				1	4	47.873	306120	129520	176590	0	0	0	250080	107070	143020	Q9UNS2;Q9UNS2-2;H7C3P9	Q9UNS2;Q9UNS2-2;H7C3P9	COP9 signalosome complex subunit 3	COPS3	3
1.0338	0.96466	1.0097				1	1.9	71.751	5024900	2035700	2989200	6960800	2827400	4133400	9291500	4497800	4793700	Q15637-5;Q15637;Q15637-2;Q15637-3;Q15637-7;Q15637-6;Q15637-4;H7C561	Q15637-5;Q15637;Q15637-2;Q15637-3;Q15637-7;Q15637-6;Q15637-4;H7C561	Splicing factor 1	SF1	8
NaN	0.87108	NaN				1	2	88.053	0	0	0	456400	182680	273720	0	0	0	P18084;H7C5U2;V9GZ57	P18084;H7C5U2;V9GZ57	Integrin beta-5;Integrin beta	ITGB5	3
1.4756	1.1986	1.3906				3	4.2	114.76	16869000	5312400	11557000	7571100	2524600	5046500	17471000	6952300	10518000	P16615;P16615-4;P16615-3;P16615-2;P16615-5;H7C5W9;Q93084-5;Q93084-6;Q93084;Q93084-7;Q93084-3;O14983;Q93084-2;Q93084-4;O14983-2;O14983-3	P16615;P16615-4;P16615-3;P16615-2;P16615-5;H7C5W9;Q93084-5;Q93084-6;Q93084;Q93084-7;Q93084-3;O14983;Q93084-2;Q93084-4;O14983-2;O14983-3	Sarcoplasmic/endoplasmic reticulum calcium ATPase 2;Sarcoplasmic/endoplasmic reticulum calcium ATPase 3;Sarcoplasmic/endoplasmic reticulum calcium ATPase 1	ATP2A2;ATP2A3;ATP2A1	16
0.83588	0.82789	0.91214				4	10.8	107.14	72519000	36466000	36053000	114880000	49334000	65546000	137630000	69147000	68482000	P12814-4;P12814-3;P12814;P12814-2;H9KV75;G3V2N5;G3V2W4;H7C5W8;A0A087WSZ2;Q08043;P35609;P35609-2;F6THM6	P12814-4;P12814-3;P12814;P12814-2;H9KV75	Alpha-actinin-1	ACTN1	13
2.3014	1.0233	1.3907				1	1.7	86.191	778080	412120	365960	1273800	495450	778380	781840	176080	605760	O14964;O14964-2;I3L1P5;I3L165;I3L2H4	O14964;O14964-2;I3L1P5;I3L165;I3L2H4	Hepatocyte growth factor-regulated tyrosine kinase substrate	HGS	5
NaN	NaN	1.9938				1	0.9	149.37	0	0	0	0	0	0	7630600	2166700	5463900	Q9BQG0-2;Q9BQG0;I3L1L3	Q9BQG0-2;Q9BQG0;I3L1L3	Myb-binding protein 1A	MYBBP1A	3
NaN	NaN	NaN				1	1.8	146.67	0	0	0	0	0	0	0	0	0	O75153;K7EIG1;I3L2B0	O75153;K7EIG1;I3L2B0	Protein KIAA0664	KIAA0664	3
NaN	NaN	NaN				1	9.2	16.695	0	0	0	0	0	0	0	0	0	I3L459;I3L4C0;I3L2X8;I3L3W1	I3L459;I3L4C0;I3L2X8;I3L3W1			4
NaN	2.5569	NaN				1	7.1	31.362	0	0	0	665860	142650	523220	0	0	0	Q07021;I3L3B0;I3L3Q7	Q07021;I3L3B0;I3L3Q7	Complement component 1 Q subcomponent-binding protein, mitochondrial	C1QBP	3
NaN	NaN	1.3436				1	9.7	17.517	0	0	0	0	0	0	160930	66384	94549	I3L3D5;P07737	I3L3D5;P07737	Profilin-1	PFN1	2
1.1534	1.0803	1.0484				8	24.9	50.394	2386300000	949810000	1436500000	2045700000	805360000	1240300000	2016200000	941550000	1074600000	P30838;I3L3I9;E9PNN6;C9JMC5;A8MYB8;C9JKT2;P43353;P43353-2;P48448;I3L1M4;E9PJV0;J3QS00;I3L1H6;I3L4E5	P30838;I3L3I9;E9PNN6;C9JMC5;A8MYB8;C9JKT2	Aldehyde dehydrogenase, dimeric NADP-preferring	ALDH3A1	14
1.0476	0.80813	0.97838				2	1.7	172.64	9086400	3986900	5099500	9700000	3703700	5996300	13273000	5957600	7315700	P33527-9;P33527;P33527-3;P33527-2;P33527-4;I3L4X2;P33527-5;P33527-7;P33527-6;P33527-8;A0A0A0MS99	P33527-9;P33527;P33527-3;P33527-2;P33527-4;I3L4X2;P33527-5;P33527-7;P33527-6;P33527-8;A0A0A0MS99	Multidrug resistance-associated protein 1	ABCC1	11
0.99444	NaN	NaN				1	10	16.694	1389000	594420	794630	0	0	0	0	0	0	J3KNF8	J3KNF8			1
1.0971	0.96907	0.98755				1	7.2	25.476	9539600	3412000	6127600	49982000	19336000	30646000	4953200	2527400	2425900	Q01130;Q01130-2;J3KP15;J3QL05	Q01130;Q01130-2;J3KP15;J3QL05	Serine/arginine-rich splicing factor 2	SRSF2	4
0.82137	NaN	1.0673				3	2.6	162.24	3637200	1945300	1691800	0	0	0	2768100	1224000	1544200	P30622;P30622-1;P30622-2;J3KP58;F5H0N7;F5H6A0;F6VGP8;F5H1T5;F5H270;F5H367	P30622;P30622-1;P30622-2;J3KP58;F5H0N7;F5H6A0	CAP-Gly domain-containing linker protein 1	CLIP1	10
1.0017	1.1356	1.0725				3	10.3	32.642	38028000	14936000	23092000	31757000	11162000	20595000	28422000	12882000	15541000	Q32Q12;P22392-2;J3KPD9;P15531-2;P15531;E7ERL0;E5RHP0;P22392;O60361;F6XY72	Q32Q12;P22392-2;J3KPD9;P15531-2;P15531;E7ERL0;E5RHP0	Nucleoside diphosphate kinase;Nucleoside diphosphate kinase A	NME1-NME2;NME1	10
0.69495	0.84934	0.77487				3	4.1	87.334	4420400	2125600	2294800	10020000	4533600	5486000	7700600	3631000	4069700	P42224;J3KPM9;P42224-2;D2KFR9;E7EPD2	P42224;J3KPM9;P42224-2	Signal transducer and activator of transcription 1-alpha/beta	STAT1	5
1.0008	0.9637	1.01				4	23	45.26	889060000	391430000	497630000	809200000	339420000	469780000	852400000	411100000	441290000	P04075-2;J3KPS3;P04075;H3BQN4;H3BPS8;H3BUH7;H3BU78;H3BMQ8;P05062;P09972;A0A087WXX2;H3BR68	P04075-2;J3KPS3;P04075;H3BQN4;H3BPS8;H3BUH7	Fructose-bisphosphate aldolase A;Fructose-bisphosphate aldolase	ALDOA	12
0.89007	0.93194	0.84611				5	14.9	46.937	39998000	19654000	20344000	29010000	12502000	16508000	32492000	16289000	16203000	J3KQ32;Q9NTK5;Q9NTK5-2;Q9NTK5-3;C9JTK6	J3KQ32;Q9NTK5;Q9NTK5-2	Obg-like ATPase 1	OLA1	5
1.3297	NaN	1.1317				1	7.8	19.325	3954000	1491900	2462200	0	0	0	4523800	1886900	2636900	J3KQ48;Q9Y3E5	J3KQ48;Q9Y3E5	Peptidyl-tRNA hydrolase 2, mitochondrial	PTRH2	2
NaN	NaN	NaN				1	2.4	48.915	0	0	0	0	0	0	0	0	0	J3KQL8;Q9BQE5	J3KQL8;Q9BQE5	Apolipoprotein L2	APOL2	2
0.84982	0.99161	NaN				2	19.7	27.139	1343600	432970	910600	1017300	307770	709560	0	0	0	J3KRY1;J3QQX2;P52565;J3KTF8;P52565-2;J3KRE2;J3KS60	J3KRY1;J3QQX2;P52565;J3KTF8;P52565-2;J3KRE2;J3KS60	Rho GDP-dissociation inhibitor 1	ARHGDIA	7
1.4812	1.4434	1.4112				2	3.7	54.099	1504900	498870	1006000	2334400	726230	1608100	1973300	736090	1237200	O43237;O43237-2;J3KRI4;J3KRZ2	O43237;O43237-2;J3KRI4;J3KRZ2	Cytoplasmic dynein 1 light intermediate chain 2	DYNC1LI2	4
NaN	NaN	NaN				1	1.1	116.2	2982400	0	2982400	3136300	0	3136300	0	0	0	O94832;J3QRN6;J3KRL0	O94832;J3QRN6;J3KRL0	Unconventional myosin-Id	MYO1D	3
NaN	NaN	NaN				1	7	25.913	0	0	0	0	0	0	0	0	0	Q7Z4W1;J3KS22;J3KRZ4	Q7Z4W1;J3KS22;J3KRZ4	L-xylulose reductase	DCXR	3
NaN	0.83061	0.76941				1	2.2	46.153	0	0	0	3951800	2040500	1911300	2684900	1376900	1308000	P60842;P60842-2;J3KT12;J3QS69;J3QL43;J3KTB5;J3KSZ0;J3QR64;J3KTN0	P60842;P60842-2;J3KT12;J3QS69;J3QL43;J3KTB5;J3KSZ0;J3QR64;J3KTN0	Eukaryotic initiation factor 4A-I	EIF4A1	9
1.1133	1.3075	1.2632				2	10.1	25.206	2187700	865450	1322200	7887000	2583600	5303400	3307300	1261200	2046100	P62993;P62993-2;J3QRL5;J3KT38	P62993;P62993-2;J3QRL5;J3KT38	Growth factor receptor-bound protein 2	GRB2	4
NaN	1.6486	1.475				1	3.9	69.086	0	0	0	2769100	711920	2057200	4366100	1856300	2509700	J3KTA4;P17844;P17844-2;J3QRQ7;J3KRZ1	J3KTA4;P17844;P17844-2;J3QRQ7;J3KRZ1	Probable ATP-dependent RNA helicase DDX5	DDX5	5
NaN	NaN	NaN				1	1.4	113.22	0	0	0	0	0	0	0	0	0	Q8ND04-2;Q8ND04;J3KTD7	Q8ND04-2;Q8ND04;J3KTD7	Protein SMG8	SMG8	3
1.2459	NaN	NaN				1	6.7	35.196	192990	69047	123940	0	0	0	0	0	0	Q96DH6;J3QKT5	Q96DH6;J3QKT5	RNA-binding protein Musashi homolog 2	MSI2	2
NaN	NaN	0.89367				2	6.9	45.626	0	0	0	0	0	0	4669300	1955100	2714200	P62195;J3QQM1;J3QSE0;P62195-2;J3QSA9;J3KRP2;J3QLH6;J3QRW1;J3KTQ9	P62195;J3QQM1;J3QSE0;P62195-2;J3QSA9;J3KRP2;J3QLH6;J3QRW1;J3KTQ9	26S protease regulatory subunit 8	PSMC5	9
1.4741	1.2353	1.3782				1	5.9	27.079	3920000	1302900	2617100	2113700	694790	1418900	1821100	701450	1119600	J9JIE6;Q9UM00;Q9UM00-2;J3QQY2	J9JIE6;Q9UM00;Q9UM00-2;J3QQY2	Transmembrane and coiled-coil domain-containing protein 1	TMCO1	4
NaN	1.4698	NaN				1	5.7	57.669	0	0	0	1118900	377550	741390	0	0	0	P51648-2;P51648;J3QRD1	P51648-2;P51648;J3QRD1	Fatty aldehyde dehydrogenase	ALDH3A2	3
NaN	NaN	0.91678				3	6.4	61.386	0	0	0	0	0	0	5450900	2174700	3276200	J3QRU1;P07947;P12931-2;P06241;P12931;P06241-2;J3KPD6;P08631;H0Y3C5;P08631-4;P07948;P08631-2;P08631-3;P07948-2;P06241-3	J3QRU1;P07947	Tyrosine-protein kinase Yes	YES1	15
0.85982	0.91599	0.94033				1	4	37.154	32979000	15511000	17468000	27254000	10977000	16277000	47674000	22284000	25390000	O43684;O43684-2;J3QT28;J3QSX4	O43684;O43684-2;J3QT28;J3QSX4	Mitotic checkpoint protein BUB3	BUB3	4
0.84417	0.84168	0.94108				3	4.4	103.98	5830500	2795400	3035000	8736900	3791100	4945700	10348000	4823000	5524500	Q13620;K4DI93;Q13620-1;Q13620-3;Q13619;A0A0A0MR50;Q13619-2;A6NE76	Q13620;K4DI93;Q13620-1;Q13620-3	Cullin-4B	CUL4B	8
0.94553	1.2549	0.95869				1	2.2	61.252	97282000	42543000	54739000	128110000	31664000	96449000	158440000	75475000	82961000	Q8IYT4;Q8IYT4-2;K7EIJ8;K7EM02	Q8IYT4;Q8IYT4-2;K7EIJ8;K7EM02	Katanin p60 ATPase-containing subunit A-like 2	KATNAL2	4
NaN	NaN	NaN				1	1.4	106.49	0	0	0	0	0	0	0	0	0	P36776;P36776-2;K7EKE6;K7EJE8;P36776-3	P36776;P36776-2;K7EKE6;K7EJE8;P36776-3	Lon protease homolog, mitochondrial	LONP1	5
NaN	0.92041	NaN	+			1	28.9	10.407	0	0	0	4897900	1749300	3148600	0	0	0	K7EJJ6	K7EJJ6			1
NaN	0.94927	0.75872				2	8.8	35.611	0	0	0	7825600	3578700	4246900	3960900	2123700	1837200	O75821;K7EL20;K7ENA8;K7ER90;K7EP16	O75821;K7EL20;K7ENA8;K7ER90;K7EP16	Eukaryotic translation initiation factor 3 subunit G	EIF3G	5
1.2764	1.5399	1.2435				1	7.4	44.468	3989900	1475600	2514300	4759400	1728600	3030800	5569300	2338300	3231100	Q16543;K7EL68	Q16543;K7EL68	Hsp90 co-chaperone Cdc37	CDC37	2
1.1493	1.0804	0.95702				1	2.8	47.074	34589000	14130000	20459000	15083000	6076200	9007200	39300000	20123000	19178000	O60664;O60664-3;O60664-4;K7ERZ3;K7EL96;K7ER39	O60664;O60664-3;O60664-4;K7ERZ3;K7EL96;K7ER39	Perilipin-3	PLIN3	6
NaN	0.7739	1.9047				1	3.6	30.375	0	0	0	5077200	1759900	3317300	4572900	1511100	3061800	O43760-2;O43760;K7ENG9;K7ELD9	O43760-2;O43760;K7ENG9;K7ELD9	Synaptogyrin-2	SYNGR2	4
NaN	1.4115	1.0802				2	4.3	60.192	0	0	0	15086000	4433800	10652000	11158000	5260000	5898300	K7ELL7;P14314;P14314-2	K7ELL7;P14314;P14314-2	Glucosidase 2 subunit beta	PRKCSH	3
1.0249	0.9522	1.0139				1	3.9	39.829	296140	121160	174980	223930	88263	135660	223410	87206	136200	P50552;K7EM16	P50552;K7EM16	Vasodilator-stimulated phosphoprotein	VASP	2
NaN	NaN	NaN				1	26.7	4.8036	0	0	0	0	0	0	0	0	0	K7EMF8	K7EMF8			1
NaN	NaN	NaN				1	1.8	117.78	0	0	0	0	0	0	0	0	0	P59045;P59045-2;P59045-3;K7EQV0;K7EMN8	P59045;P59045-2;P59045-3;K7EQV0;K7EMN8	NACHT, LRR and PYD domains-containing protein 11	NLRP11	5
1.0723	NaN	NaN				1	13.8	19.891	1484100	541810	942240	0	0	0	0	0	0	Q99497;K7EN27	Q99497;K7EN27	Protein DJ-1	PARK7	2
NaN	1.1686	NaN				1	2.1	53.5	0	0	0	2339800	853940	1485800	0	0	0	P26368;P26368-2;K7ENG2	P26368;P26368-2;K7ENG2	Splicing factor U2AF 65 kDa subunit	U2AF2	3
NaN	NaN	NaN				1	4.8	40.589	0	0	0	0	0	0	1012000	1012000	0	P17612;K7ENJ5	P17612;K7ENJ5	cAMP-dependent protein kinase catalytic subunit alpha	PRKACA	2
NaN	NaN	NaN				1	1.3	78.839	0	0	0	0	0	0	0	0	0	P52888;K7EP46	P52888;K7EP46	Thimet oligopeptidase	THOP1	2
NaN	0.44425	0.025159				2	6	49.84	489150	489150	0	13293	9059.9	4233	128430000	127640000	794440	Q9BXS5-2;Q9BXS5;E7ENJ6;K7EPJ8;K7EJL1;A0A087WZX7;K7ER75;K7EQ90	Q9BXS5-2;Q9BXS5;E7ENJ6;K7EPJ8;K7EJL1;A0A087WZX7;K7ER75;K7EQ90	AP-1 complex subunit mu-1	AP1M1	8
NaN	NaN	NaN	+			1	51.4	4.0428	0	0	0	0	0	0	0	0	0	K7EQ39	K7EQ39			1
NaN	0.92498	NaN				1	4.3	33.824	0	0	0	1624100	714460	909660	0	0	0	P19623;K7EQ47	P19623;K7EQ47	Spermidine synthase	SRM	2
NaN	NaN	NaN				1	5.2	23.412	0	0	0	0	0	0	0	0	0	Q6ZR64;P84157-2;K7EQX8	Q6ZR64;P84157-2;K7EQX8			3
NaN	NaN	1.3846	+			1	8.5	13.527	0	0	0	0	0	0	3185800	1330000	1855800	P62316;K7ERG4	P62316;K7ERG4	Small nuclear ribonucleoprotein Sm D2	SNRPD2	2
NaN	0.96635	0.83809				1	5.4	20.478	0	0	0	3079400	1267800	1811600	3305500	1632900	1672600	P51452;P51452-2;K7ES89	P51452;P51452-2;K7ES89	Dual specificity protein phosphatase 3	DUSP3	3
0.64665	0.95141	0.97772				3	10.2	41.92	16668000	7010600	9657500	22068000	10788000	11280000	20188000	9304300	10884000	Q99536;Q99536-3;Q99536-2;K7ESA3;K7EM19;K7ENX2	Q99536;Q99536-3;Q99536-2;K7ESA3;K7EM19;K7ENX2	Synaptic vesicle membrane protein VAT-1 homolog	VAT1	6
0.55779	0.73275	0.59115				2	10.1	49.857	16564000	11231000	5332900	8773400	4130000	4643400	20020000	13354000	6666200	Q9BUF5;K7ESM5;A0A0B4J269;Q13509;Q13509-2;K7EPE5;K7EN98;K7EL29;K7EJZ4;K7ERA8;K7EJ64;K7EQT3;K7ESQ3	Q9BUF5;K7ESM5;A0A0B4J269;Q13509;Q13509-2	Tubulin beta-6 chain;Tubulin beta-3 chain	TUBB6;TUBB3	13
NaN	1.3797	NaN				1	6.6	36.923	0	0	0	2558700	799960	1758700	0	0	0	M0QXB4;O14579;O14579-2;O14579-3;M0R061	M0QXB4;O14579;O14579-2;O14579-3;M0R061	Coatomer subunit epsilon	COPE	5
2.0318	1.6712	1.4388				1	3.7	50.464	3452800	783860	2668900	3260700	982150	2278500	3464600	1254400	2210200	Q3ZCQ8-2;Q3ZCQ8;M0R003;M0R1Y4;M0R047;M0R2D2;M0R303;M0R2Z3;M0QXC3	Q3ZCQ8-2;Q3ZCQ8;M0R003;M0R1Y4;M0R047;M0R2D2;M0R303;M0R2Z3;M0QXC3	Mitochondrial import inner membrane translocase subunit TIM50	TIMM50	9
NaN	NaN	NaN				1	3.7	56.598	0	0	0	0	0	0	0	0	0	Q15758;M0QXM4;Q15758-2;Q15758-3	Q15758;M0QXM4;Q15758-2;Q15758-3	Neutral amino acid transporter B(0)	SLC1A5	4
1.0576	0.94372	0.99373				2	5.7	24.104	9872300	4074400	5798000	14252000	5190400	9061700	21149000	9172400	11977000	M0QYS1;P40429;Q8J015;Q6NVV1	M0QYS1;P40429;Q8J015;Q6NVV1	60S ribosomal protein L13a;Putative 60S ribosomal protein L13a-like MGC87657	RPL13A;RPL13a	4
1.854	2.1805	17.746				0	8.7	35.904	44411000	11993000	32417000	11214000	2056700	9157700	26930000	337650	26592000	M0QYT0;M0QXS5;P14866-2;M0QZW4;M0R076	M0QYT0;M0QXS5;P14866-2;M0QZW4;M0R076			5
0.32161	0.96631	0.97418				3	11.4	18.431	14794000	6603000	8190800	44925000	17603000	27322000	21102000	9448100	11654000	P62280;M0QZC5	P62280;M0QZC5	40S ribosomal protein S11	RPS11	2
1.0228	NaN	0.86007				1	5.3	21.007	1160900	552250	608610	0	0	0	3189900	1476800	1713200	O75223;M0QZK8;O75223-3	O75223;M0QZK8;O75223-3	Gamma-glutamylcyclotransferase	GGCT	3
NaN	NaN	1.0214				3	14.7	25.333	0	0	0	0	0	0	981590	402230	579360	M0R0R2;P46782;M0R0F0;M0QZN2	M0R0R2;P46782;M0R0F0;M0QZN2	40S ribosomal protein S5;40S ribosomal protein S5, N-terminally processed	RPS5	4
NaN	NaN	NaN				1	12.5	37.627	0	0	0	0	0	0	0	0	0	M0R019	M0R019			1
NaN	0.6197	0.75084				1	1.6	88.549	0	0	0	11562000	6610400	4951200	13148000	8197500	4950100	Q13263;Q13263-2;M0R0K9	Q13263;Q13263-2;M0R0K9	Transcription intermediary factor 1-beta	TRIM28	3
0.55267	NaN	1.4773				1	8	20.762	2256000	639160	1616900	0	0	0	706040	269840	436200	Q02543;M0R117;M0R1A7;M0R3D6;M0R0P7	Q02543;M0R117;M0R1A7;M0R3D6;M0R0P7	60S ribosomal protein L18a	RPL18A	5
NaN	NaN	NaN				1	14.9	11.155	0	0	0	0	0	0	0	0	0	M0R0Q9	M0R0Q9			1
NaN	0.53052	NaN				2	11.2	33.232	0	0	0	2584300	1470700	1113600	0	0	0	P54920;M0R0Y2;M0R2M1;M0R213	P54920;M0R0Y2;M0R2M1;M0R213	Alpha-soluble NSF attachment protein	NAPA	4
NaN	1.3452	NaN				1	2.8	51.156	0	0	0	3032600	1038200	1994400	0	0	0	Q9Y230;Q9Y230-2;M0R0Y3;X6R2L4	Q9Y230;Q9Y230-2;M0R0Y3;X6R2L4	RuvB-like 2	RUVBL2	4
1.3815	2.0588	1.7301				1	6.4	35.816	1904000	872080	1031900	387740	88390	299350	285240	96760	188480	Q13011;M0R248	Q13011;M0R248	Delta(3,5)-Delta(2,4)-dienoyl-CoA isomerase, mitochondrial	ECH1	2
NaN	NaN	NaN				1	4.2	37.636	2342100	0	2342100	0	0	0	0	0	0	O00170	O00170	AH receptor-interacting protein	AIP	1
NaN	NaN	NaN				1	1	121.32	0	0	0	0	0	0	0	0	0	O00203;O00203-3	O00203;O00203-3	AP-3 complex subunit beta-1	AP3B1	2
1.1124	0.97084	0.87368				2	5.7	47.534	271590000	115350000	156240000	18578000	7529300	11049000	8963100	4264100	4699000	O00231-2;O00231;J3QS13	O00231-2;O00231;J3QS13	26S proteasome non-ATPase regulatory subunit 11	PSMD11	3
1.326	1.2283	1.1757				2	4.2	52.904	14545000	5367100	9177900	16953000	6462900	10490000	4747600	2205100	2542500	O00232;O00232-2	O00232;O00232-2	26S proteasome non-ATPase regulatory subunit 12	PSMD12	2
0.90447	0.88216	0.87986				6	26.6	26.922	102340000	43036000	59300000	119970000	50387000	69579000	54981000	28126000	26855000	O00299	O00299	Chloride intracellular channel protein 1	CLIC1	1
NaN	NaN	NaN				1	5.2	34.577	0	0	0	0	0	0	0	0	0	O00487	O00487	26S proteasome non-ATPase regulatory subunit 14	PSMD14	1
NaN	NaN	NaN				1	11.5	39.022	0	0	0	0	0	0	0	0	0	O00570	O00570	Transcription factor SOX-1	SOX1	1
NaN	NaN	NaN				1	0.9	123.9	0	0	0	0	0	0	0	0	0	O14776;O14776-2	O14776;O14776-2	Transcription elongation regulator 1	TCERG1	2
NaN	0.82773	2.0191				1	1.1	123.38	0	0	0	11905000	3809000	8095900	10211000	4253100	5957500	O14980	O14980	Exportin-1	XPO1	1
NaN	NaN	NaN				1	0.3	336.22	0	0	0	0	0	0	0	0	0	O15050	O15050	TPR and ankyrin repeat-containing protein 1	TRANK1	1
NaN	1.2089	NaN				1	0.8	144.73	0	0	0	4426000	1383700	3042300	0	0	0	O15067	O15067	Phosphoribosylformylglycinamidine synthase	PFAS	1
1.0289	0.76109	0.60799				1	6.2	20.546	305260	137870	167390	299130	129890	169240	424960	244030	180930	O15145	O15145	Actin-related protein 2/3 complex subunit 3	ARPC3	1
NaN	NaN	NaN				1	3.3	59.271	0	0	0	0	0	0	0	0	0	O15355	O15355	Protein phosphatase 1G	PPM1G	1
NaN	NaN	NaN				1	0.8	174.91	0	0	0	0	0	0	0	0	0	O15438-4;O15438;O15438-2	O15438-4;O15438;O15438-2	Canalicular multispecific organic anion transporter 2	ABCC3	3
0.29053	0.49959	0.77547				1	4.5	22.417	6568800	3255300	3313400	54262000	23748000	30514000	75641000	38273000	37368000	O15498;O15498-2	O15498;O15498-2	Synaptobrevin homolog YKT6	YKT6	2
NaN	NaN	NaN				1	6.7	23.436	0	0	0	0	0	0	6989600	6989600	0	O15520	O15520	Fibroblast growth factor 10	FGF10	1
NaN	NaN	NaN				1	2.3	56.65	0	0	0	0	0	0	0	0	0	O43175	O43175	D-3-phosphoglycerate dehydrogenase	PHGDH	1
NaN	NaN	0.99968				1	2.8	60.977	0	0	0	0	0	0	7920800	3872500	4048300	O43242;O43242-2	O43242;O43242-2	26S proteasome non-ATPase regulatory subunit 3	PSMD3	2
NaN	1.5757	1.4586				1	4	39.45	0	0	0	6822100	2064000	4758100	6223300	2297100	3926200	O43570;O43570-2	O43570;O43570-2	Carbonic anhydrase 12	CA12	2
0.75371	0.83382	0.82862				6	15	104.85	663150000	322570000	340580000	1333300000	597860000	735450000	1638600000	839900000	798710000	O43707;O43707-2;K7EJH8;F5GXS2;O43707-3;H7C144	O43707;O43707-2	Alpha-actinin-4	ACTN4	6
NaN	1.1696	1.233				1	3.3	62.942	0	0	0	697700	245390	452310	4227200	1360700	2866500	O43776	O43776	Asparagine--tRNA ligase, cytoplasmic	NARS	1
1.0558	1.0633	1.1132				14	51.3	36.019	2856000000	1146600000	1709400000	2031300000	746260000	1285100000	2258400000	1003900000	1254500000	O60218;C9JRZ8;C9JRZ8-2	O60218;C9JRZ8	Aldo-keto reductase family 1 member B10;Aldo-keto reductase family 1 member B15	AKR1B10;AKR1B15	3
0.78254	0.85429	0.79357				1	4.3	18.762	4164100	2133700	2030400	14526000	6434800	8090800	3498600	1900600	1598000	O60493;O60493-3	O60493;O60493-3	Sorting nexin-3	SNX3	2
1.175	1.1322	1.105				5	11.3	55.023	218660000	82589000	136070000	202600000	78221000	124380000	381310000	161630000	219670000	O60701;O60701-2;O60701-3;E7EV97;E7ETF4;E7ER83;E7ER95	O60701;O60701-2;O60701-3	UDP-glucose 6-dehydrogenase	UGDH	7
NaN	1.2927	NaN				1	1.2	109.19	0	0	0	10219000	3447100	6772100	0	0	0	O60763-2;O60763	O60763-2;O60763	General vesicular transport factor p115	USO1	2
NaN	NaN	NaN				1	3.5	57.673	0	0	0	0	0	0	0	0	0	O60832	O60832	H/ACA ribonucleoprotein complex subunit 4	DKC1	1
NaN	NaN	NaN				1	2.6	124.3	0	0	0	0	0	0	0	0	0	O75038-2	O75038-2			1
NaN	NaN	1.2017				1	0.5	254.41	0	0	0	0	0	0	700010	305690	394320	O75165	O75165	DnaJ homolog subfamily C member 13	DNAJC13	1
NaN	NaN	NaN				1	1.2	132.17	265820	265820	0	138740	138740	0	76695	76695	0	O75334-5;O75334-6	O75334-5;O75334-6			2
1.1442	1.1272	1.0163				25	13.4	281.63	200330000	78194000	122140000	317710000	120780000	196930000	472500000	226740000	245770000	O75369-8;O75369;O75369-9;O75369-2;O75369-3;O75369-6;O75369-7;E7EN95;O75369-4;O75369-5;A0A0A0MT44;H7C5L4;A0A0C4DGA1	O75369-8;O75369;O75369-9;O75369-2;O75369-3;O75369-6;O75369-7;E7EN95;O75369-4;O75369-5	Filamin-B	FLNB	13
NaN	NaN	NaN				1	4	38.925	0	0	0	0	0	0	0	0	0	O75477	O75477	Erlin-1	ERLIN1	1
1.4186	1.2252	1.1371				2	1.5	145.83	8204100	2891500	5312600	7330500	2683700	4646800	1982900	869200	1113700	O75533	O75533	Splicing factor 3B subunit 1	SF3B1	1
0.97674	0.99689	1.0352				4	14	46.659	22881000	9456700	13424000	17757000	7321500	10435000	42993000	21146000	21847000	O75874	O75874	Isocitrate dehydrogenase [NADP] cytoplasmic	IDH1	1
NaN	1.0338	NaN				1	1.2	99.752	0	0	0	1116000000	451860000	664140000	0	0	0	O75891-3;O75891;O75891-2	O75891-3;O75891;O75891-2	Cytosolic 10-formyltetrahydrofolate dehydrogenase	ALDH1L1	3
NaN	1.2686	1.1566				1	6.2	18.491	0	0	0	2804500	893410	1911100	1679900	642650	1037300	O75947;O75947-2	O75947;O75947-2	ATP synthase subunit d, mitochondrial	ATP5H	2
1.8866	1.1401	0.89199				4	14.3	37.432	4121800	808270	3313500	20586000	7897900	12688000	1928300	950850	977440	O76003	O76003	Glutaredoxin-3	GLRX3	1
NaN	NaN	NaN				1	11	13.331	0	0	0	0	0	0	0	0	0	O76070	O76070	Gamma-synuclein	SNCG	1
1.4239	NaN	NaN				1	2.5	74.605	300370	105010	195360	0	0	0	0	0	0	O76094;O76094-2	O76094;O76094-2	Signal recognition particle 72 kDa protein	SRP72	2
NaN	1.3855	NaN				1	1.3	67.454	0	0	0	1168400	356170	812180	0	0	0	O94826	O94826	Mitochondrial import receptor subunit TOM70	TOMM70A	1
1.1478	NaN	NaN				1	1.4	106.92	139790	52507	87286	0	0	0	0	0	0	O94906;O94906-2	O94906;O94906-2	Pre-mRNA-processing factor 6	PRPF6	2
0.89984	1.3918	1.1595				3	6.9	73.46	22317000	9833200	12484000	27690000	7977000	19713000	28906000	12200000	16706000	O94925;O94925-3;O94925-2;H7BZD1	O94925;O94925-3;O94925-2	Glutaminase kidney isoform, mitochondrial	GLS	4
NaN	1.2078	1.5257				2	3.2	83.353	0	0	0	1366100	489560	876550	1094900	417720	677210	O95202;O95202-3;O95202-2	O95202;O95202-3;O95202-2	LETM1 and EF-hand domain-containing protein 1, mitochondrial	LETM1	3
0.65576	0.98294	NaN				1	6.6	27.228	1630000	754030	876000	2905000	1049000	1856100	0	0	0	O95292	O95292	Vesicle-associated membrane protein-associated protein B/C	VAPB	1
NaN	NaN	0.99902				2	2.7	119.52	0	0	0	0	0	0	6503500	3024000	3479500	O95373	O95373	Importin-7	IPO7	1
NaN	NaN	NaN				1	2.2	51.417	0	0	0	0	0	0	0	0	0	O95674	O95674	Phosphatidate cytidylyltransferase 2	CDS2	1
1.0474	1.2626	0.81284				1	0.9	107.54	1184700	530860	653800	12462000	4770800	7691100	2669700	1321200	1348400	O95782;O95782-2	O95782;O95782-2	AP-2 complex subunit alpha-1	AP2A1	2
1.3996	NaN	1.4524				3	7	66.9	8599600	2914800	5684800	0	0	0	3099800	1128100	1971600	O95831;O95831-3;O95831-4;O95831-6;O95831-2;E9PMA0;O95831-5	O95831;O95831-3;O95831-4;O95831-6	Apoptosis-inducing factor 1, mitochondrial	AIFM1	7
NaN	NaN	NaN				1	8.7	19.206	0	0	0	0	0	0	0	0	0	O95881	O95881	Thioredoxin domain-containing protein 12	TXNDC12	1
NaN	NaN	NaN				1	11.1	9.925	0	0	0	0	0	0	0	0	0	O95969	O95969	Secretoglobin family 1D member 2	SCGB1D2	1
NaN	0.81632	0.81159				1	6.7	15.33	0	0	0	513730	216050	297680	1363000	698270	664700	P00167;P00167-3;P00167-2	P00167;P00167-3;P00167-2	Cytochrome b5	CYB5A	3
1.0875	1.0828	1.0877				10	23.3	39.837	1399500000	566020000	833520000	925800000	350320000	575480000	676520000	290690000	385830000	P00338-3;P00338;P00338-4;P00338-2;P00338-5;F5GXY2;F5GYU2;F5GXH2;F5H6W8;F5H5J4;F5GZQ4;F5GXU1;F5GWW2;F5GXC7;F5H8H6	P00338-3;P00338;P00338-4;P00338-2;P00338-5	L-lactate dehydrogenase A chain	LDHA	15
1.0151	1.007	1.0145				19	45.7	54.861	8486300000	3658400000	4827900000	10147000000	4274000000	5873200000	12715000000	6034000000	6680800000	P00352;Q5SYQ8;Q5SYQ9;Q5SYQ7	P00352	Retinal dehydrogenase 1	ALDH1A1	4
2.441	1.8783	2.4076				2	4.5	61.397	2381800	567180	1814600	19725000	5081600	14643000	3167600	897950	2269600	P00367;P00367-3;P00367-2;P49448	P00367;P00367-3;P00367-2;P49448	Glutamate dehydrogenase 1, mitochondrial;Glutamate dehydrogenase 2, mitochondrial	GLUD1;GLUD2	4
0.68941	NaN	1.3235				2	4.2	56.256	3217900	1698500	1519400	0	0	0	760930	352840	408090	P00390;P00390-3;P00390-2;P00390-4;P00390-5	P00390;P00390-3;P00390-2;P00390-4;P00390-5	Glutathione reductase, mitochondrial	GSR	5
1.0605	0.95593	0.83627				1	9.1	15.936	5340000	2259100	3080800	8423900	3536400	4887500	6423100	3303700	3119400	P00441	P00441	Superoxide dismutase [Cu-Zn]	SOD1	1
1.5758	0.95125	2.5294				1	5.5	24.579	1489800	549760	940010	4403700	1838800	2564900	2016900	817080	1199800	P00492	P00492	Hypoxanthine-guanine phosphoribosyltransferase	HPRT1	1
NaN	1.0652	1.7439				2	7	47.517	0	0	0	2912400	990970	1921400	3421600	1146600	2275000	P00505;P00505-2	P00505;P00505-2	Aspartate aminotransferase, mitochondrial	GOT2	2
0.97606	0.96203	1.0258				12	37.9	44.614	322380000	144340000	178040000	210530000	88364000	122170000	315670000	150330000	165340000	P00558;P00558-2;P07205	P00558;P00558-2	Phosphoglycerate kinase 1	PGK1	3
NaN	NaN	NaN				2	31.8	11.765	944480	944480	0	0	0	0	689660	689660	0	P01834	P01834	Ig kappa chain C region	IGKC	1
NaN	0.039104	NaN				4	32.3	14.914	0	0	0	13167000	13158000	9612.7	0	0	0	V9GYM3;P02652;V9GYE3;V9GYG9;V9GYS1;V9GYC1	V9GYM3;P02652;V9GYE3;V9GYG9;V9GYS1;V9GYC1	Apolipoprotein A-II;Truncated apolipoprotein A-II	APOA2	6
NaN	NaN	NaN				1	4	23.511	77865	77865	0	0	0	0	0	0	0	P02763;P19652	P02763;P19652	Alpha-1-acid glycoprotein 1;Alpha-1-acid glycoprotein 2	ORM1;ORM2	2
NaN	0.82525	0.66978				4	7.4	84.87	0	0	0	9637500	3927700	5709800	10101000	4879000	5222200	P02786;G3V0E5;F8WBE5	P02786;G3V0E5	Transferrin receptor protein 1;Transferrin receptor protein 1, serum form	TFRC	3
NaN	NaN	NaN				1	1.6	77.063	197870	197870	0	0	0	0	0	0	0	P02787	P02787	Serotransferrin	TF	1
NaN	1.1832	NaN				1	8.6	20.019	0	0	0	2260400	695200	1565200	0	0	0	P02792	P02792	Ferritin light chain	FTL	1
NaN	NaN	NaN				1	2.8	59.755	0	0	0	0	0	0	0	0	0	P04040	P04040	Catalase	CAT	1
0.8847	0.88102	0.89118				9	32.7	38.714	1469800000	699480000	770360000	1154000000	502390000	651630000	1203400000	608290000	595070000	P04083;Q5T3N1;Q5T3N0	P04083;Q5T3N1;Q5T3N0	Annexin A1;Annexin	ANXA1	3
NaN	1.1242	NaN				4	8.2	85.815	0	0	0	184510	73633	110880	0	0	0	P04150-3;P04150;P04150-10;P04150-8;P04150-6;P04150-2;P04150-9;P04150-5;P04150-7;P04150-11;P04150-12;P04150-13;Q3MSN4;D6RDA9;P04150-14;P04150-15;P04150-16	P04150-3;P04150;P04150-10;P04150-8;P04150-6;P04150-2;P04150-9;P04150-5;P04150-7;P04150-11;P04150-12;P04150-13;Q3MSN4;D6RDA9	Glucocorticoid receptor	NR3C1	17
NaN	NaN	NaN				1	3.6	48.534	0	0	0	728880	0	728880	0	0	0	P04181	P04181	Ornithine aminotransferase, mitochondrial;Ornithine aminotransferase, hepatic form;Ornithine aminotransferase, renal form	OAT	1
0.068533	0.050252	0.05816			+	6	8.4	66.038	58188000	56270000	1917900	30258000	28511000	1746700	46449000	45306000	1143200	P04264;CON__P04264;CON__ENSEMBL:ENSBTAP00000038253	P04264;CON__P04264	Keratin, type II cytoskeletal 1	KRT1	3
NaN	NaN	0.89309				1	7	49.585	0	0	0	0	0	0	6729200	2912100	3817100	P04350	P04350	Tubulin beta-4A chain	TUBB4A	1
0.90434	0.90253	0.93789				2	5.4	22.782	34983000	15693000	19290000	57874000	25385000	32490000	94052000	44148000	49904000	P04792	P04792	Heat shock protein beta-1	HSPB1	1
NaN	1.3427	NaN				1	2.2	69.283	0	0	0	1587000	448380	1138600	0	0	0	P04844;P04844-2	P04844;P04844-2	Dolichyl-diphosphooligosaccharide--protein glycosyltransferase subunit 2	RPN2	2
NaN	0.34977	1.0988				1	1.2	112.89	0	0	0	387740	177890	209850	1066900	461440	605500	P05023;P05023-4;P05023-3	P05023;P05023-4;P05023-3	Sodium/potassium-transporting ATPase subunit alpha-1	ATP1A1	3
1.8467	1.9155	1.794				4	8.7	56.381	61451000	16386000	45065000	97631000	24031000	73600000	101770000	26609000	75159000	P05091;P05091-2;F8VP50;S4R3S4	P05091;P05091-2;F8VP50;S4R3S4	Aldehyde dehydrogenase, mitochondrial	ALDH2	4
0.90002	1.0157	1.005				2	22.4	12.435	1249700	539170	710510	631520	246720	384800	1039700	491850	547850	A6NEL0;P05114;A6NL93;H7BXJ5;F2Z2Y5;F2Z2W6	A6NEL0;P05114;A6NL93;H7BXJ5;F2Z2Y5;F2Z2W6	Non-histone chromosomal protein HMG-14	HMGN1	6
NaN	0.4923	NaN				1	4	45.059	0	0	0	660620	430570	230050	0	0	0	P05121;P05121-2	P05121;P05121-2	Plasminogen activator inhibitor 1	SERPINE1	2
1.5387	1.2174	2.086				2	6.4	32.852	34444000	12204000	22240000	44761000	14388000	30373000	9387600	2682500	6705100	P05141;P12235;P12236;V9GYG0	P05141;P12235;P12236;V9GYG0	ADP/ATP translocase 2;ADP/ATP translocase 1;ADP/ATP translocase 3	SLC25A5;SLC25A4;SLC25A6	4
NaN	NaN	NaN				1	14	11.514	0	0	0	0	0	0	0	0	0	P05386	P05386	60S acidic ribosomal protein P1	RPLP1	1
0.93056	1.1294	1.0149				3	6.4	46.836	29891000	10867000	19024000	48232000	19540000	28692000	53310000	22809000	30501000	P05455;E7ERC4;E9PFL9;E9PGX9	P05455	Lupus La protein	SSB	4
1.0117	0.96238	1.0608				4	5.3	88.414	134860000	58340000	76524000	160980000	63817000	97168000	201770000	90448000	111320000	P05556;P05556-3;P05556-4;P05556-5;P05556-2	P05556;P05556-3;P05556-4;P05556-5;P05556-2	Integrin beta-1	ITGB1	5
1.0352	1.0071	0.99502				9	24.7	47.168	606400000	255660000	350740000	851710000	331330000	520380000	706330000	333140000	373190000	P06733;K7EM90;P06733-2	P06733;K7EM90	Alpha-enolase	ENO1	3
0.93467	0.99605	0.99037				2	2.1	97.147	2525200	1114100	1411100	3878100	1393400	2484800	4864300	2211500	2652800	P06737;P06737-2;E9PK47	P06737;P06737-2;E9PK47	Glycogen phosphorylase, liver form;Phosphorylase	PYGL	3
NaN	1.1913	1.2614				1	3.1	32.575	0	0	0	4804200	1708700	3095500	21083000	8936200	12147000	P06748;P06748-2;P06748-3	P06748;P06748-2;P06748-3	Nucleophosmin	NPM1	3
0.86838	0.92778	0.90307				4	20.2	28.87	244540000	104640000	139890000	213930000	84641000	129290000	21965000	9923200	12042000	P06753-5;P06753-2;P06753-4;Q5HYB6;Q5VU61;P06753-7;P06753;J3KN67;P06753-6;P06753-3;A0A087WWU8;D6R904;D6RFM2	P06753-5;P06753-2;P06753-4;Q5HYB6;Q5VU61;P06753-7;P06753;J3KN67;P06753-6;P06753-3;A0A087WWU8	Tropomyosin alpha-3 chain	DKFZp686J1372;TPM3	13
1.0143	1.1376	1.1003				2	3.7	52.948	226530000	98600000	127930000	115220000	45382000	69842000	183620000	87254000	96368000	P07099	P07099	Epoxide hydrolase 1	EPHX1	1
0.88038	0.86302	0.86781				11	31.7	36.638	1762300000	818040000	944270000	1471400000	645000000	826370000	1587800000	792150000	795680000	P07195;A8MW50;C9J7H8;F5H793	P07195;A8MW50;C9J7H8;F5H793	L-lactate dehydrogenase B chain;L-lactate dehydrogenase	LDHB	4
2.2101	2.6882	2.8444				3	12.4	20.863	943220	220370	722850	1386400	252470	1134000	5119200	1098900	4020300	P07305;P07305-2	P07305	Histone H1.0	H1F0	2
NaN	NaN	NaN				1	1.1	81.889	0	0	0	0	0	0	0	0	0	P07384	P07384	Calpain-1 catalytic subunit	CAPN1	1
0.95826	0.98582	0.94558				1	9.7	49.67	290720000	130540000	160180000	370620000	149480000	221140000	547190000	262440000	284750000	P07437;Q5JP53;Q5ST81	P07437;Q5JP53;Q5ST81	Tubulin beta chain	TUBB	3
1.3901	1.3618	1.4101				5	4.6	170.59	25026000	8715900	16310000	18376000	5984400	12392000	20169000	7681000	12488000	P07814;V9GYZ6	P07814;V9GYZ6	Bifunctional glutamate/proline--tRNA ligase;Glutamate--tRNA ligase;Proline--tRNA ligase	EPRS	2
0.55304	0.62798	0.6157				2	6.5	37.821	17245000	9423700	7821700	48287000	21390000	26897000	23181000	13155000	10026000	P07858	P07858	Cathepsin B;Cathepsin B light chain;Cathepsin B heavy chain	CTSB	1
1.1121	1.184	1.0767				4	11.8	98.16	521800000	214490000	307310000	666920000	264870000	402060000	751900000	338190000	413720000	P07900-2;P07900;Q58FG0;G3V2J8	P07900-2;P07900	Heat shock protein HSP 90-alpha	HSP90AA1	4
0.90754	0.79425	0.88354			+	5	19	32.989	23517000	10778000	12739000	26826000	12748000	14078000	16266000	7895500	8370400	P07951-2;CON__Q3SX28;P07951-3;Q5TCU3;Q5TCU8;P07951	P07951-2;CON__Q3SX28;P07951-3;Q5TCU3		TPM2	6
1.0784	1.0094	1.0471				8	12.6	71.122	110770000	44643000	66123000	102820000	42418000	60403000	158920000	67340000	91581000	P08195-4;J3KPF3;P08195;F5GZS6;P08195-3;P08195-2;F5H0E2;H0YFS2;F5H867;F5GZR9	P08195-4;J3KPF3;P08195;F5GZS6;P08195-3;P08195-2;F5H0E2;H0YFS2;F5H867	4F2 cell-surface antigen heavy chain	SLC3A2	10
1.0547	1.0577	1.0314				4	13.1	83.263	1362800000	561610000	801190000	1974700000	774610000	1200000000	2096100000	963890000	1132200000	P08238;Q58FF8;Q58FF7;Q14568;Q58FF6	P08238;Q58FF8	Heat shock protein HSP 90-beta;Putative heat shock protein HSP 90-beta 2	HSP90AB1;HSP90AB2P	5
NaN	NaN	NaN				1	2	69.81	0	0	0	0	0	0	0	0	0	P08240;P08240-2	P08240;P08240-2	Signal recognition particle receptor subunit alpha	SRPR	2
0.88163	0.94313	1.0155				3	21.4	23.356	37817000	16258000	21559000	265830000	103960000	161870000	7762400	3521200	4241200	P09211;A8MX94;A0A087X2E9;A0A087X243	P09211;A8MX94;A0A087X2E9	Glutathione S-transferase P	GSTP1	4
NaN	0.69719	NaN				2	13.9	25.789	0	0	0	1605700	743940	861770	0	0	0	P09417;P09417-2;D6RGG7;B7Z415;H0Y8F7	P09417;P09417-2;D6RGG7;B7Z415;H0Y8F7	Dihydropteridine reductase	QDPR	5
1.2971	1.4219	1.4472				8	30.7	24.893	64689000	20628000	44061000	95854000	28275000	67579000	10954000	4082700	6871000	P09429;Q5T7C4;B2RPK0;P23497	P09429;Q5T7C4;B2RPK0	High mobility group protein B1;Putative high mobility group protein B1-like 1	HMGB1;HMGB1P1	4
1.2672	NaN	0.43908				3	17.6	32.708	5098200	1870800	3227400	0	0	0	12685000	5339500	7345400	P09493;P09493-9;Q6ZN40;P09493-6;P09493-7;P09493-10;P09493-3;P09493-4;H0YL52;P09493-8;H0YK48;P09493-5;H0YNC7;H0YKP3;A0A087WTJ7;H0YKZ6;B7Z596;H7BYY1;F5H7S3;P09493-2;H0YL42;H0YLS7	P09493;P09493-9;Q6ZN40;P09493-6;P09493-7;P09493-10;P09493-3;P09493-4;H0YL52;P09493-8;H0YK48;P09493-5;H0YNC7;H0YKP3;A0A087WTJ7;H0YKZ6	Tropomyosin alpha-1 chain	TPM1	22
0.46257	0.39967	0.44597				6	19.7	35.882	213340000	130040000	83306000	44650000	27199000	17451000	54379000	37242000	17137000	P09525;Q6P452;P09525-2;B4E1S2	P09525;Q6P452;P09525-2	Annexin A4;Annexin	ANXA4	4
0.99834	1.0853	1.1272				4	11	54.177	21373000	9091900	12281000	20555000	8224800	12331000	49151000	22163000	26987000	P09622;P09622-3;E9PEX6;P09622-2;F2Z2E3;F8WDM5	P09622;P09622-3;E9PEX6;P09622-2;F2Z2E3;F8WDM5	Dihydrolipoyl dehydrogenase, mitochondrial	DLD	6
NaN	2.267	1.5172				1	1.4	113.08	0	0	0	2802500	833780	1968700	5386300	1998400	3388000	P09874	P09874	Poly [ADP-ribose] polymerase 1	PARP1	1
NaN	1.0756	0.94282				5	12.1	69.284	0	0	0	14275000	5655900	8618700	57563000	28391000	29172000	P09960;P09960-4;P09960-2;P09960-3	P09960;P09960-4;P09960-2;P09960-3	Leukotriene A-4 hydrolase	LTA4H	4
0.79245	0.48012	0.5652				1	19.7	6.0943	87524	42720	44804	75786	44658	31128	183840	101400	82440	P0DM35;P80294	P0DM35;P80294	Metallothionein-1H	MT1H	2
NaN	NaN	NaN				3	24.5	11.265	0	0	0	2609300	2609300	0	0	0	0	P0DOY3	P0DOY3			1
2.6638	1.8517	2.3147				1	17.8	21.865	8195200	1957800	6237500	8500800	2147000	6353800	3233600	788900	2444700	P10412;P16402;Q02539;P22492	P10412;P16402	Histone H1.4;Histone H1.3	HIST1H1E;HIST1H1D	4
0.014339	NaN	NaN				2	23.8	11.737	102990000	102130000	855080	0	0	0	0	0	0	P10599;P10599-2	P10599;P10599-2	Thioredoxin	TXN	2
0.72345	NaN	1.8567				1	2.6	56.232	7670000	4095800	3574100	0	0	0	1710600	930540	780060	X6R8A1;X6R5C5;P10619;P10619-2	X6R8A1;X6R5C5;P10619;P10619-2	Lysosomal protective protein;Lysosomal protective protein 32 kDa chain;Lysosomal protective protein 20 kDa chain	CTSA	4
2.1109	1.9894	2.0912				9	17.8	61.054	326460000	90961000	235500000	247400000	63856000	183540000	290430000	91862000	198570000	P10809;E7ESH4;E7EXB4	P10809	60 kDa heat shock protein, mitochondrial	HSPD1	3
0.92724	1.035	1.0712				10	18.2	72.332	97457000	38527000	58930000	52731000	19542000	33189000	274180000	124170000	150010000	P11021	P11021	78 kDa glucose-regulated protein	HSPA5	1
NaN	NaN	NaN				1	0.9	177.6	0	0	0	0	0	0	0	0	0	P11047	P11047	Laminin subunit gamma-1	LAMC1	1
0.9823	0.62096	0.85057				4	6.8	96.695	12644000	5267100	7377200	22292000	11369000	10923000	26896000	12894000	14002000	P11216;H0Y4Z6	P11216;H0Y4Z6	Glycogen phosphorylase, brain form;Phosphorylase	PYGB	2
1.2098	1.2391	1.1311				4	6.5	90.725	1586100	701830	884220	3075100	779280	2295800	5167800	2623900	2543900	P11387	P11387	DNA topoisomerase 1	TOP1	1
1.031	1.0816	2.902				2	6.8	63.826	10910000	4304200	6605500	23343000	8361500	14981000	34147000	13203000	20944000	P11413-2;P11413-3;P11413;E7EUI8	P11413-2;P11413-3;P11413;E7EUI8	Glucose-6-phosphate 1-dehydrogenase	G6PD	4
0.95505	NaN	NaN				3	11.2	39.724	1816000	813630	1002400	0	0	0	0	0	0	P11766;D6RFE4	P11766	Alcohol dehydrogenase class-3	ADH5	2
NaN	0.99369	NaN				1	5	28.768	0	0	0	5087200	2309000	2778100	0	0	0	P12004	P12004	Proliferating cell nuclear antigen	PCNA	1
NaN	NaN	NaN				1	0.5	267.29	0	0	0	0	0	0	0	0	0	P12270	P12270	Nucleoprotein TPR	TPR	1
NaN	NaN	NaN				1	11	16.572	0	0	0	0	0	0	0	0	0	P12273	P12273	Prolactin-inducible protein	PIP	1
1.3726	1.2396	1.252				8	10.1	82.704	75468000	29584000	45884000	139200000	47940000	91255000	196010000	80950000	115060000	P13010	P13010	X-ray repair cross-complementing protein 5	XRCC5	1
0.96627	1.0492	1.0306				6	7.6	95.337	136460000	45411000	91053000	211740000	73746000	137990000	190120000	80414000	109700000	P13639	P13639	Elongation factor 2	EEF2	1
0.96543	1.0678	1.0871				8	16.1	72.932	75486000	33569000	41917000	59386000	23156000	36230000	127350000	55712000	71634000	P13667	P13667	Protein disulfide-isomerase A4	PDIA4	1
1.5074	1.5895	1.6303				4	14.7	35.079	141970000	43395000	98577000	166860000	46935000	119920000	36936000	12680000	24256000	P13804;P13804-2;H0YLU7;H0YKF0;H0YL12;H0YK49;H0YNX6;H0YL83	P13804;P13804-2;H0YLU7;H0YKF0;H0YL12;H0YK49;H0YNX6	Electron transfer flavoprotein subunit alpha, mitochondrial	ETFA	8
0.92913	1.0594	0.97239				2	7.4	36.573	408010000	184150000	223850000	604800000	228640000	376160000	3806600	1663300	2143300	P14550;Q5T621;V9GYP9;V9GYG2	P14550;Q5T621;V9GYP9;V9GYG2	Alcohol dehydrogenase [NADP(+)]	AKR1A1	4
0.96584	0.89815	0.94326				8	11.1	92.468	99757000	43197000	56560000	286870000	119080000	167780000	378540000	180420000	198120000	P14625;Q96GW1;H0YIV0;F8W026	P14625;Q96GW1	Endoplasmin	HSP90B1	4
0.98404	1.0048	1.2867				2	2.3	117.97	4025000	1686200	2338800	11061000	4425300	6635400	7128500	2610100	4518400	P14735;P14735-2;Q5T5N3	P14735;P14735-2;Q5T5N3	Insulin-degrading enzyme	IDE	3
1.5763	1.6545	1.6364				1	8.7	64.132	1586400	526240	1060200	1643600	340890	1302700	3917400	1211300	2706100	P14866	P14866	Heterogeneous nuclear ribonucleoprotein L	HNRNPL	1
NaN	NaN	1.1409				1	2.6	57.136	0	0	0	0	0	0	3851700	1515700	2336000	P14868;P14868-2	P14868;P14868-2	Aspartate--tRNA ligase, cytoplasmic	DARS	2
0.91904	1.0413	0.95972				5	17.1	35.853	2809600000	1259400000	1550200000	2921600000	1148200000	1773400000	1966600000	946260000	1020300000	P15121;E9PCX2;E9PEF9	P15121;E9PCX2	Aldose reductase	AKR1B1	3
1.1398	1.0155	NaN				1	3.9	28.804	32426	13360	19066	38745	16110	22635	0	0	0	P18669;P15259	P18669;P15259	Phosphoglycerate mutase 1;Phosphoglycerate mutase 2	PGAM1;PGAM2	2
NaN	0.17307	0.28915				2	9.8	28.977	0	0	0	26428000	21402000	5026500	11737000	8679800	3057600	P15428;P15428-5;P15428-2;E9PBZ2;P15428-3;P15428-4;E9PD69	P15428;P15428-5;P15428-2;E9PBZ2;P15428-3;P15428-4;E9PD69	15-hydroxyprostaglandin dehydrogenase [NAD(+)]	HPGD	7
2.0855	1.3261	1.6061				1	2.2	38.809	3948400	912990	3035400	7134900	2376700	4758200	4420100	1821700	2598400	P15927-3;P15927-2;P15927;Q5TEJ7	P15927-3;P15927-2;P15927;Q5TEJ7	Replication protein A 32 kDa subunit	RPA2	4
0.94583	0.76499	0.80781				1	4.3	30.375	10144000	4099200	6045000	23834000	10562000	13272000	19020000	10343000	8676300	P16152	P16152	Carbonyl reductase [NADPH] 1	CBR1	1
1.5927	1.8189	1.9325				1	18.3	21.364	137490000	53658000	83828000	92307000	20452000	71855000	71463000	18601000	52862000	P16403	P16403	Histone H1.2	HIST1H1C	1
NaN	NaN	1.0372				1	1.3	76.689	0	0	0	0	0	0	12669000	5828000	6841100	P16435	P16435	NADPH--cytochrome P450 reductase	POR	1
0.82251	NaN	1.1064				1	14.1	17.302	24174	10729	13445	0	0	0	46437	21837	24600	P16949;P16949-2;A2A2D0	P16949;P16949-2;A2A2D0	Stathmin	STMN1	3
NaN	NaN	NaN				1	5.1	40.089	0	0	0	0	0	0	0	0	0	P16989;P16989-2	P16989;P16989-2	DNA-binding protein A	CSDA	2
1.5648	NaN	NaN				2	2.2	129.29	2236400	733790	1502700	0	0	0	0	0	0	P17301;E7ESP4;E7EMF1;E9PB77;D6RG08	P17301;E7ESP4;E7EMF1;E9PB77;D6RG08	Integrin alpha-2	ITGA2	5
1.2309	1.1083	1.2314				2	3.4	66.69	10184000	4132900	6051000	31769000	11999000	19770000	22456000	10103000	12352000	P17812	P17812	CTP synthase 1	CTPS	1
0.96216	0.88532	1.0708				3	11.3	29.225	32570000	13267000	19303000	44862000	18311000	26551000	37412000	17980000	19433000	P18124;A8MUD9	P18124;A8MUD9	60S ribosomal protein L7	RPL7	2
0.87701	0.82953	0.82062				6	6.4	123.8	140760000	62548000	78216000	164400000	72548000	91854000	136120000	68908000	67212000	P18206;P18206-2;Q5JQ13;P18206-3	P18206;P18206-2;Q5JQ13	Vinculin	VCL	4
1.5875	1.5545	1.4032				8	13.1	76.613	176540000	59592000	116940000	322830000	106230000	216600000	378530000	145710000	232820000	P19338;H7BY16	P19338;H7BY16	Nucleolin	NCL	2
NaN	1.2708	1.5456				3	16.8	23.593	0	0	0	9411100	3080600	6330500	12362000	4359400	8002800	P20340;P20340-2;P20340-3;F5GX61;F5H3K7;Q9NRW1;P20340-4;C9J0I2	P20340;P20340-2;P20340-3;F5GX61;F5H3K7	Ras-related protein Rab-6A	RAB6A	8
NaN	NaN	NaN				2	15.4	26.489	0	0	0	0	0	0	0	0	0	P20618	P20618	Proteasome subunit beta type-1	PSMB1	1
0.77818	0.82198	0.86621				6	45.6	20.567	51741000	25419000	26321000	19205000	8798900	10407000	23511000	11660000	11851000	P21291;E9PP21;E9PND2;E9PS42	P21291;E9PP21;E9PND2;E9PS42	Cysteine and glycine-rich protein 1	CSRP1	4
1.063	0.93424	10.07				3	4.9	98.398	8855900	3606500	5249400	22714000	9241100	13473000	237380000	10781000	226600000	P21399	P21399	Cytoplasmic aconitate hydratase	ACO1	1
2.1551	NaN	NaN				2	12	30.772	2414300	592870	1821400	0	0	0	0	0	0	P21796;C9JI87	P21796;C9JI87	Voltage-dependent anion-selective channel protein 1	VDAC1	2
1.5578	1.4086	1.4318				7	11.1	77.328	322980000	101640000	221340000	475020000	137520000	337500000	613330000	229810000	383520000	P21980;P21980-2	P21980	Protein-glutamine gamma-glutamyltransferase 2	TGM2	2
1.1816	1.0154	0.99713				2	3	117.85	10714000	4138500	6575900	29629000	11026000	18603000	28940000	11942000	16998000	P22314;P22314-2;Q5JRR6	P22314;P22314-2;Q5JRR6	Ubiquitin-like modifier-activating enzyme 1	UBA1	3
NaN	NaN	NaN				1	1.9	48.624	0	0	0	0	0	0	0	0	0	P22830-2;P22830	P22830-2;P22830	Ferrochelatase, mitochondrial	FECH	2
0.88773	0.90801	0.83768				8	41.7	23.742	40013000	18195000	21818000	63729000	22983000	40746000	31980000	15786000	16193000	P23284	P23284	Peptidyl-prolyl cis-trans isomerase B	PPIB	1
1.1153	0.92635	0.96407				4	10.2	47.716	120500000	51463000	69041000	161580000	65374000	96202000	87448000	41834000	45614000	P23526;P23526-2	P23526;P23526-2	Adenosylhomocysteinase	AHCY	2
0.86141	0.77412	0.8741				8	38.2	22.728	125680000	58679000	66999000	158270000	71884000	86387000	102820000	53217000	49600000	E9PK25;P23528;E9PP50;G3V1A4;E9PS23;E9PQB7;E9PLJ3	E9PK25;P23528;E9PP50;G3V1A4;E9PS23;E9PQB7;E9PLJ3	Cofilin-1	CFL1	7
1.1691	1.1051	1.4442				3	12.1	28.908	2374500	812150	1562400	4924400	1725000	3199400	7374800	2521400	4853400	P24539;Q5QNZ2	P24539;Q5QNZ2	ATP synthase subunit b, mitochondrial	ATP5F1	2
0.88807	0.92141	0.89919				4	7.8	67.819	72639000	32387000	40252000	76544000	31806000	44739000	194190000	98169000	96024000	P26038	P26038	Moesin	MSN	1
1.0714	1.051	1.0942				2	3	86.86	13840000	5599000	8240800	26137000	10294000	15843000	32417000	14934000	17483000	P26639-2;P26639;D6RDJ6;D6R9F8;D6RCA5;D6RCS6;D6RHV7;D6RJ97	P26639-2;P26639;D6RDJ6;D6R9F8;D6RCA5;D6RCS6;D6RHV7;D6RJ97	Threonine--tRNA ligase, cytoplasmic	TARS	8
NaN	1.0442	0.80325				3	6.6	56.149	0	0	0	12310000	4555200	7755100	882210	413890	468320	P26641-2;P26641	P26641-2;P26641	Elongation factor 1-gamma	EEF1G	2
0.88627	NaN	NaN				2	12.7	27.764	53223000	23896000	29327000	0	0	0	0	0	0	P27348;E9PG15	P27348;E9PG15	14-3-3 protein theta	YWHAQ	2
1.1128	1.0413	1.006				6	22.1	48.141	38273000	16029000	22244000	125560000	54613000	70951000	96559000	47381000	49178000	P27797;K7EJB9;K7EL50	P27797;K7EJB9	Calreticulin	CALR	3
1.0208	0.64695	1.0372				6	12.8	71.502	21374000	9322600	12051000	34705000	12589000	22116000	187230000	90337000	96894000	P27824-2;P27824;P27824-3;D6RGY2;H0Y9H1;H0Y9Q7;D6RFL1	P27824-2;P27824;P27824-3;D6RGY2	Calnexin	CANX	7
0.74121	NaN	1.0719				2	2.1	139.76	342160	162740	179420	0	0	0	853810	411110	442700	Q5VZU9;P29144	Q5VZU9;P29144	Tripeptidyl-peptidase 2	TPP2	2
NaN	1.7823	NaN				1	1	108.27	0	0	0	2029700	563960	1465700	0	0	0	P29317	P29317	Ephrin type-A receptor 2	EPHA2	1
NaN	NaN	NaN				1	2.5	161.63	0	0	0	0	0	0	0	0	0	P29400-2;P29400	P29400-2;P29400	Collagen alpha-5(IV) chain	COL4A5	2
0.85989	0.80724	0.85199				7	13.5	68.813	764110000	358420000	405690000	678630000	303770000	374860000	988830000	518180000	470650000	P29401-2;P29401;A0A0B4J1R6;E9PFF2;F8W888;F8WAX4	P29401-2;P29401;A0A0B4J1R6;E9PFF2	Transketolase	TKT	6
0.59862	0.62472	0.6505				5	30.4	31.554	6610700	3780800	2829900	10759000	5537400	5221400	19827000	11580000	8246500	P29966	P29966	Myristoylated alanine-rich C-kinase substrate	MARCKS	1
1.0911	0.74006	1.4237				1	4.6	28.993	8289400	3440900	4848400	15855000	5517100	10338000	487060	179740	307320	P30040;P30040-2	P30040;P30040-2	Endoplasmic reticulum resident protein 29	ERP29	2
1.3274	1.0429	1.0515				2	13.4	25.035	6059900	2037000	4022900	22735000	8607900	14127000	17236000	7027400	10208000	P30041	P30041	Peroxiredoxin-6	PRDX6	1
NaN	1.1367	1.1851				1	8.4	22.086	0	0	0	1009300	359200	650140	1501800	655260	846540	P30044;P30044-3;P30044-2	P30044;P30044-3;P30044-2	Peroxiredoxin-5, mitochondrial	PRDX5	3
1.4653	1.3789	1.286				2	7	27.692	35253000	11044000	24209000	31892000	8855200	23037000	48982000	17905000	31077000	P30048;P30048-2	P30048;P30048-2	Thioredoxin-dependent peroxide reductase, mitochondrial	PRDX3	2
1.079	NaN	NaN				1	5.5	17.818	477300	192820	284470	0	0	0	0	0	0	P30050	P30050	60S ribosomal protein L12	RPL12	1
NaN	1.5338	1.6176				2	7.9	31.387	0	0	0	14908000	4031700	10876000	10731000	3544000	7186500	P30084	P30084	Enoyl-CoA hydratase, mitochondrial	ECHS1	1
0.93549	0.91984	0.93285				5	35.3	21.057	32824000	14267000	18557000	98044000	39416000	58629000	101040000	46817000	54219000	P30086	P30086	Phosphatidylethanolamine-binding protein 1;Hippocampal cholinergic neurostimulating peptide	PEBP1	1
1.1008	1.0588	1.1149				4	10.9	56.782	168460000	70694000	97770000	222760000	88075000	134690000	199200000	90020000	109180000	P30101;H7BZJ3	P30101	Protein disulfide-isomerase A3	PDIA3	2
NaN	NaN	NaN				2	6.2	57.206	0	0	0	0	0	0	0	0	0	P30837	P30837	Aldehyde dehydrogenase X, mitochondrial	ALDH1B1	1
NaN	NaN	NaN				1	4.3	50.582	0	0	0	0	0	0	0	0	0	P31150	P31150	Rab GDP dissociation inhibitor alpha	GDI1	1
0.90089	0.825	0.92765				2	5.3	44.868	88851000	40940000	47912000	85486000	38327000	47159000	98364000	49233000	49131000	P31689;P31689-2	P31689;P31689-2	DnaJ homolog subfamily A member 1	DNAJA1	2
1.99	1.5125	NaN				3	15.5	35.329	5621000	1796400	3824600	18828000	5121900	13706000	0	0	0	P31937;H7BZL2	P31937	3-hydroxyisobutyrate dehydrogenase, mitochondrial	HIBADH	2
1.0201	0.98928	0.91266				5	9.6	64.615	34081000	13804000	20276000	37433000	12972000	24462000	48294000	21494000	26800000	P31939;P31939-2;H7C1S2;F8WEF0	P31939;P31939-2;H7C1S2	Bifunctional purine biosynthesis protein PURH;Phosphoribosylaminoimidazolecarboxamide formyltransferase;IMP cyclohydrolase	ATIC	4
0.9071	0.88299	0.87068				1	23.6	28.082	53251000	23617000	29634000	97240000	40621000	56618000	30871000	14320000	16550000	P31946;A0A0J9YWE8;Q4VY19;Q4VY20	P31946;A0A0J9YWE8;Q4VY19;Q4VY20	14-3-3 protein beta/alpha;14-3-3 protein beta/alpha, N-terminally processed	YWHAB	4
0.81001	0.88708	0.89276				1	23	27.85	24171000	9821100	14350000	14981000	5567400	9413100	23683000	11132000	12551000	P31946-2	P31946-2			1
1.3077	1.0292	0.98738				6	11.7	68.08	1150500	297540	852990	7141300	2614600	4526800	366550	201370	165180	P31948-2;P31948;P31948-3;F5H783;F5GXD8	P31948-2;P31948;P31948-3;F5H783	Stress-induced-phosphoprotein 1	STIP1	5
NaN	NaN	NaN	+			1	4.4	37.734	0	0	0	569730	0	569730	0	0	0	P32314-2	P32314-2			1
1.0886	1.2474	1.1509				3	4.2	109.68	6961400	2728700	4232700	7816700	2651500	5165200	17449000	7667400	9781900	P33176;Q12840;O60282;J3KNA1;A0A0G2JMZ6;O60282-2	P33176;Q12840;O60282;J3KNA1;A0A0G2JMZ6	Kinesin-1 heavy chain;Kinesin heavy chain isoform 5A;Kinesin heavy chain isoform 5C	KIF5B;KIF5A;KIF5C	6
NaN	NaN	NaN				1	1.9	81.307	0	0	0	0	0	0	0	0	0	P33993;P33993-3	P33993;P33993-3	DNA replication licensing factor MCM7	MCM7	2
1.0927	1.0319	1.0833				10	15.2	94.33	38534000	15121000	23413000	87413000	33306000	54106000	107350000	48216000	59131000	P34932;A0A087WYC1;A0A087WTS8;P34932-2	P34932;A0A087WYC1	Heat shock 70 kDa protein 4	HSPA4	4
1.0016	0.82837	1.0237				5	7.8	71.048	9745700	4620700	5125000	39635000	16737000	22898000	61284000	30773000	30511000	P35241-5;P35241;P35241-4;P35241-2;P35241-3	P35241-5;P35241;P35241-4;P35241-2;P35241-3	Radixin	RDX	5
NaN	0.87096	NaN				2	7.3	28.048	0	0	0	14181000	6595600	7585400	0	0	0	P35270	P35270	Sepiapterin reductase	SPR	1
0.74052	0.70702	0.70387				22	13.9	226.53	635800000	329420000	306380000	1015100000	505280000	509810000	1258700000	694430000	564270000	P35579;P35579-2;Q5BKV1;B1AH99;A1L2Z2;A0A0C4DFM8	P35579;P35579-2	Myosin-9	MYH9	6
NaN	0.91299	0.78657				3	3.7	232.53	0	0	0	20211000	8148200	12063000	22631000	11597000	11035000	P35580-4;P35580-3;P35580-2;P35580-5;P35580	P35580-4;P35580-3;P35580-2;P35580-5;P35580	Myosin-10	MYH10	5
1.1703	1.5881	NaN				3	5.2	102.49	352050	128540	223510	362930	88002	274930	0	0	0	P35606;P35606-2	P35606;P35606-2	Coatomer subunit beta	COPB2	2
NaN	NaN	NaN				1	0.8	215.4	0	0	0	0	0	0	0	0	0	P35658-5;P35658-3;P35658;P35658-4;P35658-2	P35658-5;P35658-3;P35658;P35658-4;P35658-2	Nuclear pore complex protein Nup214	NUP214	5
NaN	NaN	0.68162				1	2.1	228.09	0	0	0	0	0	0	5620500	3194000	2426500	P35749-2;P35749;P35749-3;P35749-4	P35749-2;P35749;P35749-3;P35749-4	Myosin-11	MYH11	4
NaN	1.2659	NaN				1	4.3	34.36	0	0	0	554390	153190	401190	0	0	0	P35914;P35914-2;P35914-3	P35914;P35914-2;P35914-3	Hydroxymethylglutaryl-CoA lyase, mitochondrial	HMGCL	3
NaN	NaN	1.1322				1	6.6	20.455	0	0	0	0	0	0	971380	396820	574560	P36405	P36405	ADP-ribosylation factor-like protein 3	ARL3	1
1.7234	1.0382	0.87761				2	3.6	63.79	4408200	1240700	3167600	13170000	6882200	6287600	44459000	10166000	34293000	P36871-2;P36871;P36871-3	P36871-2;P36871;P36871-3	Phosphoglucomutase-1	PGM1	3
NaN	NaN	2.5912				1	2	48.755	0	0	0	0	0	0	7684600	2183200	5501400	P36957;P36957-2;Q86SW4	P36957;P36957-2;Q86SW4	Dihydrolipoyllysine-residue succinyltransferase component of 2-oxoglutarate dehydrogenase complex, mitochondrial	DLST	3
0.95771	0.88502	1.0817				1	4.1	24.454	80712000	33412000	47299000	148630000	60602000	88024000	76957000	34918000	42039000	P37802-2;P37802;X6RJP6	P37802-2;P37802;X6RJP6	Transgelin-2	TAGLN2	3
1.674	1.6457	1.6974				2	5.2	37.434	53259000	15424000	37835000	89716000	24007000	65709000	38287000	13435000	24852000	P38117-2;P38117	P38117-2;P38117	Electron transfer flavoprotein subunit beta	ETFB	2
2.0719	1.869	2.2427				5	9.9	73.68	52341000	13054000	39287000	31093000	7642100	23451000	91783000	30061000	61722000	P38646	P38646	Stress-70 protein, mitochondrial	HSPA9	1
NaN	NaN	NaN				1	3.2	46.871	0	0	0	0	0	0	0	0	0	P38919	P38919	Eukaryotic initiation factor 4A-III	EIF4A3	1
NaN	1.1003	1.3498				2	6.9	38.498	0	0	0	4203700	1475800	2727900	3486900	1399200	2087700	P40121;P40121-2;E7ENU9	P40121;P40121-2;E7ENU9	Macrophage-capping protein	CAPG	3
1.0943	0.91684	1.4315				1	4.9	58.024	142170000	58378000	83795000	4932700	2008400	2924300	8865700	3506500	5359100	P40227;P40227-2	P40227;P40227-2	T-complex protein 1 subunit zeta	CCT6A	2
1.0539	0.9164	0.93312				4	16.3	29.574	68041000	27103000	40938000	74122000	28484000	45638000	48214000	22980000	25234000	P40261	P40261	Nicotinamide N-methyltransferase	NNMT	1
1.0667	0.96281	1.0742				5	19.6	38.627	124470000	54507000	69962000	50061000	21452000	28609000	63787000	29014000	34774000	P40925-3;P40925;P40925-2;C9JF79;B9A041;B8ZZ51;C9JRL4;C9JLV6	P40925-3;P40925;P40925-2;C9JF79;B9A041;B8ZZ51	Malate dehydrogenase, cytoplasmic;Malate dehydrogenase	MDH1	8
2.0307	1.7255	1.9074				5	21	35.503	98972000	28490000	70482000	69051000	19254000	49797000	100900000	30788000	70112000	P40926;P40926-2;G3XAL0	P40926;P40926-2;G3XAL0	Malate dehydrogenase, mitochondrial;Malate dehydrogenase	MDH2	3
1.2765	0.94656	1.3016				5	10.5	82.999	3305400	1194200	2111200	647100	315540	331560	7867600	2796800	5070800	P40939;H0YFD6	P40939	Trifunctional enzyme subunit alpha, mitochondrial;Long-chain enoyl-CoA hydratase;Long chain 3-hydroxyacyl-CoA dehydrogenase	HADHA	2
NaN	1.253	1.384				2	5.9	51.109	0	0	0	36488000	11297000	25191000	24660000	9264400	15395000	P41091;Q2VIR3	P41091;Q2VIR3	Eukaryotic translation initiation factor 2 subunit 3;Putative eukaryotic translation initiation factor 2 subunit 3-like protein	EIF2S3;EIF2S3L	2
NaN	NaN	0.95049				1	7	19.738	0	0	0	0	0	0	154230	74193	80039	P41208	P41208	Centrin-2	CETN2	1
0.66597	NaN	NaN	+			1	1.5	64.706	7108600	3614700	3493900	0	0	0	0	0	0	P41214;P41214-2;Q5SY38	P41214;P41214-2;Q5SY38	Eukaryotic translation initiation factor 2D	EIF2D;LGTN	3
1.7714	NaN	1.6546				1	1.5	83.165	6285900	1753000	4532800	0	0	0	15622000	3990800	11631000	P41250	P41250	Glycine--tRNA ligase	GARS	1
NaN	NaN	NaN				1	4.8	42.293	0	0	0	0	0	0	0	0	0	P42025	P42025	Beta-centractin	ACTR1B	1
NaN	NaN	NaN				1	7.8	23.364	0	0	0	0	0	0	0	0	0	P42330-2	P42330-2			1
1.9819	2.4165	1.6692				7	6.1	157.9	24776000	7289700	17486000	37799000	9115300	28683000	62202000	25173000	37029000	P42704	P42704	Leucine-rich PPR motif-containing protein, mitochondrial	LRPPRC	1
1.0668	1.0761	0.95145				9	24.6	55.52	113770000	44680000	69092000	134820000	50908000	83908000	105430000	51839000	53587000	P43490;A0A0C4DFS8	P43490;A0A0C4DFS8	Nicotinamide phosphoribosyltransferase	NAMPT	2
NaN	1.5487	1.3418				1	3	47.485	0	0	0	1934600	541280	1393300	1872300	731100	1141200	P45954;P45954-2	P45954;P45954-2	Short/branched chain specific acyl-CoA dehydrogenase, mitochondrial	ACADSB	2
NaN	NaN	NaN				1	6.8	22.225	0	0	0	0	0	0	0	0	0	P45973	P45973	Chromobox protein homolog 5	CBX5	1
0.82649	NaN	0.80309				2	5.4	95.785	2668600	1294400	1374200	0	0	0	17736000	9666300	8069300	P45974;P45974-2	P45974;P45974-2	Ubiquitin carboxyl-terminal hydrolase 5	USP5	2
1.1665	0.95517	1.1614				3	8.1	34.362	8007200	3086800	4920500	8082900	3377300	4705600	2912300	1325200	1587100	P46777	P46777	60S ribosomal protein L5	RPL5	1
0.91131	0.9012	0.81427				9	4.9	270.63	16860000	6612400	10248000	25914000	10838000	15076000	32700000	16270000	16431000	P46821;D6RA32;D6RA40	P46821	Microtubule-associated protein 1B;MAP1 light chain LC1	MAP1B	3
NaN	NaN	NaN				1	0.3	394.96	0	0	0	0	0	0	0	0	0	P46939-2;P46939	P46939-2;P46939	Utrophin	UTRN	2
1.1125	1.1471	1.0616				13	9.6	189.25	127330000	52614000	74721000	119470000	44909000	74556000	122280000	52451000	69833000	P46940;A0A0J9YXZ5;H0YLE8;Q13576;F5H7S7;E7EWC2;Q13576-2;Q13576-3;E9PDT6;H0YKA5	P46940;A0A0J9YXZ5;H0YLE8	Ras GTPase-activating-like protein IQGAP1	IQGAP1	10
NaN	1.0306	NaN				1	5.2	32.949	0	0	0	2050800	841720	1209100	0	0	0	P47755	P47755	F-actin-capping protein subunit alpha-2	CAPZA2	1
1.0225	0.98257	1.0407				1	9.4	17.752	51527000	20642000	30885000	54415000	20402000	34014000	44062000	19478000	24584000	P47914	P47914	60S ribosomal protein L29	RPL29	1
0.94493	0.8865	0.83628				1	1.9	64.149	5852800	2661000	3191800	5741500	2546100	3195400	12105000	6319800	5785500	P48163;P48163-2	P48163;P48163-2	NADP-dependent malic enzyme	ME1	2
NaN	1.3754	NaN				1	3.6	30.727	0	0	0	349820	115000	234820	0	0	0	P48507;P48507-2	P48507;P48507-2	Glutamate--cysteine ligase regulatory subunit	GCLM	2
NaN	1.4176	NaN				1	2.9	50.909	0	0	0	1515100	409580	1105500	0	0	0	P48735;P48735-2	P48735;P48735-2	Isocitrate dehydrogenase [NADP], mitochondrial	IDH2	2
NaN	NaN	0.51363				1	6.7	19.529	0	0	0	0	0	0	318400	198610	119790	P49006	P49006	MARCKS-related protein	MARCKSL1	1
0.69007	0.98499	1.1428				2	4.8	60.533	6587800	2118700	4469000	8805300	3497300	5308100	30785000	12599000	18185000	P49368;P49368-2;B4DUR8;E9PRC8;Q5SZX9;E9PM09	P49368;P49368-2;B4DUR8;E9PRC8;Q5SZX9;E9PM09	T-complex protein 1 subunit gamma	CCT3	6
NaN	NaN	2.0715				2	4.9	49.541	0	0	0	0	0	0	3284700	1077100	2207600	P49411	P49411	Elongation factor Tu, mitochondrial	TUFM	1
2.3115	1.8651	1.6872				6	6.7	106.81	8356800	2158000	6198800	19541000	5312500	14228000	27899000	9958000	17941000	P49588;P49588-2;H3BPK7	P49588;P49588-2;H3BPK7	Alanine--tRNA ligase, cytoplasmic	AARS	3
1.7242	1.5879	2.2101				7	13.7	72.926	61423000	18376000	43047000	57236000	16085000	41151000	120680000	39926000	80758000	P49748-3;P49748;P49748-2;K7EQP4;K7EJW8;J3QKU9;G3V1M7;J3KSR4;J3KS89	P49748-3;P49748;P49748-2;K7EQP4	Very long-chain specific acyl-CoA dehydrogenase, mitochondrial	ACADVL	9
1.0926	1.2319	1.6843				2	1.3	241.64	1311200	454370	856840	2524300	972620	1551700	459130	179830	279300	P49750-4;P49750;P49750-3;H0YIQ2;F8VU51	P49750-4;P49750;P49750-3;H0YIQ2;F8VU51	YLP motif-containing protein 1	YLPM1	5
NaN	2.0744	NaN				1	1.7	100.18	0	0	0	1058400	264290	794100	0	0	0	P49756	P49756	RNA-binding protein 25	RBM25	1
1.2837	NaN	1.2338				3	2.1	358.2	331210	110950	220260	0	0	0	619090	257160	361930	P49792;O14715;Q99666;J3KNE0;A6NKT7;Q7Z3J3;J3KQ37;H7BZ48	P49792	E3 SUMO-protein ligase RanBP2;Putative peptidyl-prolyl cis-trans isomerase	RANBP2	8
1.0564	1.0956	1.3834				2	4.5	50.663	35083000	15153000	19929000	8875000	3536800	5338200	23615000	10621000	12994000	P50395;P50395-2;Q5SX87;Q5SX86;Q5SX90;V9GYF8;V9GYJ7	P50395;P50395-2;Q5SX87;Q5SX86;Q5SX90;V9GYF8;V9GYJ7	Rab GDP dissociation inhibitor beta	GDI2	7
1.0358	0.44216	0.96207				1	8.9	46.44	17438000	7850000	9587900	7598800	3192600	4406200	15238000	7883300	7354500	P50454;E9PPV6;E9PR70;E9PMI5;E9PK86;E9PNX1;E9PRS3;E9PIG2;E9PJH8;E9PQ34	P50454;E9PPV6;E9PR70	Serpin H1	SERPINH1	10
NaN	NaN	3.4291				1	1.7	98.063	0	0	0	0	0	0	16164000	2991700	13172000	P50570;P50570-4;P50570-5;P50570-2;P50570-3	P50570;P50570-4;P50570-5;P50570-2;P50570-3	Dynamin-2	DNM2	5
1.2182	1.2723	1.0507				3	5.7	59.62	14634000	6137000	8496600	24511000	9348000	15163000	23595000	10606000	12989000	P50990;P50990-2;P50990-3;H7C4C8	P50990;P50990-2;P50990-3;H7C4C8	T-complex protein 1 subunit theta	CCT8	4
0.80067	2.2504	NaN				2	7.8	57.924	4740500	2655500	2085000	1961300	469670	1491600	0	0	0	P50991;P50991-2	P50991;P50991-2	T-complex protein 1 subunit delta	CCT4	2
0.84099	0.82294	0.82459				1	2.2	54.389	6205900	2915800	3290100	16058000	7675400	8382900	11387000	6391500	4995400	P50995;P50995-2	P50995;P50995-2	Annexin A11	ANXA11	2
0.82543	0.87002	0.78687				3	7.3	34.752	14491000	6492900	7998100	71335000	29923000	41413000	25110000	12132000	12977000	P51572-2;P51572;C9J0M4;C9JQ75;C9JSP1;C9JMD7	P51572-2;P51572	B-cell receptor-associated protein 31	BCAP31	6
0.47831	0.90701	NaN				1	5.7	28.18	1598100	842350	755760	4427800	2097300	2330500	0	0	0	P51580	P51580	Thiopurine S-methyltransferase	TPMT	1
NaN	NaN	1.075				1	4.6	30.216	0	0	0	0	0	0	482430	194400	288030	P51809-2;P51809;P51809-3	P51809-2;P51809;P51809-3	Vesicle-associated membrane protein 7	VAMP7	3
1.0639	NaN	1.05				2	8.2	28.264	6329700	2422400	3907300	0	0	0	3338800	1685300	1653500	P51858-3;P51858;P51858-2	P51858-3;P51858;P51858-2	Hepatoma-derived growth factor	HDGF	3
1.2744	1.1721	1.1982				7	17.4	53.139	1375200000	511350000	863840000	936670000	334810000	601860000	977900000	419580000	558320000	P52209;P52209-2;K7EPF6;K7EM49;K7EMN2;K7ELN9	P52209;P52209-2;K7EPF6;K7EM49;K7EMN2	6-phosphogluconate dehydrogenase, decarboxylating	PGD	6
2.3326	1.346	1.6294				1	3.3	60.766	1858300	394530	1463800	6054900	2157500	3897400	4846700	1558200	3288500	P52594-4;P52594;P52594-3;P52594-2	P52594-4;P52594;P52594-3;P52594-2	Arf-GAP domain and FG repeat-containing protein 1	AGFG1	4
0.902	0.70979	1.108				1	5.2	32.922	9383300	4169400	5213900	10822000	4252100	6569700	9932600	4410500	5522100	P52907	P52907	F-actin-capping protein subunit alpha-1	CAPZA1	1
0.96838	NaN	1.308				2	8.1	33.428	3525700	1582000	1943700	0	0	0	9503800	3822600	5681300	P53004	P53004	Biliverdin reductase A	BLVRA	1
0.87865	0.92111	0.74565				6	5.9	120.84	54513000	24580000	29933000	41170000	17984000	23186000	77755000	40812000	36943000	P53396;P53396-2;P53396-3;K7ESG8	P53396;P53396-2;P53396-3	ATP-citrate synthase	ACLY	4
NaN	1.1688	1.2067				2	3.8	107.14	0	0	0	5652100	1766500	3885700	5419900	2214300	3205600	P53618;E9PP73	P53618;E9PP73	Coatomer subunit beta	COPB1	2
NaN	1.0745	NaN				1	1.1	139.32	0	0	0	1399200	565240	833940	0	0	0	P53621-2;P53621	P53621-2;P53621	Coatomer subunit alpha;Xenin;Proxenin	COPA	2
NaN	1.4331	0.92406				2	6.6	53.944	0	0	0	1388900	465840	923050	1159900	482100	677780	P53985	P53985	Monocarboxylate transporter 1	SLC16A1	1
NaN	NaN	NaN				1	5	41.565	0	0	0	0	0	0	0	0	0	P53990-5;P53990-4;P53990;P53990-2;P53990-6	P53990-5;P53990-4;P53990;P53990-2;P53990-6	IST1 homolog	IST1	5
NaN	NaN	0.91105				1	10.2	14.395	0	0	0	0	0	0	554950	281760	273190	P53999	P53999	Activated RNA polymerase II transcriptional coactivator p15	SUB1	1
1.583	1.1716	1.0404				2	5.5	75.378	1854000	738690	1115300	368810	176870	191930	15466000	7008500	8457500	P54136;P54136-2;E5RJM9	P54136;P54136-2;E5RJM9	Arginine--tRNA ligase, cytoplasmic	RARS	3
0.82051	0.90831	0.84323				3	9.2	70.02	47306000	21565000	25741000	18882000	7337800	11544000	54208000	26463000	27745000	P54652	P54652	Heat shock-related 70 kDa protein 2	HSPA2	1
NaN	NaN	NaN				1	1.6	87.301	0	0	0	0	0	0	0	0	0	P54886;P54886-2	P54886;P54886-2	Delta-1-pyrroline-5-carboxylate synthase;Glutamate 5-kinase;Gamma-glutamyl phosphate reductase	ALDH18A1	2
NaN	2.0456	1.2324				4	13.5	49.222	0	0	0	1106000	504730	601250	3325900	1393900	1932000	P55010;H0YN40;H0YLZ1;H0YM54;H0YMJ8;H0YK11	P55010;H0YN40;H0YLZ1	Eukaryotic translation initiation factor 5	EIF5	6
1.0725	0.97278	1.0381				6	7.5	110.42	23824000	9724700	14099000	35610000	13889000	21721000	38286000	18255000	20030000	P55060;P55060-3;P55060-4	P55060;P55060-3;P55060-4	Exportin-2	CSE1L	3
0.74961	1.0083	0.96044				6	9.9	89.321	108360000	47354000	61011000	194210000	84860000	109350000	111140000	52219000	58921000	P55072	P55072	Transitional endoplasmic reticulum ATPase	VCP	1
1.0333	1.0243	0.89495				1	2.8	40.545	1012700	445250	567450	958410	385330	573080	1435200	720750	714410	P55263;P55263-3	P55263;P55263-3	Adenosine kinase	ADK	2
0.75121	NaN	NaN				1	1.1	99.028	835320	368350	466970	0	0	0	0	0	0	P55884-2;P55884	P55884-2;P55884	Eukaryotic translation initiation factor 3 subunit B	EIF3B	2
1.3227	1.5134	1.2967				2	2.2	101.11	4067400	1399200	2668200	27232000	7388000	19844000	11799000	4602700	7196600	P56192;P56192-2;H0YIP0	P56192;P56192-2;H0YIP0	Methionine--tRNA ligase, cytoplasmic	MARS	3
NaN	NaN	NaN				1	2.7	45.489	0	0	0	0	0	0	0	0	0	P57081;P57081-2;P57081-3	P57081;P57081-2;P57081-3	tRNA (guanine-N(7)-)-methyltransferase subunit WDR4	WDR4	3
NaN	NaN	NaN				1	2.9	38.828	0	0	0	0	0	0	0	0	0	P57682;P57682-2	P57682;P57682-2	Krueppel-like factor 3	KLF3	2
NaN	NaN	NaN				1	4.7	36.336	0	0	0	0	0	0	0	0	0	P59551	P59551	Taste receptor type 2 member 60	TAS2R60	1
1.0461	0.99656	1.0329				6	25.5	30.791	425570000	170150000	255430000	667450000	255890000	411560000	615330000	272730000	342610000	P60174;P60174-1;P60174-4;U3KPZ0;U3KQF3	P60174;P60174-1;P60174-4;U3KPZ0	Triosephosphate isomerase	TPI1	5
0.84708	0.90146	0.80122				2	11	21.258	15998000	6899500	9098100	33253000	12827000	20426000	29381000	13269000	16112000	P60953;P60953-1	P60953;P60953-1	Cell division control protein 42 homolog	CDC42	2
NaN	1.0418	0.95138				1	12.1	23.668	0	0	0	485660	168570	317090	577410	264010	313400	P61006	P61006	Ras-related protein Rab-8A	RAB8A	1
NaN	NaN	0.92831				1	6.7	20.313	0	0	0	0	0	0	1072300	499930	572420	P61009	P61009	Signal peptidase complex subunit 3	SPCS3	1
1.3483	1.3046	1.3306				2	11.8	23.545	15755000	5626700	10128000	16564000	4943500	11620000	8576300	3436200	5140100	P61019;Q8WUD1;Q5HYI5;P61019-2;E9PKL7;H0YD31;H7C125;E9PE37	P61019;Q8WUD1;Q5HYI5;P61019-2;E9PKL7;H0YD31;H7C125;E9PE37	Ras-related protein Rab-2A;Ras-related protein Rab-2B	RAB2A;RAB2B;DKFZp313C1541	8
0.56868	0.84669	0.69177				2	18.5	22.541	5450500	2415800	3034700	4691500	1925400	2766100	4188100	2172100	2016100	P61026	P61026	Ras-related protein Rab-10	RAB10	1
1.7761	1.1427	1.4519				3	16.9	20.9	16501000	6151000	10350000	13542000	4841900	8700600	7365600	3016400	4349200	P61081;M0QYI6	P61081;M0QYI6	NEDD8-conjugating enzyme Ubc12	UBE2M	2
1.0863	NaN	NaN				1	6.5	23.897	1939300	559420	1379900	0	0	0	0	0	0	P61106;X6RFL8	P61106;X6RFL8	Ras-related protein Rab-14	RAB14	2
NaN	0.99129	0.96169				2	13.1	17.258	0	0	0	4498100	1824000	2674100	6421200	2947800	3473400	P61254;Q9UNX3;J3QRC4;E5RIT6;J3QQV1;J3QQQ9;J3QRI7;J3KTJ8;J3KSS0;E5RHH1	P61254;Q9UNX3;J3QRC4;E5RIT6;J3QQV1;J3QQQ9;J3QRI7;J3KTJ8;J3KSS0;E5RHH1	60S ribosomal protein L26;60S ribosomal protein L26-like 1	RPL26;RPL26L1	10
1.0529	1.0704	1.063				3	7.3	51.028	9562500	3931000	5631500	43161000	16572000	26589000	48104000	21233000	26871000	P61978-2;P61978;P61978-3;Q5T6W2;S4R359;S4R457	P61978-2;P61978;P61978-3;Q5T6W2	Heterogeneous nuclear ribonucleoprotein K	HNRNPK	6
1.3472	1.753	1.1972				2	8.1	28.302	3721800	1210600	2511200	5466800	1600200	3866600	2094000	821740	1272200	P61981	P61981	14-3-3 protein gamma;14-3-3 protein gamma, N-terminally processed	YWHAG	1
1.1299	0.91248	1.1179				3	10.8	22.127	16152000	5915300	10237000	39780000	13920000	25860000	25667000	10934000	14733000	P62081	P62081	40S ribosomal protein S7	RPS7	1
1.0311	1.0365	1.102				3	16.8	24.205	113690000	45883000	67804000	75663000	28375000	47288000	34588000	14811000	19777000	P62241;Q5JR95	P62241;Q5JR95	40S ribosomal protein S8	RPS8	2
1.1734	1.2015	1.1179				6	29.4	29.174	489880000	180580000	309290000	675990000	240230000	435760000	391740000	165100000	226640000	P62258;P62258-2;I3L3T1;B4DJF2;I3L0W5;K7EM20;K7EIT4	P62258;P62258-2	14-3-3 protein epsilon	YWHAE	7
NaN	NaN	NaN				1	7.7	15.807	0	0	0	0	0	0	0	0	0	P62266	P62266	40S ribosomal protein S23	RPS23	1
NaN	NaN	NaN				1	7.3	17.222	0	0	0	0	0	0	0	0	0	P62277	P62277	40S ribosomal protein S13	RPS13	1
3.1221	1.1241	1.1198				1	6.3	20.082	2662600	904360	1758200	1775000	628100	1146800	1914200	851860	1062300	P62330	P62330	ADP-ribosylation factor 6	ARF6	1
NaN	NaN	NaN				1	5.6	29.995	0	0	0	0	0	0	0	0	0	P62424;Q5T8U2	P62424;Q5T8U2	60S ribosomal protein L7a	RPL7A	2
1.0471	1.1168	0.96723				2	7.6	28.68	7007400	2938000	4069400	43776	15922	27854	3704000	1853400	1850500	P62753;A2A3R5;A2A3R7	P62753;A2A3R5;A2A3R7	40S ribosomal protein S6	RPS6	3
NaN	0.9873	0.97332				1	7.2	13.742	0	0	0	1978400	764910	1213500	2881700	1337800	1544000	P62851	P62851	40S ribosomal protein S25	RPS25	1
NaN	NaN	0.90966				2	17.6	12.274	0	0	0	0	0	0	774050	362420	411630	P62877	P62877	E3 ubiquitin-protein ligase RBX1	RBX1	1
NaN	1.2506	NaN				1	7.4	24.831	0	0	0	5279100	1611600	3667500	0	0	0	P62906	P62906	60S ribosomal protein L10a	RPL10A	1
1.0384	0.98961	1.0372				2	12.9	20.252	12561000	5258300	7302900	77146000	30716000	46430000	13763000	6497700	7265200	P62913;P62913-2;Q5VVC8;Q5VVC9	P62913;P62913-2;Q5VVC8;Q5VVC9	60S ribosomal protein L11	RPL11	4
NaN	0.99511	0.99597				4	16.4	18.012	0	0	0	2777600	1240700	1536900	29360000	13257000	16103000	P62937;P62937-2;A0A075B759;A0A075B767;A0A0B4J2A2;A0A0H2UH34;F5H284;P0DN26;P0DN37;Q9Y536;C9J5S7;F8WE65	P62937;P62937-2	Peptidyl-prolyl cis-trans isomerase A	PPIA	12
NaN	0.83407	1.0437				2	12.3	23.467	0	0	0	3818600	1758800	2059700	2293700	892180	1401500	P63000-2;P63000;P15153;B1AH80;B1AH78;B1AH77	P63000-2;P63000;P15153;B1AH80;B1AH78;B1AH77	Ras-related C3 botulinum toxin substrate 1;Ras-related C3 botulinum toxin substrate 2	RAC1;RAC2	6
1.0266	0.99388	0.70632				3	15.9	28.036	505420000	199170000	306250000	1080500000	410020000	670500000	391060000	174050000	217010000	E7EX29;P63104;P63104-2;B0AZS6;E7ESK7;H0YB80;B7Z2E6;E7EVZ2;E9PD24;E5RIR4;E5RGE1	E7EX29;P63104;P63104-2;B0AZS6;E7ESK7	14-3-3 protein zeta/delta	YWHAZ	11
0.57259	0.77315	0.86905				1	24.3	41.792	3101700	1784000	1317800	12295000	5585300	6710100	1318900	695130	623780	P63261;I3L4N8;I3L1U9;I3L3I0;J3KT65;I3L3R2;K7EM38	P63261	Actin, cytoplasmic 2;Actin, cytoplasmic 2, N-terminally processed	ACTG1	7
0.8684	0.7508	1.0059				1	9.7	49.83	2077500	939830	1137700	3721400	1874600	1846800	8574300	4020200	4554000	P68371;Q13885;Q9BVA1	P68371;Q13885;Q9BVA1	Tubulin beta-4B chain;Tubulin beta-2A chain;Tubulin beta-2B chain	TUBB4B;TUBB2A;TUBB2B	3
NaN	1.1557	NaN				1	1.7	112.42	0	0	0	648340	265990	382360	0	0	0	P78347;P78347-3;P78347-4;P78347-2	P78347;P78347-3;P78347-4;P78347-2	General transcription factor II-I	GTF2I	4
0.94342	1.0153	1.0128				2	7.5	27.566	20182000	8698900	11483000	25869000	10268000	15601000	14332000	6788400	7543100	P78417;P78417-3;P78417-2;Q5TA02;Q5TA01	P78417;P78417-3;P78417-2;Q5TA02;Q5TA01	Glutathione S-transferase omega-1	GSTO1	5
1.1142	1.1667	0.91938				7	2.2	469.08	22886000	7940300	14946000	16749000	6475700	10273000	42739000	19235000	23504000	P78527;P78527-2	P78527;P78527-2	DNA-dependent protein kinase catalytic subunit	PRKDC	2
NaN	NaN	NaN				1	7.5	22.788	0	0	0	0	0	0	0	0	0	X6R8F3;P80188;P80188-2	X6R8F3;P80188;P80188-2	Neutrophil gelatinase-associated lipocalin	LCN2	3
1.1202	1.09	1.1549				10	75.8	22.693	94996000	37628000	57368000	120200000	47991000	72210000	151760000	65862000	85902000	P80723;P80723-2;U3KQP0	P80723;P80723-2	Brain acid soluble protein 1	BASP1	3
NaN	NaN	NaN				1	4	36.844	0	0	0	0	0	0	0	0	0	P82673	P82673	28S ribosomal protein S35, mitochondrial	MRPS35	1
1.2224	NaN	NaN				1	2.8	48.08	267910	108980	158920	0	0	0	0	0	0	P84022	P84022	Mothers against decapentaplegic homolog 3	SMAD3	1
NaN	NaN	NaN				1	8.9	21.308	0	0	0	0	0	0	0	0	0	P84095	P84095	Rho-related GTP-binding protein RhoG	RHOG	1
NaN	NaN	NaN				1	2.8	56.684	0	0	0	0	0	0	0	0	0	P98170	P98170	E3 ubiquitin-protein ligase XIAP	XIAP	1
0.99143	1.1166	1.1968				3	12.9	25.177	20253000	8296800	11956000	61704000	23618000	38086000	24448000	10779000	13669000	Q00688	Q00688	Peptidyl-prolyl cis-trans isomerase FKBP3	FKBP3	1
1.5365	0.92362	0.92784				3	15.3	21.493	9377000	3048100	6328900	26256000	10492000	15765000	17566000	7803300	9762600	Q00765;E2QRG8;H0Y8J8;Q00765-2;B7Z510;B7Z332	Q00765	Receptor expression-enhancing protein 5	REEP5	6
1.3932	1.2948	1.3338				8	7.9	90.583	4775800	1722900	3053000	13705000	4768200	8936400	27532000	11980000	15552000	Q00839;Q00839-2;Q5RI18	Q00839;Q00839-2	Heterogeneous nuclear ribonucleoprotein U	HNRNPU	3
NaN	NaN	NaN				1	2.1	51.901	0	0	0	0	0	0	0	0	0	Q01518;Q01518-2	Q01518;Q01518-2	Adenylyl cyclase-associated protein 1	CAP1	2
NaN	NaN	NaN				1	3.2	55.01	0	0	0	0	0	0	0	0	0	Q01650	Q01650	Large neutral amino acids transporter small subunit 1	SLC7A5	1
NaN	0.94884	1.2345				1	1.3	85.595	0	0	0	79394000	31826000	47567000	56782000	24637000	32145000	Q01813	Q01813	6-phosphofructokinase type C	PFKP	1
1.4049	1.3519	1.2315				5	14.2	51.804	7041900	2210500	4831400	32542000	10813000	21728000	4012100	1663900	2348200	Q02790;H0YFG2;F5H120	Q02790	Peptidyl-prolyl cis-trans isomerase FKBP4;Peptidyl-prolyl cis-trans isomerase FKBP4, N-terminally processed	FKBP4	3
NaN	NaN	NaN				1	1.6	88.271	0	0	0	0	0	0	0	0	0	Q02809-2;Q02809	Q02809-2;Q02809	Procollagen-lysine,2-oxoglutarate 5-dioxygenase 1	PLOD1	2
1.0283	0.89935	1.179				2	7.6	32.728	108740000	44448000	64290000	109060000	42461000	66602000	78417000	34578000	43839000	Q02878;U3KQR5;F8VZ45;F8VU16;F8VWR1;F8VZA3	Q02878;U3KQR5;F8VZ45;F8VU16;F8VWR1;F8VZA3	60S ribosomal protein L6	RPL6	6
NaN	NaN	NaN				1	0.8	191.48	0	0	0	0	0	0	0	0	0	Q02952;Q02952-2;Q02952-3	Q02952;Q02952-2;Q02952-3	A-kinase anchor protein 12	AKAP12	3
NaN	1.1655	NaN				1	4.3	20.777	0	0	0	16507000	6142700	10364000	0	0	0	Q04760;Q04760-2	Q04760;Q04760-2	Lactoylglutathione lyase	GLO1	2
NaN	NaN	1.31				1	2.1	78.806	0	0	0	0	0	0	4281100	1494200	2786900	Q06210;Q06210-2	Q06210;Q06210-2	Glucosamine--fructose-6-phosphate aminotransferase [isomerizing] 1	GFPT1	2
0.74217	0.91417	0.79145				4	17.6	28.601	18094000	8865700	9228100	26678000	11214000	15464000	3743300	2273400	1469900	Q06323-2;Q06323;Q06323-3;H0YLU2	Q06323-2;Q06323;Q06323-3	Proteasome activator complex subunit 1	PSME1	4
1.043	1.0173	1.0189				8	39.2	22.11	1099200000	460810000	638430000	2486700000	955270000	1531400000	1446100000	644960000	801190000	Q06830;A0A0A0MSI0;A0A0A0MRQ5	Q06830;A0A0A0MSI0	Peroxiredoxin-1	PRDX1	3
1.3497	1.1922	1.1596				3	6.3	66.022	13931000	5232800	8697800	13390000	4442300	8948100	31289000	13650000	17639000	Q07065	Q07065	Cytoskeleton-associated protein 4	CKAP4	1
0.564	0.48838	NaN				1	0.2	504.6	644030	303690	340330	1934100	1007500	926600	785170	346280	438890	Q07954;Q6PJ72	Q07954;Q6PJ72	Prolow-density lipoprotein receptor-related protein 1;Low-density lipoprotein receptor-related protein 1 85 kDa subunit;Low-density lipoprotein receptor-related protein 1 515 kDa subunit;Low-density lipoprotein receptor-related protein 1 intracellular domain	LRP1	2
NaN	1.403	NaN				1	2.5	58.875	0	0	0	6462600	2119600	4343000	0	0	0	Q07973;Q07973-3	Q07973;Q07973-3	1,25-dihydroxyvitamin D(3) 24-hydroxylase, mitochondrial	CYP24A1	2
1.1763	NaN	NaN				2	2.1	140.96	2045700	883370	1162300	0	0	0	0	0	0	Q08211	Q08211	ATP-dependent RNA helicase A	DHX9	1
2.2737	0.60083	1.3562				2	8.8	35.206	28652000	10275000	18377000	25861000	10468000	15393000	17082000	8102400	8979400	Q08257;Q08257-3;Q08257-2;A6NP24;C9JH92	Q08257;Q08257-3;Q08257-2;A6NP24;C9JH92	Quinone oxidoreductase	CRYZ	5
1.0265	0.99414	1.0288				45	21.3	629.09	403090000	178150000	224930000	475610000	208690000	266920000	525430000	240430000	285000000	Q09666	Q09666	Neuroblast differentiation-associated protein AHNAK	AHNAK	1
NaN	0.41577	NaN				1	2.1	64.218	0	0	0	1303200	952990	350180	0	0	0	Q10472	Q10472	Polypeptide N-acetylgalactosaminyltransferase 1;Polypeptide N-acetylgalactosaminyltransferase 1 soluble form	GALNT1	1
0.9046	0.98689	0.96462				1	2.3	104.64	1497100	637050	860000	4375600	1807000	2568500	3940400	1837000	2103300	Q10567;Q10567-2;Q10567-3;Q10567-4;C9J1E7	Q10567;Q10567-2;Q10567-3;Q10567-4;C9J1E7	AP-1 complex subunit beta-1	AP1B1	5
1.0497	1.0141	1.0124				5	7.8	85.862	14403000	6060500	8342500	43657000	15926000	27731000	55647000	27583000	28064000	Q12797;Q12797-10;E5RG56;Q12797-2;Q12797-8;Q12797-5;A0A0A0MSK8;Q12797-6;Q12797-9;Q12797-3;Q12797-4;Q12797-7;E5RG29;G3XAN5;E5RHK2;E5RHJ2	Q12797;Q12797-10	Aspartyl/asparaginyl beta-hydroxylase	ASPH	16
NaN	NaN	NaN				2	4.2	58.848	0	0	0	0	0	0	0	0	0	Q12874	Q12874	Splicing factor 3A subunit 3	SF3A3	1
NaN	1.4085	1.1764				3	4.6	95.807	0	0	0	144800	47223	97575	46615000	40913000	5702100	Q12906-7;Q12906;Q12906-3;Q12906-6;Q12906-2;Q12906-4;Q12906-5;K7EKJ9;K7ER69;K7EM82;K7ENK6;K7ERM6;K7EJ09;K7EQ75	Q12906-7;Q12906;Q12906-3;Q12906-6;Q12906-2;Q12906-4;Q12906-5;K7EKJ9;K7ER69;K7EM82;K7ENK6;K7ERM6	Interleukin enhancer-binding factor 3	ILF3	14
NaN	NaN	2.9223				1	2.1	80.109	0	0	0	0	0	0	17743000	3513300	14230000	Q12931;Q12931-2	Q12931;Q12931-2	Heat shock protein 75 kDa, mitochondrial	TRAP1	2
1.0874	0.92792	0.90816				1	0.9	144.75	3753000	1549100	2203900	4426800	1845200	2581600	3199100	1586900	1612200	Q13045;Q13045-3;Q13045-2	Q13045;Q13045-3;Q13045-2	Protein flightless-1 homolog	FLII	3
1.1518	1.2132	0.9388				3	14.8	20.811	13442000	5847900	7594500	5209100	1814400	3394700	1012300	495330	516980	Q13185;S4R2Y4;B8ZZ43;C9JMM0	Q13185;S4R2Y4;B8ZZ43;C9JMM0	Chromobox protein homolog 3	CBX3	4
1.2755	1.0728	1.304				2	3.6	100.2	8735800	3142400	5593400	8179600	2895000	5284600	27570000	10518000	17052000	Q13200;Q13200-3;Q13200-2;C9JPC0;F8WBS8	Q13200;Q13200-3;Q13200-2;C9JPC0;F8WBS8	26S proteasome non-ATPase regulatory subunit 2	PSMD2	5
NaN	NaN	NaN				1	0.9	180.97	0	0	0	0	0	0	0	0	0	Q13219	Q13219	Pappalysin-1	PAPPA	1
NaN	NaN	NaN				2	6.2	52.164	0	0	0	0	0	0	0	0	0	Q13283;E5RJU8;E5RIZ6;Q13283-2;E5RH42;E5RIF8;E5RI46	Q13283;E5RJU8;E5RIZ6;Q13283-2;E5RH42;E5RIF8;E5RI46	Ras GTPase-activating protein-binding protein 1	G3BP1	7
NaN	NaN	0.93272				2	6.2	36.501	0	0	0	0	0	0	3492300	1732100	1760200	Q13347	Q13347	Eukaryotic translation initiation factor 3 subunit I	EIF3I	1
1.6112	1.3565	0.82155				3	16.6	20.63	1007400	317790	689620	9705800	3230800	6475000	5672000	2210300	3461600	Q13442	Q13442	28 kDa heat- and acid-stable phosphoprotein	PDAP1	1
NaN	1.0931	NaN				1	2	51.212	0	0	0	23057000	8318500	14739000	0	0	0	Q13451	Q13451	Peptidyl-prolyl cis-trans isomerase FKBP5	FKBP5	1
0.96861	1.1107	1.0089				1	1.3	62.303	237680000	104720000	132960000	389530000	152980000	236550000	266850000	121100000	145740000	Q13478	Q13478	Interleukin-18 receptor 1	IL18R1	1
1.1381	0.90489	1.0796				7	4.2	284.54	8314400	3507900	4806500	22163000	8700400	13462000	75953000	37824000	38129000	Q13813;Q13813-3;A0A0D9SGF6;Q13813-2;A0A0D9SF54;A0A0D9SFF6	Q13813;Q13813-3;A0A0D9SGF6;Q13813-2;A0A0D9SF54	Spectrin alpha chain, brain	SPTAN1	6
0.76231	0.59701	0.65053				3	19.2	22.326	1184700	593650	591020	356740	190970	165770	1057600	598280	459340	Q14116;Q14116-2	Q14116;Q14116-2	Interleukin-18	IL18	2
NaN	0.58258	1.1807				2	10.3	32.233	0	0	0	4332600	1975000	2357600	1288700	535180	753500	Q14165;F5GX14;H0YG07;F5H1S8	Q14165;F5GX14;H0YG07;F5H1S8	Malectin	MLEC	4
1.2517	1.089	1.0517				16	3.7	532.4	8310100	2791900	5518200	17231000	7403300	9827400	36597000	15813000	20784000	Q14204	Q14204	Cytoplasmic dynein 1 heavy chain 1	DYNC1H1	1
0.93635	0.82771	1.9552				1	3.6	33.712	646710	235560	411140	953390	371540	581850	474290	176400	297890	Q14232	Q14232	Translation initiation factor eIF-2B subunit alpha	EIF2B1	1
NaN	NaN	NaN				2	4.7	70.958	0	0	0	0	0	0	0	0	0	Q14247-2;Q14247;Q14247-3	Q14247-2;Q14247;Q14247-3	Src substrate cortactin	CTTN	3
NaN	0.63643	NaN				2	2.2	291.02	0	0	0	10447000	4940500	5506900	0	0	0	Q14315;Q14315-2	Q14315;Q14315-2	Filamin-C	FLNC	2
1.222	1.0225	0.88326				2	4.5	70.253	12627000	5032000	7594800	7554600	3030400	4524200	20679000	11174000	9504900	Q14651;C9J0F3;C9J359	Q14651;C9J0F3;C9J359	Plastin-1	PLS1	3
NaN	1.4517	1.765				3	6.8	70.294	0	0	0	125410	30206	95207	4731700	1503200	3228500	Q14677-3;Q14677;Q14677-2;H0YD52	Q14677-3;Q14677;Q14677-2	Clathrin interactor 1	CLINT1	4
1.3895	NaN	1.3029				2	2.8	99.326	1199800	429960	769860	0	0	0	2033600	853400	1180200	Q14764	Q14764	Major vault protein	MVP	1
0.91711	0.96467	0.94297				7	21.6	35.869	78358000	33797000	44561000	42721000	17180000	25541000	72749000	35902000	36847000	Q14914;Q14914-2;Q5JVP2;F6XGT7;F2Z3J9	Q14914;Q14914-2;Q5JVP2	Prostaglandin reductase 1	PTGR1	5
0.85286	0.58511	1.0832				5	7.2	97.169	6497800	2952500	3545300	22463000	11684000	10779000	24037000	12294000	11742000	Q14974;J3QR48;Q14974-2;J3KTM9	Q14974;J3QR48	Importin subunit beta-1	KPNB1	4
NaN	1.1818	1.3737				1	2.9	51.922	0	0	0	872470	326810	545660	1022800	446900	575890	Q15008-4;Q15008;Q15008-2;Q15008-3	Q15008-4;Q15008;Q15008-2;Q15008-3	26S proteasome non-ATPase regulatory subunit 6	PSMD6	4
1.1539	1.2225	1.1546				3	3	162.46	5951700	2315700	3636000	6560600	2370400	4190200	20374000	8701700	11673000	Q15075	Q15075	Early endosome antigen 1	EEA1	1
1.4546	1.0783	1.0071				2	4.9	53.9	5637800	1816300	3821500	18556000	6678600	11877000	28635000	15061000	13574000	Q15084-2;Q15084-5;Q15084-4;Q15084;Q15084-3	Q15084-2;Q15084-5;Q15084-4;Q15084;Q15084-3	Protein disulfide-isomerase A6	PDIA6	5
1.0558	1.1297	0.9798				14	3.1	531.78	272090000	113470000	158620000	296600000	113680000	182920000	320620000	149500000	171120000	Q15149;Q15149-2;Q15149-3;Q15149-6;Q15149-4;Q15149-5;Q15149-9;Q15149-8;Q15149-7;H0YDN1;E9PMV1	Q15149;Q15149-2;Q15149-3;Q15149-6;Q15149-4;Q15149-5;Q15149-9;Q15149-8;Q15149-7	Plectin	PLEC	11
NaN	0.8197	1.5726				1	3.5	32.66	0	0	0	4562000	2192200	2369800	10281000	5046300	5234300	Q15181	Q15181	Inorganic pyrophosphatase	PPA1	1
NaN	NaN	NaN				1	1.2	135.58	0	0	0	0	0	0	0	0	0	Q15393;Q15393-3	Q15393;Q15393-3	Splicing factor 3B subunit 3	SF3B3	2
2.7299	0.94497	5.4794	+			1	4.3	31.54	13803000	5607600	8195900	32612000	14097000	18515000	12487000	5772300	6715100	Q15404	Q15404	Ras suppressor protein 1	RSU1	1
NaN	NaN	NaN				2	10	36.413	0	0	0	0	0	0	0	0	0	Q15417;Q15417-2;Q15417-3;E9PDU6	Q15417;Q15417-2;Q15417-3;E9PDU6	Calponin-3	CNN3	4
1.6554	2.0614	1.4263				2	3.5	88.885	447140	136950	310190	5338800	1666100	3672800	9175300	3693900	5481400	Q15459;Q15459-2	Q15459;Q15459-2	Splicing factor 3A subunit 1	SF3A1	2
NaN	0.8539	NaN				1	3	29.999	0	0	0	19328000	7957700	11370000	0	0	0	Q15691	Q15691	Microtubule-associated protein RP/EB family member 1	MAPRE1	1
0.93557	0.89623	1.0967				4	12.5	52.351	60047000	27561000	32486000	42776000	17479000	25297000	54259000	27455000	26804000	Q16719;Q16719-2;A0A087X297;A0A087WYM2;B8ZZA3;A0A087WYQ7	Q16719;Q16719-2;A0A087X297;A0A087WYM2;B8ZZA3	Kynureninase	KYNU	6
NaN	NaN	0.33705	+			1	1	130.32	0	0	0	0	0	0	4927800	3841100	1086700	Q16760-2	Q16760-2			1
NaN	NaN	NaN				1	0.6	150.83	0	0	0	0	0	0	0	0	0	Q29RF7;Q29RF7-3	Q29RF7;Q29RF7-3	Sister chromatid cohesion protein PDS5 homolog A	PDS5A	2
NaN	0.81554	1.1769				1	2.4	65.54	0	0	0	1189000	463480	725540	4176200	1707200	2469000	Q2WGJ6	Q2WGJ6	Kelch-like protein 38	KLHL38	1
1.1058	1.0931	1.0801				4	6.7	89.252	4511600	1945400	2566200	15219000	6139900	9079000	15393000	7288900	8104200	Q32MZ4;Q32MZ4-2;Q32MZ4-3	Q32MZ4;Q32MZ4-2;Q32MZ4-3	Leucine-rich repeat flightless-interacting protein 1	LRRFIP1	3
NaN	0.34596	NaN				1	2.5	45.547	0	0	0	10430000	6338300	4091900	0	0	0	Q52LJ0-2;Q52LJ0	Q52LJ0-2;Q52LJ0	Protein FAM98B	FAM98B	2
0.97346	0.89588	NaN				5	17	32.805	45230000	19868000	25362000	51032000	19193000	31838000	0	0	0	Q53H82	Q53H82	Beta-lactamase-like protein 2	LACTB2	1
NaN	NaN	NaN				2	10	26.923	0	0	0	0	0	0	0	0	0	Q99714;Q99714-2;Q5H928	Q99714;Q99714-2;Q5H928	3-hydroxyacyl-CoA dehydrogenase type-2	HSD17B10	3
1.094	NaN	1.2951				1	5	25.038	36923000	15252000	21671000	0	0	0	83863000	34478000	49385000	Q5JT25	Q5JT25	Ras-related protein Rab-41	RAB41	1
NaN	NaN	1.0009				1	15.9	10.892	0	0	0	0	0	0	9223800	4246900	4976900	Q5JXL7	Q5JXL7		DKFZp586I031	1
NaN	NaN	NaN				1	1.2	99.808	0	0	0	0	0	0	0	0	0	Q9UI47;Q9UI47-2;Q5SW23	Q9UI47;Q9UI47-2;Q5SW23	Catenin alpha-3	CTNNA3	3
NaN	NaN	NaN				1	8.6	15.489	0	0	0	0	0	0	0	0	0	Q5T1J5;Q9Y6H1	Q5T1J5;Q9Y6H1	Putative coiled-coil-helix-coiled-coil-helix domain-containing protein CHCHD2P9, mitochondrial;Coiled-coil-helix-coiled-coil-helix domain-containing protein 2, mitochondrial	CHCHD2P9;CHCHD2	2
NaN	NaN	NaN				1	1.6	73.964	0	0	0	0	0	0	0	0	0	Q9BZE4;Q9BZE4-2;Q5T3R7	Q9BZE4;Q9BZE4-2;Q5T3R7	Nucleolar GTP-binding protein 1	GTPBP4	3
NaN	NaN	NaN				1	2.4	53.543	0	0	0	0	0	0	0	0	0	Q86YB8;Q5TAE8	Q86YB8;Q5TAE8	ERO1-like protein beta	ERO1LB	2
0.8295	0.82176	0.84507				30	16.4	280.74	1729300000	868310000	860950000	2787200000	1261300000	1525900000	3536500000	1808100000	1728400000	P21333;P21333-2;Q60FE5;Q5HY54;A0A087WWY3;F8WE98;H0Y5C6;H0Y5F3	P21333;P21333-2;Q60FE5;Q5HY54;A0A087WWY3	Filamin-A	FLNA	8
18.959	NaN	NaN				1	1.9	65.949	20178000	419850	19758000	0	0	0	0	0	0	Q68D06-2	Q68D06-2			1
NaN	0.76422	0.65422				1	13.4	25.887	0	0	0	5785800	3024900	2760900	13719000	8967100	4751900	Q693B1	Q693B1	BTB/POZ domain-containing protein KCTD11	KCTD11	1
NaN	NaN	NaN				1	17.4	23.883	0	0	0	0	0	0	0	0	0	Q6H3X3-2	Q6H3X3-2			1
NaN	NaN	NaN				1	3.4	43.426	0	0	0	0	0	0	0	0	0	Q6P1Q9;Q6P1Q9-2	Q6P1Q9;Q6P1Q9-2	Methyltransferase-like protein 2B	METTL2B	2
NaN	NaN	NaN				1	4.8	34.613	0	0	0	0	0	0	0	0	0	Q6P2I3;Q96GK7	Q6P2I3;Q96GK7	Fumarylacetoacetate hydrolase domain-containing protein 2B;Fumarylacetoacetate hydrolase domain-containing protein 2A	FAHD2B;FAHD2A	2
1.3734	NaN	NaN				1	5.6	27.128	1323300	543340	779920	0	0	0	0	0	0	Q6P587-3;Q6P587-2;Q6P587	Q6P587-3;Q6P587-2;Q6P587	Acylpyruvase FAHD1, mitochondrial	FAHD1	3
NaN	1.01	1.4201				2	4.5	70.441	0	0	0	250180	101910	148270	11034000	4475400	6559000	Q6PCE3	Q6PCE3	Glucose 1,6-bisphosphate synthase	PGM2L1	1
NaN	NaN	0.72081				1	1.9	73.562	0	0	0	0	0	0	4412300	2168500	2243800	Q6PI48	Q6PI48	Aspartate--tRNA ligase, mitochondrial	DARS2	1
0.0028468	0.0053228	0.16026				1	6.2	38.864	596710000	594370000	2340400	17905000	17824000	80604	1615100	1429500	185610	Q6UXS9;Q6UXS9-3	Q6UXS9;Q6UXS9-3	Inactive caspase-12	CASP12	2
NaN	NaN	NaN				1	3.8	58.086	0	0	0	0	0	0	0	0	0	Q6VN20-2;Q96S59-3	Q6VN20-2;Q96S59-3			2
1.0556	1.1259	0.97615				1	0.6	161.69	28115000	11634000	16481000	37489000	14145000	23343000	89929000	40658000	49272000	Q6YHK3;Q6YHK3-4;Q6YHK3-3	Q6YHK3;Q6YHK3-4;Q6YHK3-3	CD109 antigen	CD109	3
NaN	NaN	NaN				1	2.2	45.394	0	0	0	0	0	0	0	0	0	Q6YN16;Q6YN16-2	Q6YN16;Q6YN16-2	Hydroxysteroid dehydrogenase-like protein 2	HSDL2	2
1.0871	0.88653	1.0979				1	2.5	45.661	10267000	4582200	5685100	5211700	2943200	2268500	14280000	5894400	8385600	Q6ZV65;Q6ZV65-1	Q6ZV65;Q6ZV65-1	Protein FAM47E	FAM47E	2
0.98078	0.80044	0.82555				3	4	102	21126000	9628200	11497000	37643000	17116000	20527000	43598000	23710000	19888000	Q7KZF4	Q7KZF4	Staphylococcal nuclease domain-containing protein 1	SND1	1
NaN	NaN	NaN				1	2	81.746	0	0	0	0	0	0	0	0	0	Q7Z2T5	Q7Z2T5	TRMT1-like protein	TRMT1L	1
0.81053	0.56014	0.64741				1	1	232.01	10255000	5589100	4665500	16762000	9072900	7689400	20850000	10792000	10058000	Q7Z406-2;Q7Z406-6;Q7Z406;Q7Z406-4;Q7Z406-5;M0QY43	Q7Z406-2;Q7Z406-6;Q7Z406;Q7Z406-4;Q7Z406-5;M0QY43	Myosin-14	MYH14	6
0.97792	0.94864	0.90065				10	9.5	156.27	21086000	8621200	12465000	29677000	11814000	17863000	19442000	8872000	10570000	Q86UP2;Q86UP2-4;Q86UP2-3;Q86UP2-2;G3V4Y7;B7Z6P3;G3V5P0;H0YJP2;H0YJV5	Q86UP2;Q86UP2-4;Q86UP2-3;Q86UP2-2;G3V4Y7	Kinectin	KTN1	9
0.97269	1.1692	1.2094				6	6.7	136.37	18699000	7506100	11193000	21441000	8019900	13421000	16834000	7672500	9161500	Q86VP6;Q86VP6-2;A0A0C4DGH5;O75155;O75155-2;F8WBB8;F5H6I6	Q86VP6;Q86VP6-2;A0A0C4DGH5	Cullin-associated NEDD8-dissociated protein 1	CAND1	7
0.96845	0.89161	0.82956				17	11.4	616.62	41595000	19504000	22090000	42552000	19203000	23349000	57864000	29260000	28604000	Q8IVF2;Q8IVF2-3	Q8IVF2;Q8IVF2-3	Protein AHNAK2	AHNAK2	2
NaN	NaN	NaN				1	1.2	115.6	0	0	0	0	0	0	0	0	0	Q8IVF6	Q8IVF6	Ankyrin repeat domain-containing protein 18A	ANKRD18A	1
NaN	NaN	NaN				1	0.7	195.91	0	0	0	0	0	0	0	0	0	Q8IWJ2	Q8IWJ2	GRIP and coiled-coil domain-containing protein 2	GCC2	1
NaN	NaN	NaN				1	4.7	27.422	0	0	0	0	0	0	0	0	0	Q8IWL3	Q8IWL3	Iron-sulfur cluster co-chaperone protein HscB, mitochondrial	HSCB	1
1.4208	1.1177	1.3545				2	3.6	102.9	6788400	2628300	4160100	10731000	4145700	6585300	8977800	3649300	5328600	Q8N163;Q8N163-2;E5RHJ4;H0YC58;E5RFJ3;E5RGU7;H0YC69	Q8N163;Q8N163-2;E5RHJ4;H0YC58;E5RFJ3;E5RGU7;H0YC69	DBIRD complex subunit KIAA1967	KIAA1967	7
NaN	NaN	NaN				2	3.3	90.496	0	0	0	0	0	0	0	0	0	Q8N5U6-2;Q8N5U6;H0YGX5;H0YFQ9;H0YFN9;H0YF69;F5H510	Q8N5U6-2;Q8N5U6;H0YGX5;H0YFQ9;H0YFN9;H0YF69;F5H510	RING finger protein 10	RNF10	7
NaN	0.45663	NaN				1	1.8	79.443	0	0	0	709160	374810	334350	0	0	0	Q8NBF2	Q8NBF2	NHL repeat-containing protein 2	NHLRC2	1
NaN	NaN	1.027				1	2.5	47.628	0	0	0	0	0	0	6081400	3789800	2291600	Q8NBS9;Q8NBS9-2	Q8NBS9;Q8NBS9-2	Thioredoxin domain-containing protein 5	TXNDC5	2
2.0273	NaN	1.5056				1	3.9	44.965	156340	43149	113190	0	0	0	184810	72777	112030	Q8NC51;Q8NC51-2;Q8NC51-3;Q8NC51-4	Q8NC51;Q8NC51-2;Q8NC51-3;Q8NC51-4	Plasminogen activator inhibitor 1 RNA-binding protein	SERBP1	4
NaN	NaN	NaN				1	6.9	24.269	0	0	0	0	0	0	0	0	0	Q8NDC0	Q8NDC0	MAPK-interacting and spindle-stabilizing protein-like	MAPK1IP1L	1
NaN	NaN	NaN				1	1.3	140.02	0	0	0	0	0	0	0	0	0	Q8NDI1;Q8NDI1-2;Q8NDI1-3	Q8NDI1;Q8NDI1-2;Q8NDI1-3	EH domain-binding protein 1	EHBP1	3
0.035579	NaN	NaN				1	1.4	144.28	247670	241030	6635.7	0	0	0	0	0	0	Q8NET4	Q8NET4	Retrotransposon gag domain-containing protein 1	RGAG1	1
1.1772	NaN	0.97215				2	3	79.49	538210	231830	306370	0	0	0	17650000	7700400	9949500	Q8TC07;Q8TC07-3;Q8TC07-2;C9JA93;F8WCB5;F8VV61	Q8TC07;Q8TC07-3;Q8TC07-2;C9JA93;F8WCB5;F8VV61	TBC1 domain family member 15	TBC1D15	6
1.3299	1.4635	0.96577				1	0.7	168.59	2462600	999530	1463100	4750300	2242600	2507800	6291600	3227800	3063900	Q8TEQ6	Q8TEQ6	Gem-associated protein 5	GEMIN5	1
1.0209	1.0364	NaN				2	2.9	96.771	7295800	2883100	4412700	6168500	2303800	3864700	0	0	0	Q8WUM4-2;Q8WUM4;Q8WUM4-3;C9IZF9	Q8WUM4-2;Q8WUM4;Q8WUM4-3;C9IZF9	Programmed cell death 6-interacting protein	PDCD6IP	4
1.2615	5.3817	1.5565				1	5.3	23.128	453530	157580	295950	12804000	608980	12195000	10463000	1787200	8676100	Q8WW59	Q8WW59	SPRY domain-containing protein 4	SPRYD4	1
NaN	NaN	NaN				1	8.5	22.487	0	0	0	0	0	0	0	0	0	Q92522	Q92522	Histone H1x	H1FX	1
NaN	0.51215	NaN				1	3.4	57.821	0	0	0	3191500	2062100	1129400	0	0	0	Q92526;Q92526-3;Q92526-2	Q92526;Q92526-3;Q92526-2	T-complex protein 1 subunit zeta-2	CCT6B	3
1.032	1.0266	NaN				3	4.4	97.459	1796000	674720	1121200	2838900	1150300	1688600	0	0	0	Q92598-4;Q92598;Q92598-3;Q92598-2;A0A0A0MSM0;Q5TBM3;R4GN69	Q92598-4;Q92598;Q92598-3;Q92598-2;A0A0A0MSM0	Heat shock protein 105 kDa	HSPH1	7
1.1472	1.2196	1.1852				7	3.1	292.75	4343000	1663800	2679200	32689000	12770000	19919000	23171000	9663500	13507000	Q92616	Q92616	Translational activator GCN1	GCN1L1	1
0.86742	0.99308	0.30456				1	5.2	28.787	65167000	28962000	36205000	39778000	15738000	24040000	894850	597820	297030	Q92688;Q92688-2	Q92688;Q92688-2	Acidic leucine-rich nuclear phosphoprotein 32 family member B	ANP32B	2
1.7056	NaN	2.2261				2	7.9	35.964	5611400	3346100	2265200	0	0	0	4180000	2769700	1410200	Q92820	Q92820	Gamma-glutamyl hydrolase	GGH	1
NaN	0.62424	NaN				1	3.2	80.272	0	0	0	5382000	3707000	1675000	0	0	0	Q92841;Q92841-2;Q92841-3;Q92841-1	Q92841;Q92841-2;Q92841-3;Q92841-1	Probable ATP-dependent RNA helicase DDX17	DDX17	4
0.84962	0.87484	0.95858				2	1.8	154.59	6197700	2942000	3255700	3971500	1909000	2062600	7064200	3389300	3674900	Q92878-2;Q92878;Q92878-3	Q92878-2;Q92878;Q92878-3	DNA repair protein RAD50	RAD50	3
0.65527	0.81186	0.87952				1	0.5	174.21	113080000	56839000	56238000	253850000	115710000	138150000	201540000	101740000	99808000	Q92887	Q92887	Canalicular multispecific organic anion transporter 1	ABCC2	1
NaN	0.68169	NaN				1	1.3	102.35	0	0	0	582050	259040	323020	0	0	0	Q92973;Q92973-2;Q92973-3	Q92973;Q92973-2;Q92973-3	Transportin-1	TNPO1	3
NaN	NaN	0.89684				2	0.9	292.28	0	0	0	0	0	0	1293500	621650	671890	Q93008;Q93008-1;O00507;O00507-2	Q93008;Q93008-1;O00507;O00507-2	Probable ubiquitin carboxyl-terminal hydrolase FAF-X;Probable ubiquitin carboxyl-terminal hydrolase FAF-Y	USP9X;USP9Y	4
1.5127	NaN	1.2965				1	3.9	34.93	15161000	4872500	10289000	0	0	0	12521000	5039100	7482000	Q96AG4	Q96AG4	Leucine-rich repeat-containing protein 59	LRRC59	1
NaN	0.59872	0.7114				1	2.1	64.244	0	0	0	2477200	1372200	1105000	7212400	4321600	2890800	Q96AY3	Q96AY3	Peptidyl-prolyl cis-trans isomerase FKBP10	FKBP10	1
NaN	NaN	NaN				1	3.7	39.017	0	0	0	0	0	0	0	0	0	Q96BW5;Q96BW5-2	Q96BW5;Q96BW5-2	Phosphotriesterase-related protein	PTER	2
NaN	1.1497	NaN				1	9.2	14.091	0	0	0	3702100	998990	2703100	0	0	0	Q96CJ1-2	Q96CJ1-2			1
NaN	NaN	NaN				1	2.5	48.167	0	0	0	0	0	0	0	0	0	Q96DR7-3	Q96DR7-3			1
NaN	NaN	NaN				1	3.8	38.472	0	0	0	0	0	0	0	0	0	Q96DX7	Q96DX7	Tripartite motif-containing protein 44	TRIM44	1
NaN	NaN	NaN				1	2.9	51.871	0	0	0	0	0	0	0	0	0	Q96JJ7	Q96JJ7	Protein disulfide-isomerase TMX3	TMX3	1
1.109	1.0239	1.1279				1	2.5	52.764	15187000	6633400	8553200	17397000	6844800	10552000	24368000	10973000	13395000	Q96N66;Q96N66-2	Q96N66;Q96N66-2	Lysophospholipid acyltransferase 7	MBOAT7	2
0.94953	0.66899	NaN				2	3.4	91.706	121050	48265	72786	47700	21207	26493	0	0	0	Q96QK1;I3L4P4;I3L4S0	Q96QK1;I3L4P4;I3L4S0	Vacuolar protein sorting-associated protein 35	VPS35	3
NaN	NaN	NaN				1	5.4	62.022	0	0	0	0	0	0	0	0	0	Q96S66;Q96S66-2;Q96S66-3;Q96S66-4	Q96S66;Q96S66-2;Q96S66-3;Q96S66-4	Chloride channel CLIC-like protein 1	CLCC1	4
1.1439	1.3068	0.99903				1	4	29.965	1586300	636870	949480	6715700	2268000	4447700	1450600	695870	754770	Q99436	Q99436	Proteasome subunit beta type-7	PSMB7	1
0.021702	NaN	NaN				1	1	96.458	197220	194250	2969.5	0	0	0	0	0	0	Q99814	Q99814	Endothelial PAS domain-containing protein 1	EPAS1	1
1.2579	1.0306	1.3162				4	10.3	59.366	16380000	6370700	10009000	19870000	7116200	12753000	34432000	14201000	20231000	Q99832;Q99832-3;F8WAM2;Q99832-4;Q99832-2;F8WBP8	Q99832;Q99832-3;F8WAM2	T-complex protein 1 subunit eta	CCT7	6
NaN	NaN	0.99202				1	6.9	22.655	0	0	0	0	0	0	320350	142130	178210	Q9BRP8	Q9BRP8	Partner of Y14 and mago	WIBG	1
NaN	NaN	NaN				1	3.6	47.524	0	0	0	0	0	0	0	0	0	Q9BSU1	Q9BSU1	UPF0183 protein C16orf70	C16orf70	1
NaN	NaN	0.56401				1	5	21.498	0	0	0	0	0	0	649430	446510	202930	Q9BV57;Q9BV57-2	Q9BV57;Q9BV57-2	1,2-dihydroxy-3-keto-5-methylthiopentene dioxygenase	ADI1	2
1.1124	0.96651	1.007				1	4.9	26.21	243410000	101520000	141890000	39130000	15833000	23297000	181300000	83628000	97669000	Q9BVC6	Q9BVC6	Transmembrane protein 109	TMEM109	1
NaN	NaN	1.0407				1	4.7	32.662	0	0	0	0	0	0	118260	52902	65357	Q9BW60;Q9BW60-2	Q9BW60;Q9BW60-2	Elongation of very long chain fatty acids protein 1	ELOVL1	2
0.85852	0.94628	1.03				2	5.2	21.445	407910000	156670000	251240000	353170000	133320000	219850000	322430000	143070000	179360000	Q9BY32;Q9BY32-3	Q9BY32;Q9BY32-3	Inosine triphosphate pyrophosphatase	ITPA	2
NaN	NaN	NaN				1	1.2	105.41	0	0	0	0	0	0	0	0	0	Q9BYX2;Q9BYX2-2;Q9BYX2-3	Q9BYX2;Q9BYX2-2;Q9BYX2-3	TBC1 domain family member 2A	TBC1D2	3
1.0135	NaN	NaN	+			1	1.2	116.69	341990	157450	184530	0	0	0	0	0	0	Q9BYX4	Q9BYX4	Interferon-induced helicase C domain-containing protein 1	IFIH1	1
NaN	0.64925	NaN				1	25.5	10.897	0	0	0	776890	353380	423510	0	0	0	Q9GZP8;Q9GZP8-2	Q9GZP8;Q9GZP8-2	Immortalization up-regulated protein	IMUP	2
NaN	NaN	NaN				1	11	12.349	0	0	0	0	0	0	0	0	0	Q9GZT3;Q9GZT3-2	Q9GZT3;Q9GZT3-2	SRA stem-loop-interacting RNA-binding protein, mitochondrial	SLIRP	2
NaN	NaN	NaN				1	1.7	72.95	0	0	0	0	0	0	0	0	0	Q9H094;Q9H094-3;Q9H094-2	Q9H094;Q9H094-3;Q9H094-2	Neuroblastoma breakpoint family member 3	NBPF3	3
1.0258	1.0407	1.0361				1	1.6	53.401	232120000	98518000	133610000	114340000	45410000	68930000	113050000	53877000	59172000	Q9H2A2;Q9H2A2-4;Q9H2A2-2	Q9H2A2;Q9H2A2-4;Q9H2A2-2	Aldehyde dehydrogenase family 8 member A1	ALDH8A1	3
NaN	NaN	NaN				1	1	155.98	0	0	0	0	0	0	0	0	0	Q9H2M9	Q9H2M9	Rab3 GTPase-activating protein non-catalytic subunit	RAB3GAP2	1
1.8209	1.4128	1.6412				3	10.6	39.638	7596100	2265100	5331000	9041300	2735400	6305900	21371000	6714200	14657000	Q9H2U2-2;Q9H2U2;Q9H2U2-3;Q9H2U2-6;H0Y9D8;D6R967;D6RGV9;Q9H2U2-4;D6RAD3;A0A0C4DGB9	Q9H2U2-2;Q9H2U2;Q9H2U2-3;Q9H2U2-6;H0Y9D8;D6R967	Inorganic pyrophosphatase 2, mitochondrial	PPA2	10
NaN	NaN	NaN				1	3.2	31.791	0	0	0	0	0	0	0	0	0	Q9H3N1	Q9H3N1	Thioredoxin-related transmembrane protein 1	TMX1	1
0.70476	1.5886	1.5946				2	6.1	60.593	483850	187200	296650	1471900	427390	1044500	5625800	1960300	3665400	Q9H3P7	Q9H3P7	Golgi resident protein GCP60	ACBD3	1
1.1971	0.95713	NaN				1	4.5	24.95	4254400	1715600	2538900	6028300	2491100	3537200	0	0	0	Q9H444	Q9H444	Charged multivesicular body protein 4b	CHMP4B	1
1.3003	0.8535	1.3479				4	10	72.595	2142900	732390	1410600	5194900	2113700	3081200	6304100	2412200	3891900	Q9H4A4;A6NKB8;C9JMZ3;H7C2T3	Q9H4A4;A6NKB8;C9JMZ3	Aminopeptidase B	RNPEP	4
NaN	NaN	NaN				1	1.9	47.091	0	0	0	0	0	0	0	0	0	Q9H553;Q9H553-2	Q9H553;Q9H553-2	Alpha-1,3/1,6-mannosyltransferase ALG2	ALG2	2
1.1634	NaN	NaN				1	3.4	48.674	2267100	787810	1479300	0	0	0	0	0	0	Q9H8Y8-3;Q9H8Y8;Q9H8Y8-2	Q9H8Y8-3;Q9H8Y8;Q9H8Y8-2	Golgi reassembly-stacking protein 2	GORASP2	3
NaN	NaN	NaN				1	9.3	25.938	0	0	0	0	0	0	1562000	0	1562000	Q9HAC8	Q9HAC8	Ubiquitin domain-containing protein 1	UBTD1	1
0.69804	0.84786	0.87976				1	3.6	31.932	183240000	94088000	89150000	221500000	97802000	123700000	401030000	198720000	202300000	Q9HAN9	Q9HAN9	Nicotinamide mononucleotide adenylyltransferase 1	NMNAT1	1
NaN	2.1336	2.0519				2	11.1	24.279	0	0	0	1126900	248710	878160	1767600	499060	1268500	Q9HAV7	Q9HAV7	GrpE protein homolog 1, mitochondrial	GRPEL1	1
0.90019	0.81163	0.63214				2	11.1	30.062	10355000	4465300	5889800	12132000	5189500	6942000	1336700	586060	750600	Q9NQ88	Q9NQ88	Probable fructose-2,6-bisphosphatase TIGAR	TIGAR	1
1.1607	1.4265	1.264				2	11.1	22.367	15300000	5504600	9795700	9967300	2938900	7028400	12752000	5165800	7586500	Q9NR31;Q9Y6B6;D6RD69;Q9NR31-2;D6RDB2;Q5SQT8;H0Y5E8;D6RAA2;X1WI22	Q9NR31;Q9Y6B6;D6RD69;Q9NR31-2;D6RDB2;Q5SQT8;H0Y5E8;D6RAA2;X1WI22	GTP-binding protein SAR1a;GTP-binding protein SAR1b	SAR1A;SAR1B	9
1.5506	NaN	1.3823				2	5	40.307	532190	188260	343930	0	0	0	278840	110270	168560	Q9NR45	Q9NR45	Sialic acid synthase	NANS	1
NaN	NaN	2.0819				1	0.9	113.79	0	0	0	0	0	0	15296000	3475700	11821000	Q9NSE4	Q9NSE4	Isoleucine--tRNA ligase, mitochondrial	IARS2	1
NaN	NaN	NaN				1	3.3	33.698	0	0	0	0	0	0	0	0	0	Q9NTX5;Q9NTX5-2;Q9NTX5-6;Q9NTX5-3	Q9NTX5;Q9NTX5-2;Q9NTX5-6;Q9NTX5-3	Ethylmalonyl-CoA decarboxylase	ECHDC1	4
1.46	1.3154	NaN				1	7.3	18.609	108410	36759	71651	110060	41579	68479	0	0	0	Q9NV35	Q9NV35	Probable 8-oxo-dGTP diphosphatase NUDT15	NUDT15	1
NaN	0.92446	NaN				1	6.5	29.988	0	0	0	1412500	479550	932940	0	0	0	Q9NVS9;Q9NVS9-3;Q9NVS9-4	Q9NVS9;Q9NVS9-3;Q9NVS9-4	Pyridoxine-5-phosphate oxidase	PNPO	3
1.3892	NaN	NaN				1	2.2	61.124	270110	90468	179640	0	0	0	0	0	0	Q9NXV6	Q9NXV6	CDKN2A-interacting protein	CDKN2AIP	1
NaN	NaN	NaN	+			1	2.3	46.021	0	0	0	0	0	0	0	0	0	Q9NY97	Q9NY97	UDP-GlcNAc:betaGal beta-1,3-N-acetylglucosaminyltransferase 2	B3GNT2	1
1.0182	1.8063	NaN				2	1.5	177.19	6744500	2893500	3851000	2878100	1136500	1741600	0	0	0	Q9NYU2;Q9NYU2-2	Q9NYU2;Q9NYU2-2	UDP-glucose:glycoprotein glucosyltransferase 1	UGGT1	2
1.1352	0.89677	0.90343				2	2.7	125.27	3537100	1434000	2103000	7146200	2604200	4542000	6498400	2995600	3502800	Q9NZB2-6;Q9NZB2;Q9NZB2-4;Q9NZB2-5;Q9NZB2-2;A0A0C4DH52	Q9NZB2-6;Q9NZB2;Q9NZB2-4;Q9NZB2-5;Q9NZB2-2;A0A0C4DH52	Constitutive coactivator of PPAR-gamma-like protein 1	FAM120A	6
0.7892	1.4612	0.99303				2	4.5	63.48	24858000	10628000	14230000	13604000	5262100	8342100	30732000	15673000	15060000	Q9NZI8;Q9NZI8-2	Q9NZI8;Q9NZI8-2	Insulin-like growth factor 2 mRNA-binding protein 1	IGF2BP1	2
0.75403	0.76114	0.94406				7	4.1	234.71	8498400	3985100	4513300	15437000	6975400	8461400	26573000	12289000	14285000	Q9NZM1;Q9NZM1-6;Q9NZM1-2;Q9NZM1-3;H0YD14;Q9NZM1-5;Q9NZM1-7;Q9NZM1-8	Q9NZM1;Q9NZM1-6;Q9NZM1-2;Q9NZM1-3;H0YD14;Q9NZM1-5	Myoferlin	MYOF	8
NaN	0.62677	NaN				1	3.1	61.161	0	0	0	1467700	801030	666670	0	0	0	Q9NZN4;Q9NZN4-2	Q9NZN4;Q9NZN4-2	EH domain-containing protein 2	EHD2	2
NaN	0.83604	1.1719				4	16	32.613	0	0	0	534320	194940	339380	493410	209060	284350	Q9P0L0-2;Q9P0L0;J3QKM9	Q9P0L0-2;Q9P0L0;J3QKM9	Vesicle-associated membrane protein-associated protein A	VAPA	3
NaN	1.5236	NaN				1	2.9	56.084	0	0	0	7236400	2207900	5028500	0	0	0	Q9P258	Q9P258	Protein RCC2	RCC2	1
NaN	NaN	NaN				1	2.5	70.157	0	0	0	0	0	0	0	0	0	Q9P2B4	Q9P2B4	CTTNBP2 N-terminal-like protein	CTTNBP2NL	1
1.1774	1.4868	NaN				3	3.2	134.46	15929000	6554300	9374800	30686000	13443000	17243000	0	0	0	Q9P2J5;Q9P2J5-2;Q9P2J5-3	Q9P2J5;Q9P2J5-2;Q9P2J5-3	Leucine--tRNA ligase, cytoplasmic	LARS	3
NaN	NaN	NaN				1	1.8	97.621	3286900	0	3286900	0	0	0	0	0	0	Q9UBF2;Q9UBF2-2	Q9UBF2;Q9UBF2-2	Coatomer subunit gamma-2	COPG2	2
NaN	1.1292	NaN				2	2.8	71.223	0	0	0	23983000	8594300	15389000	0	0	0	Q9UBT2;Q9UBT2-2;K7EPL2	Q9UBT2;Q9UBT2-2;K7EPL2	SUMO-activating enzyme subunit 2	UBA2	3
NaN	NaN	1.4173				1	4	28.466	0	0	0	0	0	0	1102600	391080	711570	Q9UFN0	Q9UFN0	Protein NipSnap homolog 3A	NIPSNAP3A	1
NaN	1.2233	NaN				1	2.1	70.729	0	0	0	3838400	1306800	2531600	0	0	0	Q9UHB9;Q9UHB9-2;Q9UHB9-4;Q9UHB9-3	Q9UHB9;Q9UHB9-2;Q9UHB9-4;Q9UHB9-3	Signal recognition particle 68 kDa protein	SRP68	4
0.95136	1.0301	1.0465				4	7.2	65.401	16096000	7901800	8194000	28799000	12244000	16555000	31797000	14185000	17611000	Q9UHD8;Q9UHD8-5;Q9UHD8-2;Q9UHD8-7;Q9UHD8-3;Q9UHD8-8;Q9UHD8-9;Q9UHD8-4;K7EL40;K7EK18;K7EQD7;K7EIE4;K7ER52;K7ELJ9;K7ER14;K7EJZ2;K7EJ51;K7ENQ5;K7EN52;K7EKN4;K7EIR4;K7ERG1	Q9UHD8;Q9UHD8-5;Q9UHD8-2;Q9UHD8-7;Q9UHD8-3;Q9UHD8-8;Q9UHD8-9;Q9UHD8-4;K7EL40;K7EK18;K7EQD7;K7EIE4;K7ER52;K7ELJ9	Septin-9	2017-09-09	22
NaN	1.4626	1.3828				2	4.6	56.639	0	0	0	14711000	5806300	8904300	15463000	6462900	8999700	Q9UHG3;Q9UHG3-2;F8W8W4;C9K055	Q9UHG3;Q9UHG3-2;F8W8W4;C9K055	Prenylcysteine oxidase 1	PCYOX1	4
NaN	NaN	1.1128				1	7.8	16.648	0	0	0	0	0	0	602780	274420	328360	Q9UHV9	Q9UHV9	Prefoldin subunit 2	PFDN2	1
1.5725	2.085	1.4791				1	6.6	25.565	16881000	4030400	12851000	28550000	5770400	22780000	3198900	983950	2215000	Q9UIJ7;Q9UIJ7-3;Q9UIJ7-2	Q9UIJ7;Q9UIJ7-3;Q9UIJ7-2	GTP:AMP phosphotransferase, mitochondrial	AK3	3
NaN	NaN	NaN				1	3.4	55.799	0	0	0	0	0	0	0	0	0	Q9UJA5;Q9UJA5-4	Q9UJA5;Q9UJA5-4	tRNA (adenine(58)-N(1))-methyltransferase non-catalytic subunit TRM6	TRMT6	2
1.3526	NaN	1.2668				1	2.4	55.215	459250	176370	282880	0	0	0	504210	238660	265550	Q9UKZ1	Q9UKZ1	UPF0760 protein C2orf29	C2orf29	1
NaN	NaN	1.0502				3	20.3	20.55	0	0	0	0	0	0	2946600	1289400	1657300	Q9ULC4-3;Q9ULC4;Q9ULC4-2	Q9ULC4-3;Q9ULC4;Q9ULC4-2	Malignant T-cell-amplified sequence 1	MCTS1	3
NaN	NaN	NaN				1	5.8	18.856	0	0	0	0	0	0	0	0	0	Q9UMX5	Q9UMX5	Neudesin	NENF	1
NaN	0.79439	1.1054				2	9.1	40.816	0	0	0	6440900	3186300	3254600	2060500	957970	1102500	Q9UNZ2-5;Q9UNZ2;Q9UNZ2-4;F2Z2K0;Q9UNZ2-6	Q9UNZ2-5;Q9UNZ2;Q9UNZ2-4;F2Z2K0;Q9UNZ2-6	NSFL1 cofactor p47	NSFL1C	5
1.5367	1.6503	1.3217				7	20.1	43.786	69270000	22623000	46646000	56334000	17408000	38927000	56390000	21353000	35037000	Q9UQ80;Q9UQ80-2;F8VR77;F8W0A3;H0YIN7;F8VZ69	Q9UQ80;Q9UQ80-2;F8VR77	Proliferation-associated protein 2G4	PA2G4	6
NaN	1.2642	NaN				1	3.7	28.068	0	0	0	14002000	5083400	8918700	0	0	0	Q9Y224	Q9Y224	UPF0568 protein C14orf166	C14orf166	1
NaN	NaN	NaN				1	3.6	38.242	0	0	0	0	0	0	0	0	0	Q9Y266	Q9Y266	Nuclear migration protein nudC	NUDC	1
1.3619	NaN	1.1711				1	1.4	129.52	1006900	282300	724610	0	0	0	1991700	837840	1153900	Q9Y2A7-2;Q9Y2A7	Q9Y2A7-2;Q9Y2A7	Nck-associated protein 1	NCKAP1	2
NaN	NaN	0.0012832				1	1.9	69.997	0	0	0	0	0	0	575440000	574740000	695980	Q9Y2W2	Q9Y2W2	WW domain-binding protein 11	WBP11	1
0.9234	1.0421	1.0132				1	3.6	30.446	12061000	5249600	6811100	9605700	3789200	5816500	19887000	8520000	11367000	Q9Y3A2;Q9Y3A2-2	Q9Y3A2;Q9Y3A2-2	Probable U3 small nucleolar RNA-associated protein 11	UTP11L	2
1.1757	NaN	1.2543				2	6.8	20.683	2707500	1064100	1643400	0	0	0	1447400	559720	887670	Q9Y3B7;Q9Y3B7-2	Q9Y3B7;Q9Y3B7-2	39S ribosomal protein L11, mitochondrial	MRPL11	2
NaN	NaN	NaN				1	9.5	15.345	0	0	0	0	0	0	0	0	0	Q9Y3D3	Q9Y3D3	28S ribosomal protein S16, mitochondrial	MRPS16	1
NaN	NaN	1.2812				2	9.6	39.777	0	0	0	0	0	0	1469400	650610	818770	Q9Y3F4-2;Q9Y3F4	Q9Y3F4-2;Q9Y3F4	Serine-threonine kinase receptor-associated protein	STRAP	2
NaN	NaN	NaN				1	3.2	55.21	0	0	0	0	0	0	0	0	0	Q9Y3I0	Q9Y3I0	tRNA-splicing ligase RtcB homolog	C22orf28	1
NaN	NaN	1.133				1	1.9	72.2	0	0	0	0	0	0	2693200	1214000	1479100	Q9Y3Z3;Q9Y3Z3-4;Q9Y3Z3-3	Q9Y3Z3;Q9Y3Z3-4;Q9Y3Z3-3	SAM domain and HD domain-containing protein 1	SAMHD1	3
0.94493	0.90629	0.8262				23	13.3	269.76	215530000	98480000	117050000	262000000	113170000	148820000	356750000	177150000	179600000	Q9Y490	Q9Y490	Talin-1	TLN1	1
0.72292	0.74654	0.71043				2	6.5	43.87	20190000	10212000	9977600	27647000	11995000	15652000	21909000	12667000	9242000	Q9Y570-4;Q9Y570;Q9Y570-2	Q9Y570-4;Q9Y570;Q9Y570-2	Protein phosphatase methylesterase 1	PPME1	3
0.85184	NaN	NaN				2	1.2	100.36	14565000	6774900	7789600	0	0	0	185480	0	185480	Q9Y5G3;Q9Y5G3-2	Q9Y5G3;Q9Y5G3-2	Protocadherin gamma-B1	PCDHGB1	2
NaN	NaN	NaN				1	1.9	101.27	0	0	0	0	0	0	0	0	0	Q9Y5Q9;Q9Y5Q9-2	Q9Y5Q9;Q9Y5Q9-2	General transcription factor 3C polypeptide 3	GTF3C3	2
NaN	1.0825	NaN				1	1.8	91.957	0	0	0	611470	251210	360260	0	0	0	Q9Y5V3-2;Q9Y5V3	Q9Y5V3-2;Q9Y5V3	Melanoma-associated antigen D1	MAGED1	2
0.47652	NaN	NaN				1	1.8	82.17	106780	62368	44416	0	0	0	0	0	0	Q9Y608;Q9Y608-5;Q9Y608-4;Q9Y608-2;Q9Y608-3	Q9Y608;Q9Y608-5;Q9Y608-4;Q9Y608-2;Q9Y608-3	Leucine-rich repeat flightless-interacting protein 2	LRRFIP2	5
NaN	NaN	NaN				1	5.5	28.772	0	0	0	0	0	0	0	0	0	Q9Y696	Q9Y696	Chloride intracellular channel protein 4	CLIC4	1
1.7737	1.8974	1.5952				2	6	49.96	13691000	2412200	11279000	5049100	1305900	3743100	4144800	1376400	2768400	Q9Y6N5;H3BNX3;H3BMS6;H3BNP9	Q9Y6N5;H3BNX3;H3BMS6;H3BNP9	Sulfide:quinone oxidoreductase, mitochondrial	SQRDL	4
0.92824	NaN	NaN				1	1.4	92.651	4155600	2178200	1977400	0	0	0	0	0	0	Q9Y6W3	Q9Y6W3	Calpain-7	CAPN7	1
1.2473	NaN	1.6277		+		1	0.1	1011.1	40874000	20824000	20050000	0	0	0	73217000	37736000	35480000	REV__Q8NF91;REV__A0A0C4DG40;REV__Q8NF91-4;REV__E7ENN3;REV__Q8NF91-2;REV__Q8NF91-8	REV__Q8NF91;REV__A0A0C4DG40;REV__Q8NF91-4;REV__E7ENN3;REV__Q8NF91-2;REV__Q8NF91-8			6
1.014	NaN	NaN		+		1	7.4	12.319	22963000	9189900	13773000	0	0	0	0	0	0	REV__A0A1B0GWD4	REV__A0A1B0GWD4			1
1.1412	1.0534	0.99968		+		1	0.8	145.42	402750	169630	233110	282790	141200	141590	271740	112920	158820	REV__E9PMS6;REV__H0YDG6	REV__E9PMS6;REV__H0YDG6			2
0.64439	0.60028	0.64406		+		1	3.2	40.811	141820000	70691000	71126000	235470000	128300000	107180000	265210000	150570000	114640000	REV__F5H0M1;REV__J3QQZ2	REV__F5H0M1;REV__J3QQZ2			2
0.76211	0.72338	0.69447		+		1	18.3	12.512	38855000	23417000	15438000	13078000	6591100	6486500	47270000	30683000	16588000	REV__H0YD35	REV__H0YD35			1
0.66716	0.70105	0.81565	+	+		1	2	81.731	13166000	7143900	6022300	14581000	7255600	7325500	20587000	12272000	8315800	REV__X6R8W7;REV__P47736-4;REV__J3KPC5;REV__P47736-3;REV__P47736-2;REV__P47736	REV__X6R8W7;REV__P47736-4;REV__J3KPC5;REV__P47736-3;REV__P47736-2;REV__P47736			6
0.81799	0.66215	0.87765		+		1	1.9	47.551	62998000	31408000	31590000	39186000	20196000	18990000	92501000	46545000	45956000	REV__O15394-2	REV__O15394-2			1
1.0292	1.0152	1.0246	+	+		1	0.3	367.76	115570000	46315000	69255000	202230000	76130000	126100000	112110000	49801000	62305000	REV__P49454	REV__P49454			1
1.0581	0.91926	0.51201		+		1	0.8	143.23	4734600	1981100	2753500	11648000	5091200	6556500	7641100	3616700	4024400	REV__Q6ZT07	REV__Q6ZT07			1
NaN	0.95934	1.0556		+		1	4.5	26.758	0	0	0	242650000	96057000	146590000	306250000	140660000	165600000	REV__Q92466-5	REV__Q92466-5			1
0.81574	0.7918	0.89355		+		1	1	87.81	8748100	4260000	4488100	13371000	6308200	7062500	15910000	7957900	7952100	REV__Q96CN9	REV__Q96CN9			1
